# Supplementary material for: 2,3-Dihydroquinazolin-4(1H)-ones and quinazolin-4(3H)-ones as broad-spectrum cytotoxic agents and their impact on tubulin polymerisation
Source: Royal Society of Chemistry journal article supplement (doi:10.1039/d3md00600j), 2024-01-01

## **2,3-Dihydroquinazolin-4(1*H*)-ones and Quinazolin-4(3*H*)-ones as Broad-Spectrum Cytotoxic Agents and Impact on Tubulin Polymerisation**

Nicholas S. O'Brien, <sup>[a]</sup> Jayne Gilbert, <sup>[b]</sup> Adam McCluskey <sup>[a]\*</sup> and Jennette A. Sakoff <sup>[b]\*</sup>

<sup>[a]</sup> Chemistry, School of Environmental & Life Sciences, The University of Newcastle, University Drive, Callaghan, NSW 2308, Australia. Phone: +61(0)249216486; Fax: +61(0)249215472; E-mail: [Adam.McCluskey@newcastle.edu.au](mailto:Adam.McCluskey@newcastle.edu.au)

<sup>[b]</sup> Experimental Therapeutics Group, Department of Medical Oncology, Calvary Mater Newcastle Hospital, Edith Street, Waratah, 2298, NSW, Australia.

### **Supplementary Data**

#### **Contents**

Initial toxicity screening data at 25µM compound concentration

Table S1 – Library 1, compounds **10-46**

Table S2 – Library 2, compounds **47-57** and **60-66**

NMR and compound analysis data

**Table S1.** Growth inhibition of a panel of cancer cell lines (glioblastoma (U87 and SJ-G2), ovarian (A2780), lung (H460), skin (A431), prostate (Du145), neuroblastoma (BE2-C), pancreas (MIA) and normal breast (MCF10A)) by *Library 1* quinazolin-4(1*H*)-ones (**10-17**). Data is presented as percentage growth inhibition relative to untreated control at 25  $\mu$ M compound concentration (MTT assay, 72 h), higher number indicate higher potency.

|                                                                                                 | HT29 <sup>a</sup> | U87 <sup>b</sup> | MC-7 <sup>c</sup> | A2780 <sup>d</sup> | H460 <sup>e</sup> | A431 <sup>f</sup> | Du145 <sup>g</sup> | BE2-C <sup>h</sup> | SJ-G2 <sup>b</sup> | MIA <sup>i</sup> | MCF10A <sup>i</sup> |
|-------------------------------------------------------------------------------------------------|-------------------|------------------|-------------------|--------------------|-------------------|-------------------|--------------------|--------------------|--------------------|------------------|---------------------|
| 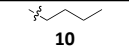<br><b>10</b>   | 32±3              | 9±4              | 25±6              | 59±4               | <10               | 30± 14            | 25±4               | 38±29              | <10                | 16±10            | 13±6                |
| <br><b>11</b>   | 93±3              | 39±3             | >100              | 96±2               | 61±6              | 91± 5             | 53±5               | 85±4               | 77±3               | 75±4             | 80±3                |
| <br><b>12</b>   | 22±5              | 11±6             | 35±3              | 39±6               | <10               | 15±15             | 22±2               | 20±18              | <10                | 19±10            | 12±7                |
| <br><b>13</b>   | 23±3              | 10±5             | 18±6              | 41±3               | <10               | 22±11             | 18±2               | 32 ± 26            | <10                | 12±11            | 8±7                 |
| <br><b>14</b>   | >100              | 67±5             | 72±8              | 99±1               | 91±3              | >100              | 67±5               | 97±3               | 87±11              | 82±3             | 89±2                |
| <br><b>15</b>   | >100              | 91±4             | 94±3              | 97±1               | 95±2              | >100              | >100               | 94±6               | >100               | 87±2             | 97±0                |
| <br><b>16</b>   | >100              | >100             | 90±7              | >100               | >100              | >100              | >100               | 87±13              | >100               | 95±3             | 100±1               |
| <br><b>17</b>   | 79 ± 6            | 40±6             | >100              | 63±3               | 44±5              | 32±9              | 47±5               | 47±10              | 46± 10             | 60±4             | 53±5                |
| <br><b>18</b>   | >100              | 80±3             | 82±4              | 96±1               | 95±1              | >100              | 100±3              | >100               | >100               | 89±2             | 94±1                |
| <br><b>19</b>  | >100              | 98±3             | 104 ± 4           | 99±1               | 101±1             | >100              | >100               | >100               | >100               | 90 ± 2           | 99±1                |
| <br><b>20</b> | >100              | 88±5             | 89 ± 7            | 99±1               | 97±2              | >100              | >100               | >100               | >100               | 90 ± 3           | 95±2                |
| <br><b>21</b> | >100              | 65±1             | 66±8              | 95±1               | 94±1              | >100              | 72±3               | 97±3               | >100               | 86±2             | 92±1                |
| <br><b>22</b> | >100              | 72±3             | 55±6              | 95±1               | 88±3              | 108 ± 1           | 90±5               | 100±3              | >100               | 84±3             | 91±1                |
| <br><b>23</b> | 37 ± 2            | <10              | 49±11             | 48±1               | 43±8              | 22 ± 2            | 20±5               | 19±15              | 49±8               | 20±10            | 20±8                |
| <br><b>24</b> | 24 ± 14           | 10±1             | 43±5              | 10±8               | 12±0              | <10               | 31±3               | 12                 | 12±4               | 13±5             | 22±6                |
| <br><b>25</b> | 18 ± 0            | 13±7             | 41±8              | <10                | <10               | <10               | 36±2               | 12                 | 10±5               | 14±3             | 8±6                 |
| <br><b>26</b> | 28 ± 12           | 16±1             | 16±7              | 33±8               | 35±6              | 36 ± 2            | 27±2               | <10                | 33±22              | 21±10            | 16±8                |
| <br><b>27</b> | 78 ± 4            | 20±5             | >100              | 69±3               | 59±3              | 67 ± 5            | 33±4               | 58±10              | 61±3               | 56±3             | 54±6                |

|                                                                                                 |         |       |       |       |       |        |       |           |       |      |       |
|-------------------------------------------------------------------------------------------------|---------|-------|-------|-------|-------|--------|-------|-----------|-------|------|-------|
| <br><b>28</b>   | 70 ± 4  | 22±4  | >100  | 65±3  | 61±3  | 57 ± 3 | 50±2  | 53±5      | 56±6  | 52±4 | 58±7  |
| <br><b>29</b>   | >100    | 99±3  | 85±8  | 100±1 | 100±1 | >100   | >100  | >100      | >100  | 94±4 | >100  |
| <br><b>30</b>   | >100z   | >100  | 83±7  | 100±0 | 100±2 | >100   | >100  | >100      | >100  | 95±4 | >100  |
| <br><b>31</b>   | 31 ± 10 | 19±2  | 60±27 | 54±4  | 17±10 | 34±3   | 26±8  | 20±5      | 18±12 | 14±4 | 12±4  |
| <br><b>32</b>   | 16 ± 5  | <10   | 40±19 | 18±0  | 11±8  | <10    | 10±1  | <10       | 14±4  | 11±8 | 10±3  |
| <br><b>33</b>   | 49±3    | 29±3  | 56±7  | 36±23 | 19±11 | 21±12  | 40±4  | <b>27</b> | 10±6  | 34±7 | 51±3  |
| <br><b>34</b>   | <10     | <10   | 21±8  | <10   | <10   | <10    | <10   | <10       | <10   | 11±4 | <10   |
| <br><b>35</b>   | 90±10   | 56±5  | 91±16 | 98±1  | 88±2  | >100   | 57±5  | 91±4      | 60±10 | 74±4 | 84±4  |
| <br><b>36</b>   | <10     | <10   | 13±3  | 37±4  | <10   | <10    | <10   | 20±22     | 12±14 | <10  | <10   |
| <br><b>37</b>   | >100    | >100  | >100  | >100  | >100  | >100   | >100  | 92±12     | >100  | >100 | 98±1  |
| <br><b>38</b>  | >100    | 94±5  | 135±9 | >100  | 100±1 | >100   | >100  | 98±5      | >100  | >100 | 99±2  |
| <br><b>39</b> | >100    | 93±3  | >100  | >100  | >100  | >100   | >100  | >100      | >100  | 94±3 | >100  |
| <br><b>40</b> | >100    | 95±5  | 74±3  | >100  | 91±2  | >100   | >100  | 95±2      | >100  | 80±3 | 97±2  |
| <br><b>41</b> | >100    | 70±3  | 78±6  | 99±1  | 96±2  | >100   | 77±5  | 97±2      | >100  | 79±5 | 90±1  |
| <br><b>42</b> | 35±18   | <10   | 49±11 | 60±1  | 21±4  | 25±8   | 22±12 | 64±0      | 29±46 | 22±8 | 41±12 |
| <br><b>43</b> | 29±4    | <10   | 38±2  | 29±10 | <10   | 14±4   | 27±1  | <b>19</b> | 16±1  | 27±1 | 23±2  |
| <br><b>44</b> | >100    | 95±11 | >100  | 94±4  | 97±7  | >100   | >100  | 87±11     | >100  | 81±9 | 99±4  |
| <br><b>45</b> | 37±12   | 24±18 | 55±7  | 69±32 | 35±6  | 40±31  | 66±15 | 53±6      | 81±40 | 32±7 | 13±9  |
| <br><b>46</b> | 90±13   | 99±4  | 83±18 | >100  | 93±2  | >100   | 100±3 | 100±2     | 100±5 | 93±2 | 100±1 |

<sup>a</sup> Colon, <sup>b</sup> Glioblastoma, <sup>c</sup> Breast, <sup>d</sup> Ovarian, <sup>e</sup> Lung, <sup>f</sup> Skin, <sup>g</sup> Prostate, <sup>h</sup> Neuroblastoma, <sup>i</sup> Pancreas, <sup>j</sup> Breast (normal)

**Table S2.** Growth inhibition of a panel of cancer cell lines (glioblastoma (U87 and SJ-G2), ovarian (A2780), lung (H460), skin (A431), prostate (Du145), neuroblastoma (BE2-C), pancreas (MIA) and normal breast (MCF10A)) by *Library 4* 2,3-dihydroquinazolin-4(1*H*)-ones (**47-52**). Data is presented as percentage growth inhibition relative to untreated control at 25  $\mu$ M compound concentration (MTT assay, 72 h), higher number indicate higher potency.

|                                                                                                  | 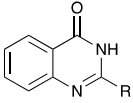 |                  |                   |                    |                   |                   |                    |                    |                    |                  |                     |
|--------------------------------------------------------------------------------------------------|-----------------------------------------------------------------------------------|------------------|-------------------|--------------------|-------------------|-------------------|--------------------|--------------------|--------------------|------------------|---------------------|
|                                                                                                  | HT29 <sup>a</sup>                                                                 | U87 <sup>b</sup> | MC-7 <sup>c</sup> | A2780 <sup>d</sup> | H460 <sup>e</sup> | A431 <sup>f</sup> | Du145 <sup>g</sup> | BE2-C <sup>h</sup> | SJ-G2 <sup>b</sup> | MIA <sup>i</sup> | MCF10A <sup>j</sup> |
| <br><b>40</b>   | 92±2                                                                              | 47±2             | 63±6              | 57±6               | 77±2              | 75±1              | 28±7               | 66±6               | 71±19              | 76±3             | 76±2                |
| <br><b>41</b>   | 84±2                                                                              | 91±3             | 116±7             | 94±2               | 87±3              | 79±5              | >100               | 89±2               | >100               | 90±2             | 95±1                |
| <br><b>49</b>   | 11±2                                                                              | <10              | <10               | <10                | 15±3              | <10               | <10                | <10                | <10                | 10±4             | <10                 |
| <br><b>50</b>   | 78±2                                                                              | 24±9             | >100              | 66±4               | 60±4              | 45±4              | 41±7               | 66±3               | 89±10              | 67±4             | 60±5                |
| <br><b>51</b>   | >100                                                                              | >100             | >100              | >100               | >100              | >100              | >100               | >100               | >100               | 96±3             | >100                |
| <br><b>52</b>  | 94±2                                                                              | 83±4             | >100              | 93±1               | 70±5              | 78±5              | 77±3               | 78±1               | 76±13              | 68±5             | 86±6                |
| <br><b>53</b> | <10                                                                               | 25±2             | 16±11             | 43±6               | 33±5              | 22±7              | 26±9               | <10                | 16±28              | 18±3             | 11±7                |
| <br><b>54</b> | 28±2                                                                              | 12±2             | 21±4              | 15±10              | 12±6              | <10               | 23±8               | <10                | <10                | 23±5             | 15±2                |
| <br><b>55</b> | 15±11                                                                             | 14±0             | 10±1              | 13±10              | 20±1              | 12±6              | 25±2               | <b>23</b>          | 11±3               | 24±3             | 17±3                |
| <br><b>56</b> | 91±3                                                                              | 91±6             | 99±4              | 83±5               | 68±5              | 88±3              | 98±5               | 77±2               | 66±7               | 71±2             | 91±3                |
| <br><b>57</b> | -                                                                                 | -                | -                 | -                  | -                 | -                 | -                  | -                  | -                  | -                | -                   |
| <br><b>60</b> | 40±4                                                                              | 11±3             | 77±2              | 16±1               | 34±2              | 8±2               | 32±4               | 47±1               | 43±1               | 39±2             | 48±7                |
| <br><b>61</b> | >100                                                                              | 51±1<br>2        | >100              | 97±2               | 69±5              | 93±3              | 61±4               | 82±4               | 57±7               | 85 ±<br>4        | 86±5                |
| <br><b>62</b> | >100                                                                              | 73±6             | >100              | >100               | >100              | >100              | >100               | >100               | >100               | >100             | 97±1                |
| <br><b>63</b> | >100                                                                              | >100             | >100              | >100               | >100              | >100              | >100               | >100               | >100               | >100             | >100                |
| <br><b>64</b> | >100                                                                              | >100             | >100              | >100               | >100              | >100              | >100               | >100               | >100               | >100             | >100                |
| <br><b>65</b> | >100                                                                              | 75±11            | >100              | >100               | >100              | >100              | 78±2               | 99±1               | 100±3              | 93±2             | 95±2                |
| <br><b>66</b> | 50±2                                                                              | 21±4             | 85±4              | 62±4               | 35±3              | 11±2              | 34±4               | 61±2               | 47±5               | 89±2             | 57±5                |

<sup>a</sup> Colon, <sup>b</sup> Glioblastoma, <sup>c</sup> Breast, <sup>d</sup> Ovarian, <sup>e</sup> Lung, <sup>f</sup> Skin, <sup>g</sup> Prostate, <sup>h</sup> Neuroblastoma, <sup>i</sup> Pancreas, <sup>j</sup> Breast (normal); ‘-’  
Not Tested: Compound INSOLUBLE at 2.5 mM.

## Spectra and Characterisation

### 2-Butyl-2,3-dihydroquinazolin-4(1H)-one (**10**)

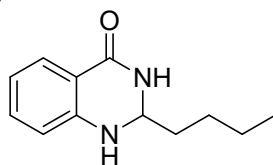

Chemical Formula: C<sub>12</sub>H<sub>16</sub>N<sub>2</sub>O

Exact Mass: 204.13

Molecular Weight: 204.27

**IR** (neat):  $\nu_{\max}$  = 3340 (NH), 3178 (NH), 2926 (CH<sub>2</sub>), 1643 (C=O) cm<sup>-1</sup>

**<sup>1</sup>H NMR** (400 MHz, DMSO-d<sub>6</sub>)  $\delta$  7.87 (s, 1H), 7.58 (dd,  $J$  = 7.7, 1.2 Hz, 1H), 7.24 – 7.20 (m, 1H), 6.73 (d,  $J$  = 8.0 Hz, 1H), 6.65 (dd,  $J$  = 11.0, 3.9 Hz, 1H), 6.55 (s, 1H), 4.68 (t,  $J$  = 5.3 Hz, 1H), 1.64 – 1.61 (m, 2H), 1.40 – 1.28 (m, 4H), 0.88 (t,  $J$  = 7.2 Hz, 3H).

**<sup>13</sup>C NMR** (100 MHz, DMSO-d<sub>6</sub>)  $\delta$  163.9, 148.5, 133.0, 127.3, 116.9, 115.0, 114.4, 64.4, 34.7, 25.4, 22.1, 13.9.

**LRMS** (ESI+): 205.2 (M+H, C<sub>12</sub>H<sub>17</sub>N<sub>2</sub>O, 100%).

Mass 136 mg

m.p. 137 – 143 °C

yield: 34 %

white solid

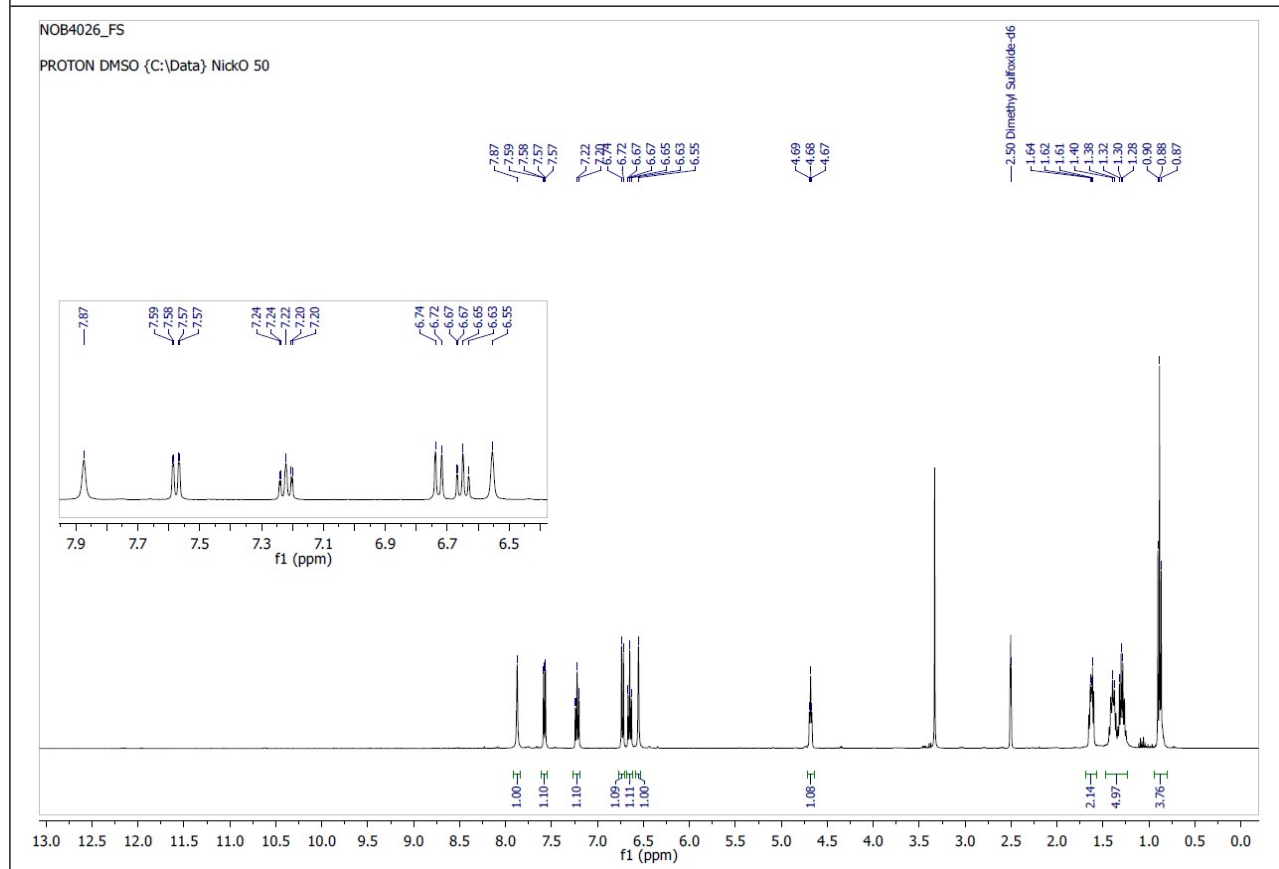

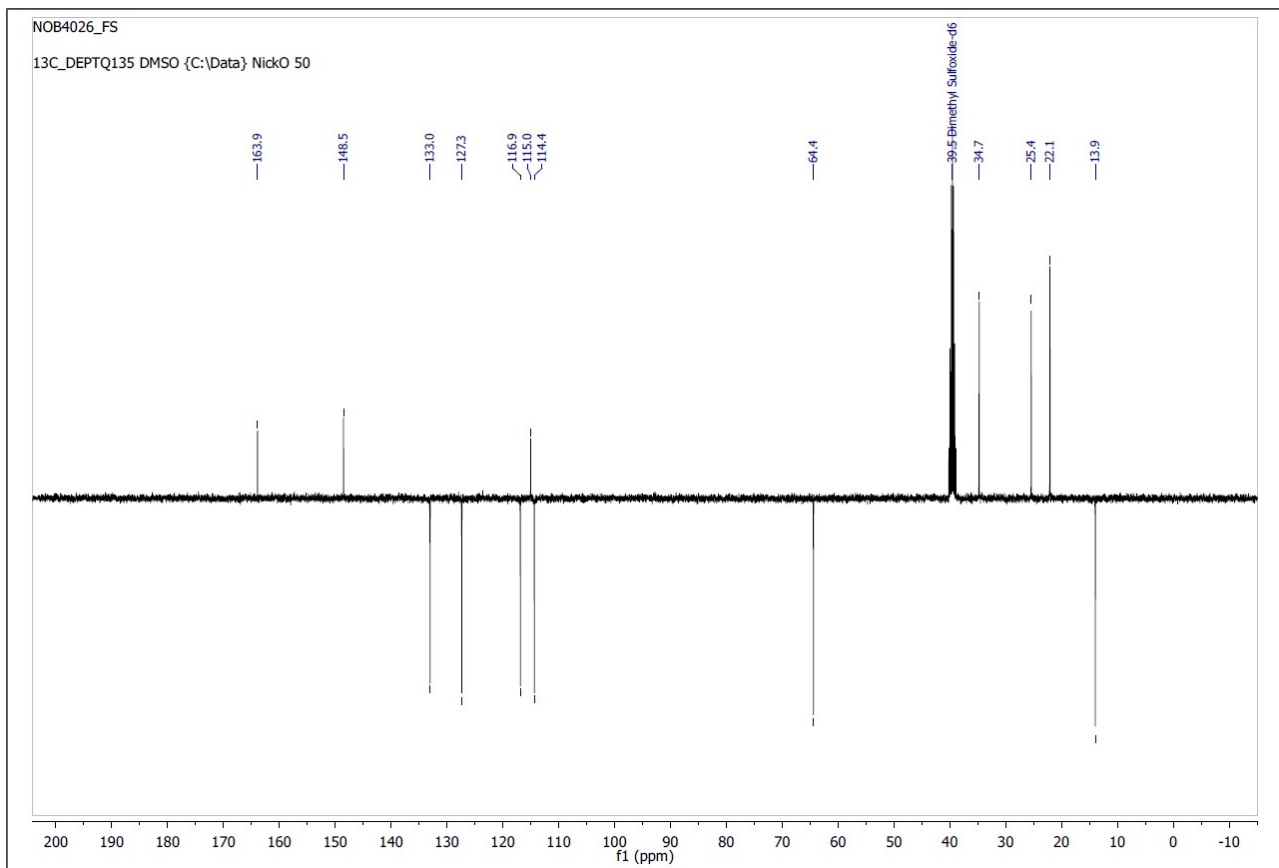

2-Heptyl-2,3-dihydroquinazolin-4(1H)-one (**11**)

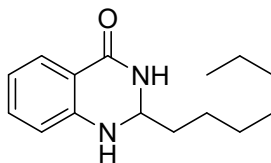

Chemical Formula: C<sub>15</sub>H<sub>22</sub>N<sub>2</sub>O

Exact Mass: 246.17

Molecular Weight: 246.35

**IR** (neat):  $\nu_{\max}$  = 3333 (NH), 3185 (NH), 22925 (CH<sub>2</sub>), 1641 (C=O) cm<sup>-1</sup>

**<sup>1</sup>H NMR** (400 MHz, DMSO-d<sub>6</sub>)  $\delta$  7.87 (s, 1H), 7.58 (dd,  $J$  = 7.7, 1.5 Hz, 1H), 7.22 (ddd,  $J$  = 8.3, 7.2, 1.6 Hz, 1H), 6.73 (d, 1H), 6.65 (d, 1H), 6.55 (s, 1H), 4.68 (t,  $J$  = 5.2 Hz, 1H), 1.68 – 1.55 (m, 2H), 1.44 - 1.39 (m, 2H), 1.31-1.25 (m, 8H), 0.87 (t,  $J$  = 6.8 Hz, 3H).

**<sup>13</sup>C NMR** (100 MHz, DMSO-d<sub>6</sub>)  $\delta$  163.91, 148.50, 133.00, 127.33, 116.84, 115.01, 114.34, 64.42, 35.02, 31.18, 28.90, 28.65, 23.22, 22.08, 13.95.

**LRMS** (ESI<sup>+</sup>): 247.2 (M+H, C<sub>15</sub>H<sub>23</sub>N<sub>2</sub>O, 100%); LRMS (ESI<sup>-</sup>): 291.2 (M+FA-H, C<sub>16</sub>H<sub>25</sub>N<sub>2</sub>O<sub>3</sub>, 100%).

Mass 113.3 mg

m.p. 160 – 163 °C

yield 35 %

colour white solid

NOB4027\_FS

PROTON DMSO (C:\Data) NickO 51

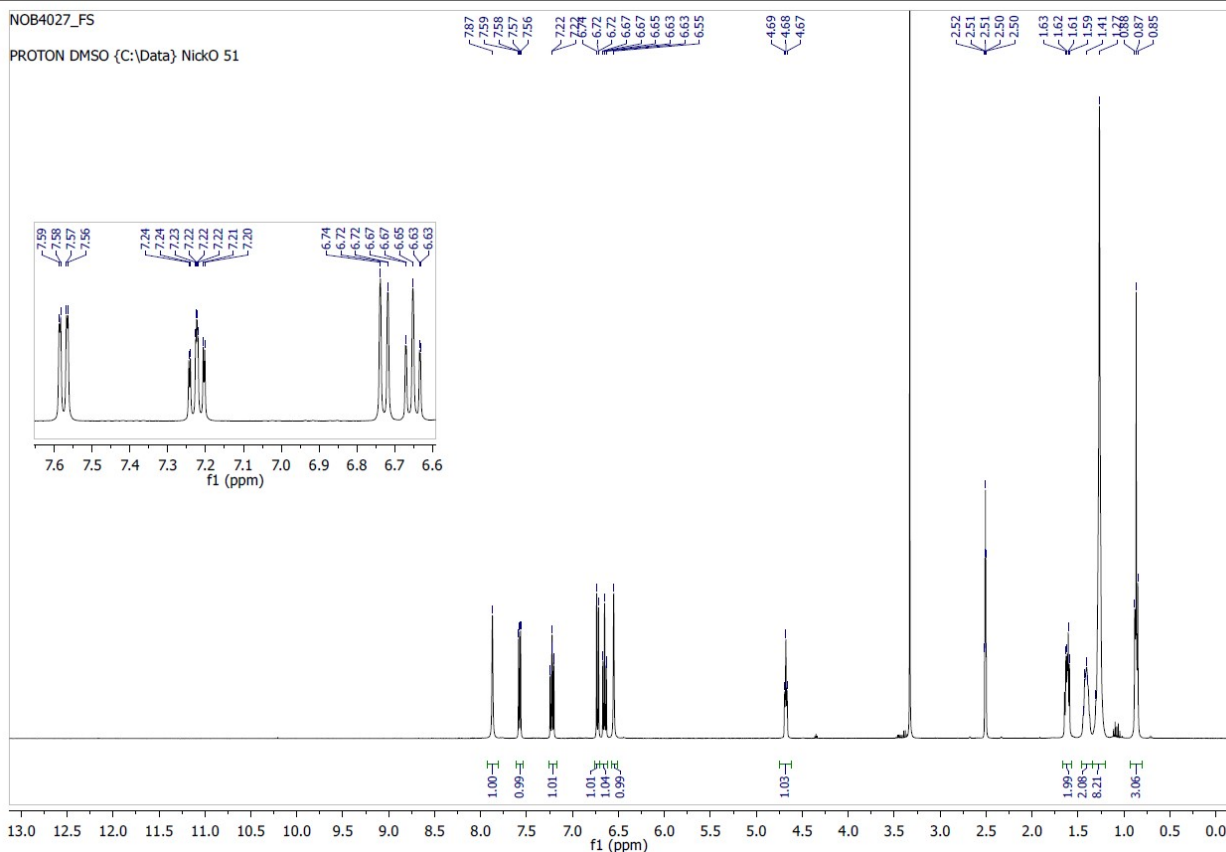

NOB4027\_FS

13C DEPTQ135 DMSO (C:\Data) NickO 51

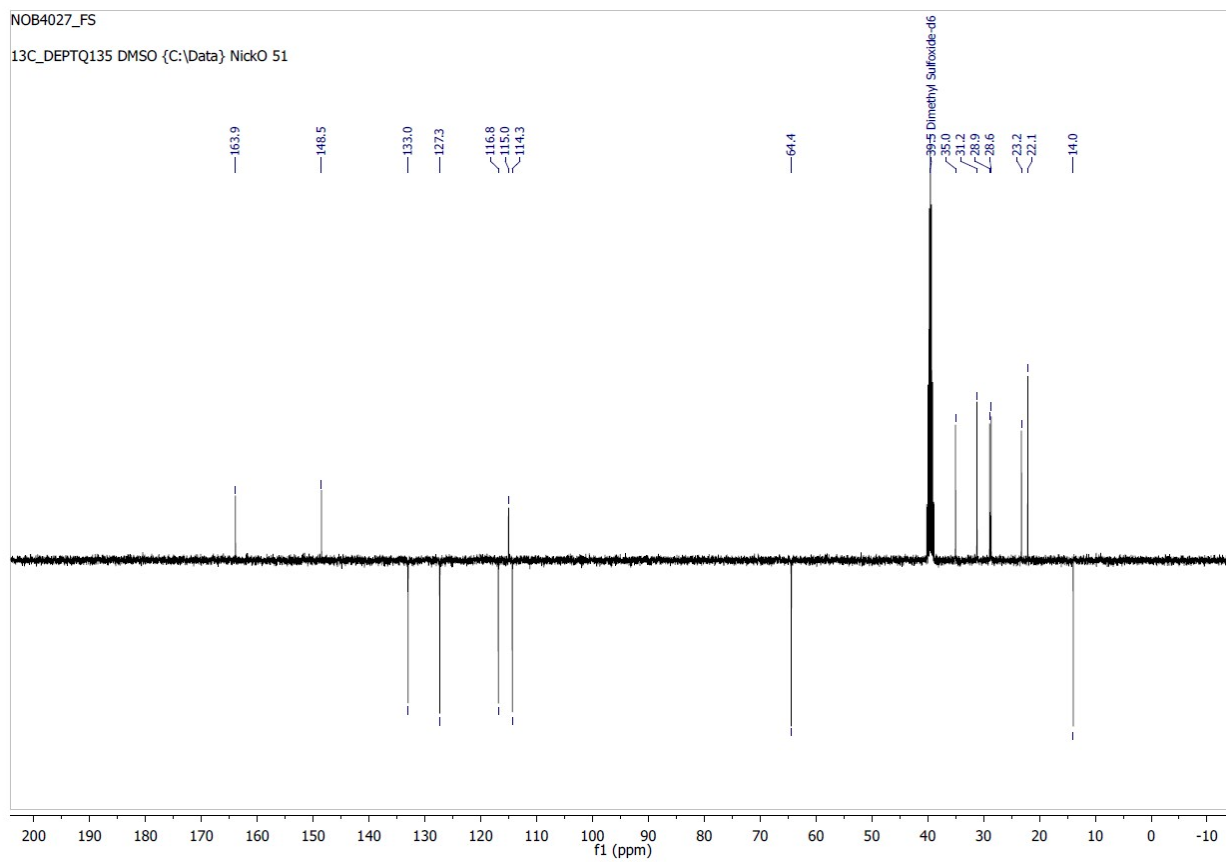



2-cyclopentyl-2,3-dihydroquinazolin-4(1H)-one (**12**)

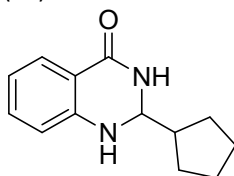

Chemical Formula: C<sub>13</sub>H<sub>16</sub>N<sub>2</sub>O

Exact Mass: 216.13

Molecular Weight: 216.28

IR (neat):  $\nu_{\max}$  = 3329 (NH), 3185 (NH), 2964 (CH<sub>2</sub>), 1635 (C=O) cm<sup>-1</sup>

<sup>1</sup>H NMR (400 MHz, DMSO-d<sub>6</sub>)  $\delta$  7.91 (s, 1H), 7.56 (dd, *J* = 7.7, 1.3 Hz, 1H), 7.23 – 7.19 (m, 1H), 6.76 (d, *J* = 7.9 Hz, 1H), 6.64 – 6.60 (m, 1H), 6.53 (s, 1H), 4.48 (d, *J* = 6.6 Hz, 1H), 2.25 – 2.10 (m, 1H), 1.65 – 1.43 (m, 8H).

<sup>13</sup>C NMR (100 MHz, DMSO-d<sub>6</sub>)  $\delta$  163.6, 148.2, 133.0, 127.2, 116.6, 115.1, 114.3, 67.7, 44.9, 27.3, 27.2, 25.1, 25.0.

LRMS (ESI+): 217.1 (M+H, C<sub>13</sub>H<sub>17</sub>N<sub>2</sub>O, 100%)

Mass 303.8

m.p. 166 – 167°C

yield: 87 %

colour white solid

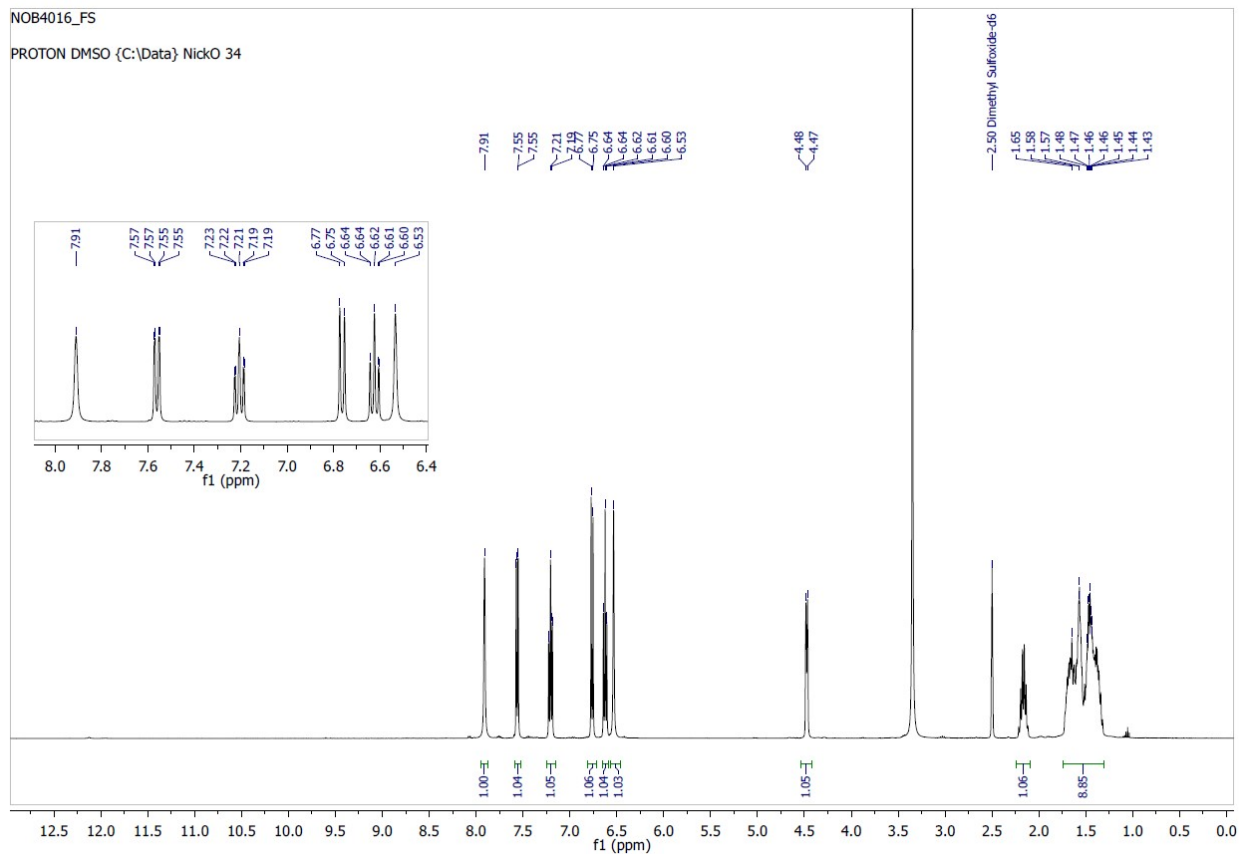

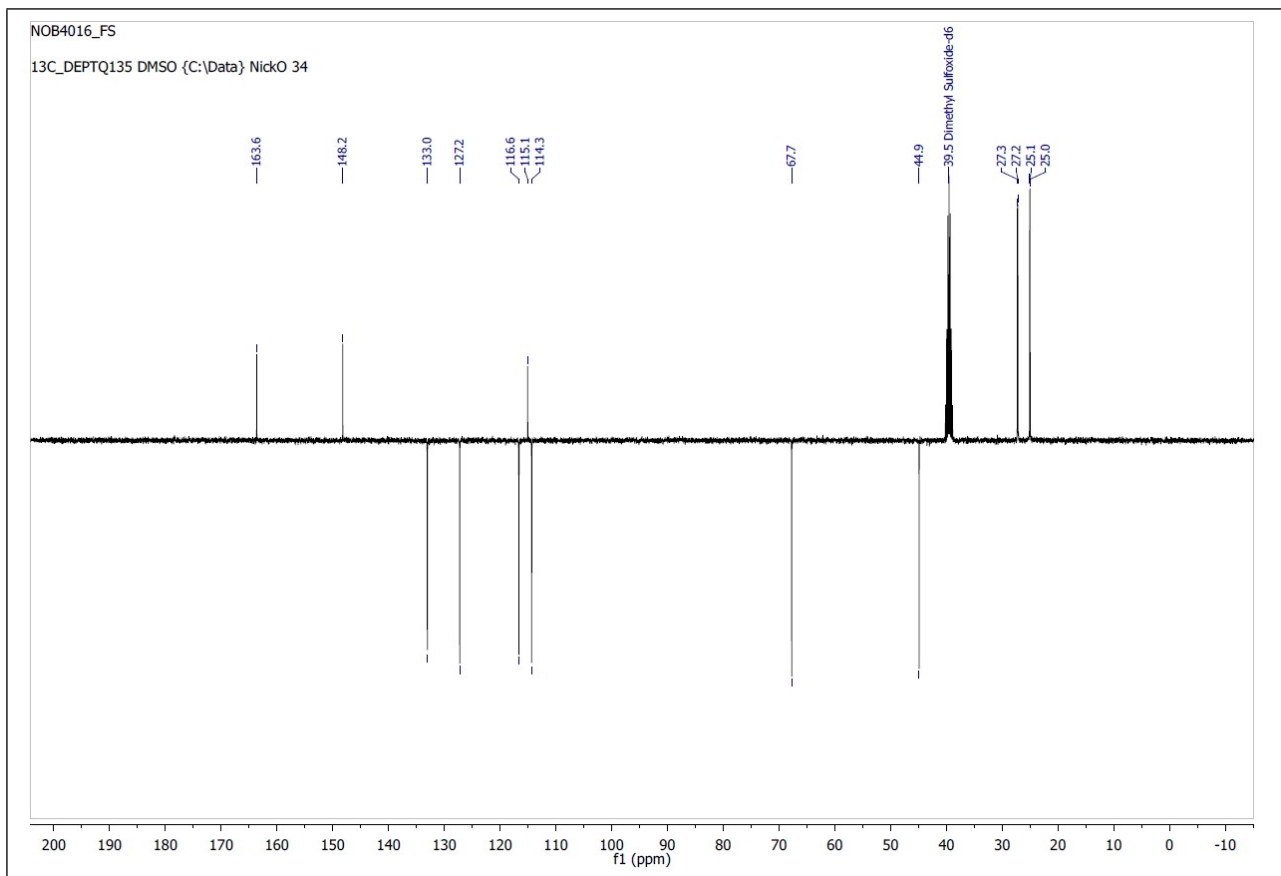

2-cyclohexyl-2,3-dihydroquinazolin-4(1H)-one (**13**)

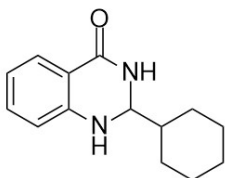

2-cyclohexyl-2,3-dihydroquinazolin-4(1H)-one

Chemical Formula:  $C_{14}H_{18}N_2O$

Exact Mass: 230.14

Molecular Weight: 230.31

**IR** (neat):  $\nu_{\max}$  = 3336 (NH), 3172 (NH), 2921 (CH<sub>2</sub>), 1642 (C=O)  $cm^{-1}$

**<sup>1</sup>H NMR** (400 MHz, DMSO-*d*<sub>6</sub>)  $\delta$  7.86 (s, 1H), 7.55 (dd,  $J$  = 7.7, 1.5 Hz, 1H), 7.19 (ddd,  $J$  = 8.7, 7.2, 1.6 Hz, 1H), 6.74 (d,  $J$  = 7.7 Hz, 1H), 6.62 – 6.58 (m, 1H), 6.54 (s, 1H), 4.45 – 4.43 (m, 1H), 1.71 – 1.55 (m, 6H), 1.16 – 1.07 (m, 4H).

**<sup>13</sup>C NMR** (100 MHz, DMSO-*d*<sub>6</sub>)  $\delta$  163.7, 148.3, 133.0, 127.2, 116.4, 114.8, 114.1, 68.6, 42.8, 27.0, 26.7, 25.9, 25.6, 25.5.

**LRMS** (ESI+) 231.2 (M+H,  $C_{15}H_{19}N_2O$ , 100%).

Mass: 223.4 mg

m.p. 176 – 184°C

yield: 89 %

white solid

NOB4015\_FS  
PROTON DMSO {C:\Data} NickO 4

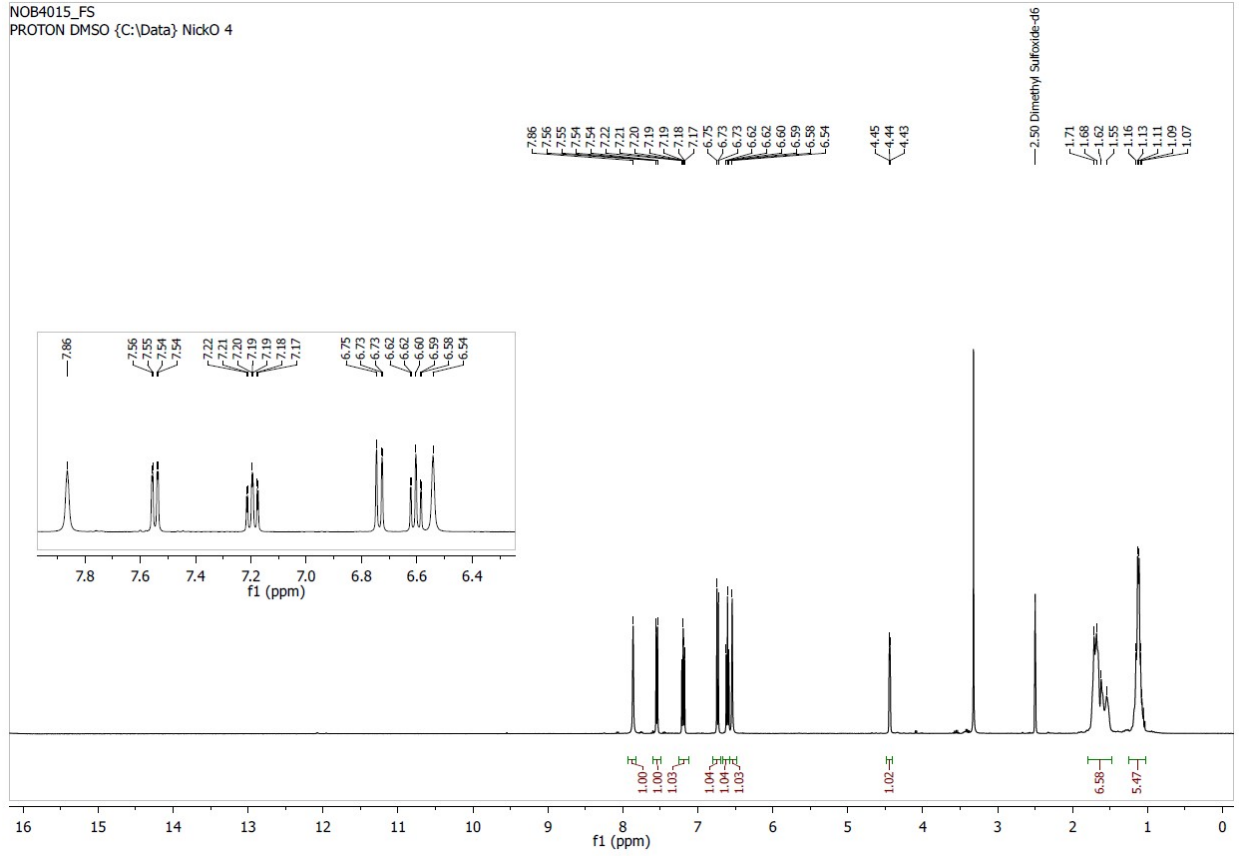

NOB4015\_FS  
13C\_DEPTQ135 DMSO {C:\Data} NickO 4

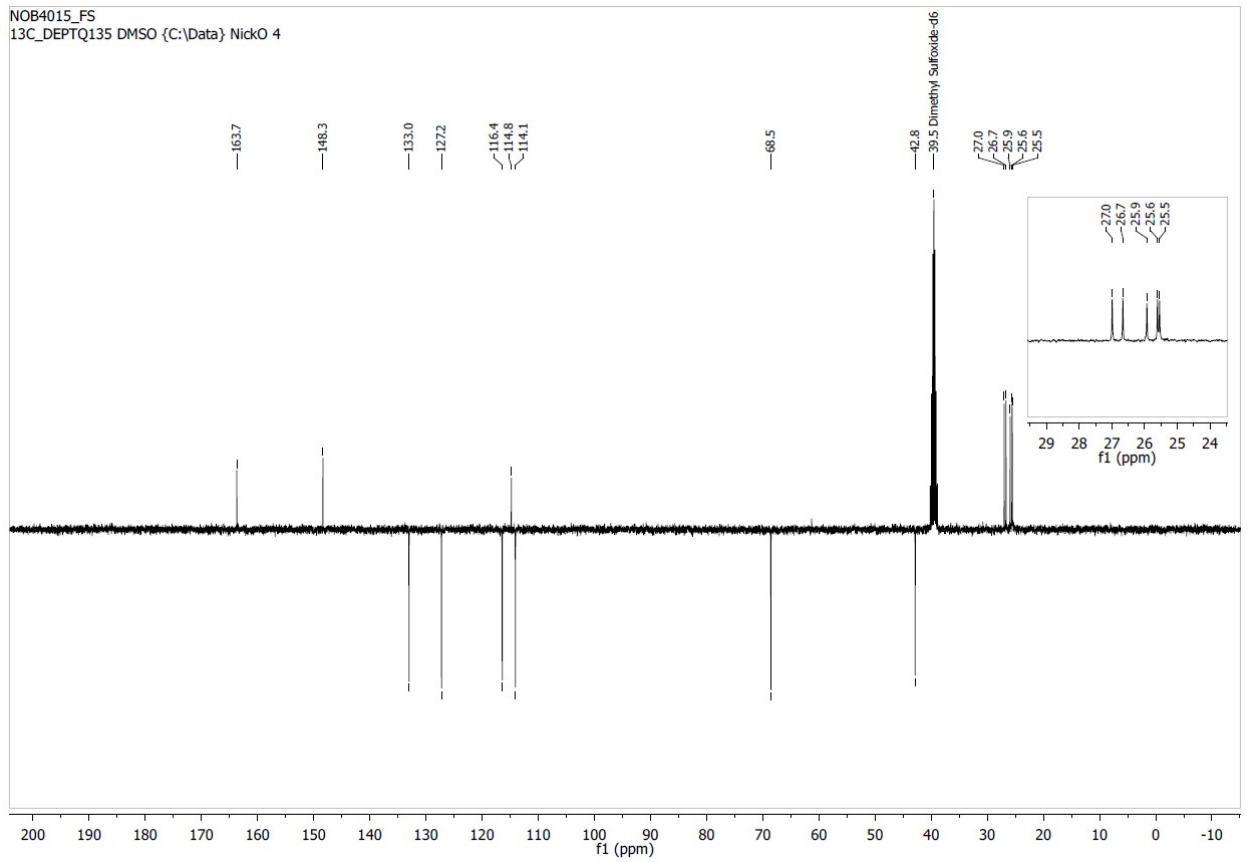



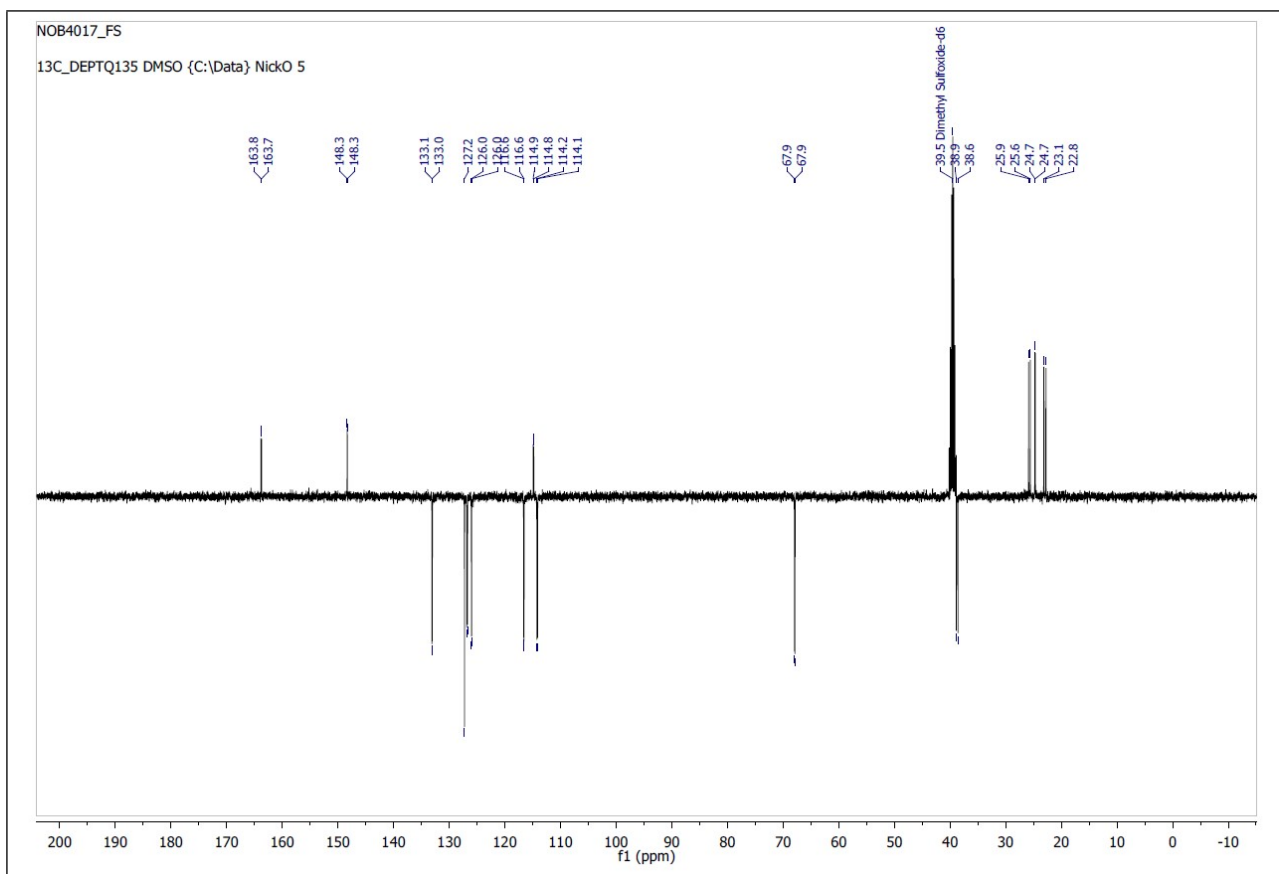

2-phenyl-2,3-dihydroquinazolin-4(1H)-one (**15**)

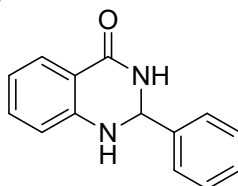

Chemical Formula: C<sub>14</sub>H<sub>12</sub>N<sub>2</sub>O

Exact Mass: 224.09

Molecular Weight: 224.26

**IR** (neat):  $\nu_{\max}$  = 3308 (NH), 3169 (NH), 3061 (CH), 1649 (C=O) cm<sup>-1</sup>

**<sup>1</sup>H NMR** (400 MHz, DMSO-d<sub>6</sub>)  $\delta$  8.27 (s, 1H), 7.61 (dd, *J* = 7.7, 1.6 Hz, 1H), 7.49 (dd, *J* = 8.2, 1.3 Hz, 2H), 7.43 – 7.31 (m, 3H), 7.24 (ddd, *J* = 8.2, 7.2, 1.6 Hz, 1H), 7.10 (s, 1H), 6.75 – 6.73 (m, 1H), 6.69 – 6.65 (m, 1H), 5.75 (s, 1H).

**<sup>13</sup>C NMR** (100 MHz, DMSO-d<sub>6</sub>)  $\delta$  163.6, 147.9, 141.6, 133.3, 128.4, 128.3 (2C), 127.3, 126.8 (2C), 117.1, 114.9, 114.4, 66.5.

**LRMS** (ESI+): 225 (M+H, C<sub>14</sub>H<sub>13</sub>N<sub>2</sub>O, 100%); (ESI-): 223 (M-H C<sub>14</sub>H<sub>11</sub>N<sub>2</sub>O, 100%).

m.p. : >225.6°C (decomp.)

Yield 80%

White crystalline solid

NOB2145\_FSR

1H DMSO {C:\Data} NickO 43

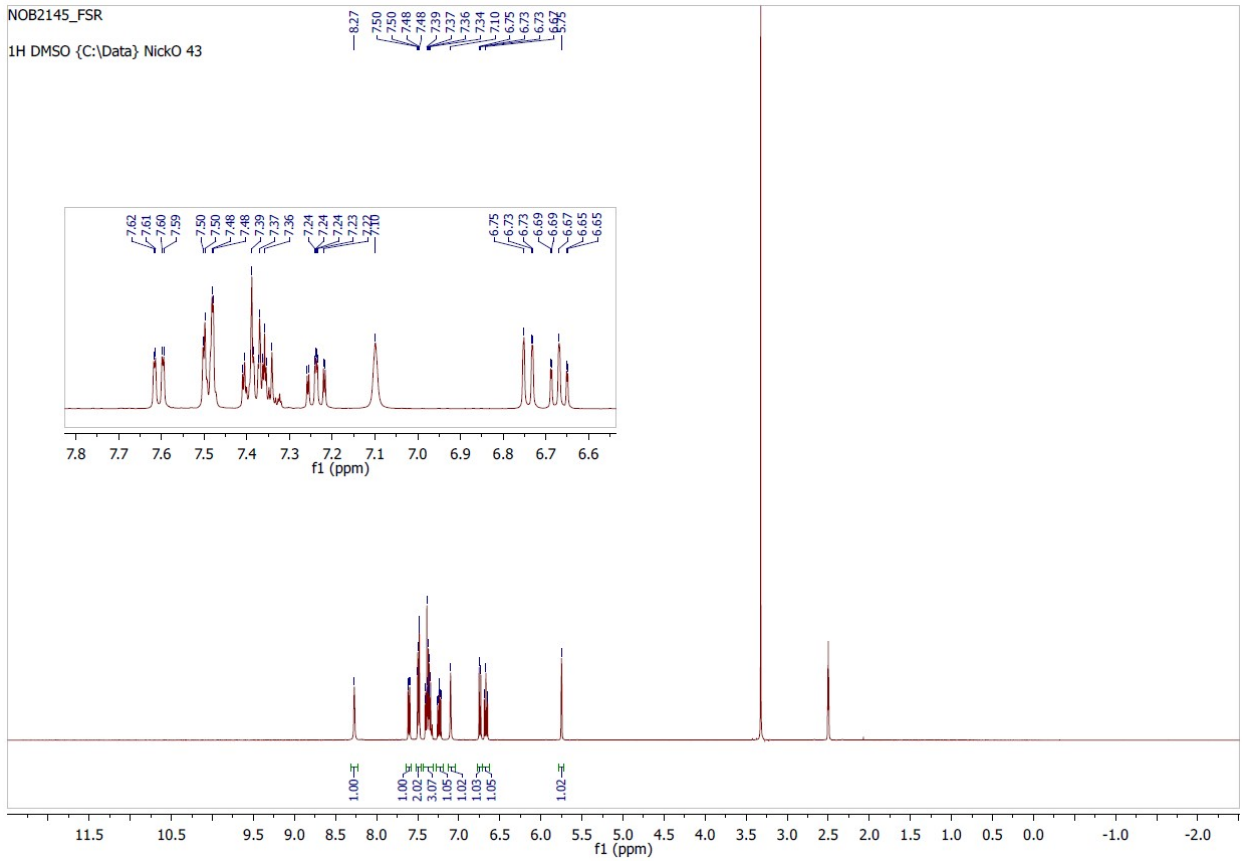

NOB2145\_FSR

13C\_3hours DMSO {C:\Data} NickO 43

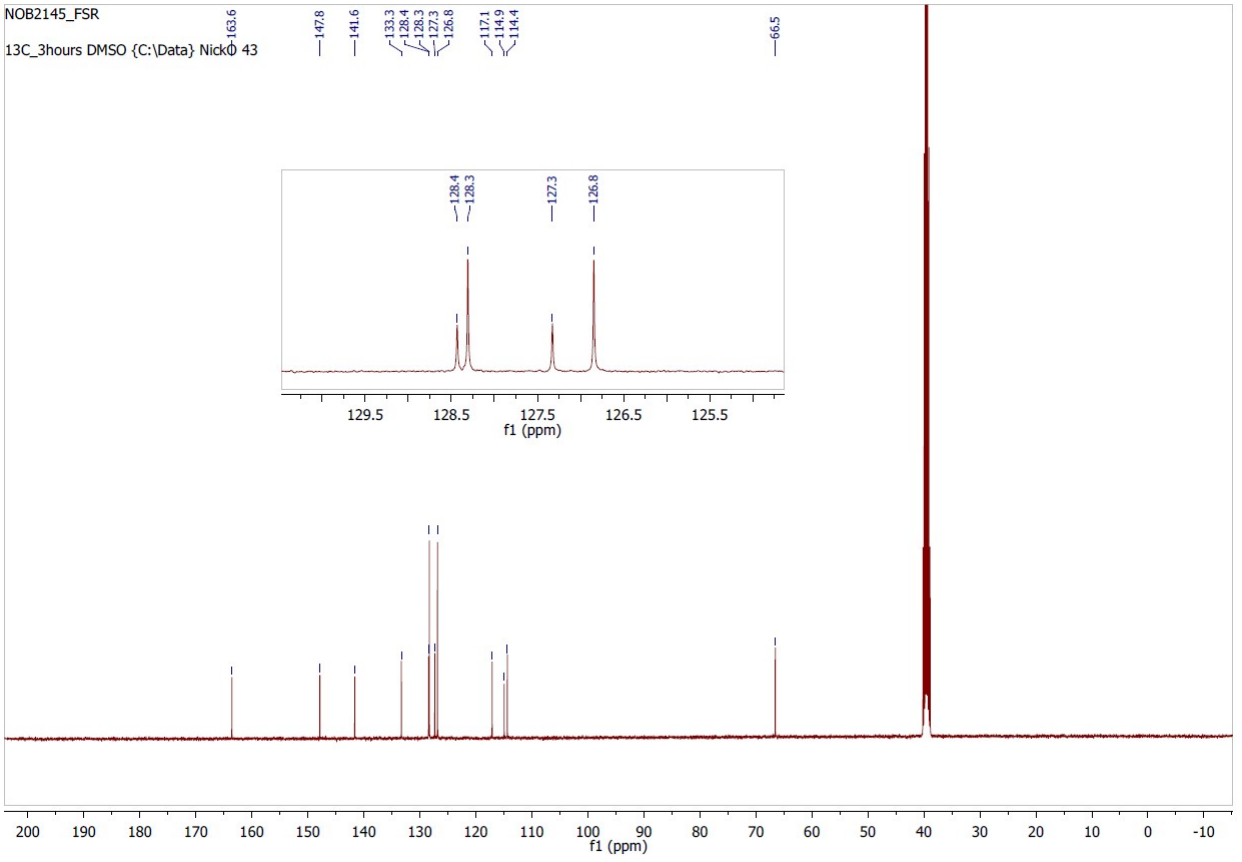

2-(*p*-tolyl)-2,3-dihydroquinazolin-4(1*H*)-one (16)

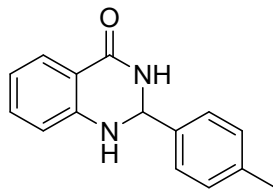

Chemical Formula: C<sub>15</sub>H<sub>14</sub>N<sub>2</sub>O

Exact Mass: 238.11

Molecular Weight: 238.28

IR (neat):  $\nu_{\max}$  = 3312 (NH), 2918 (CH), 1655 (C=O) cm<sup>-1</sup>

<sup>1</sup>H NMR (400 MHz, DMSO-d<sub>6</sub>)  $\delta$  8.22 (s, 1H), 7.60 (dd, *J* = 7.7, 1.4 Hz, 1H), 7.36 (d, *J* = 8.0 Hz, 2H), 7.23 (ddd, *J* = 8.7, 7.3, 1.6 Hz, 1H), 7.18 (d, *J* = 7.9 Hz, 2H), 7.04 (s, 1H), 6.73 (d, *J* = 8.1 Hz, 1H), 6.68 – 6.64 (m, 1H), 5.70 (s, 1H), 2.29 (s, 3H).

<sup>13</sup>C NMR (100 MHz, DMSO-d<sub>6</sub>)  $\delta$  164.1, 148.3, 139.1, 138.2, 133.7, 129.3 (2C), 127.8, 127.2 (2C), 117.54, 115.4, 114.9, 66.8, 21.2.

LRMS (ESI<sup>+</sup>): 239.1 (M+H, C<sub>15</sub>H<sub>15</sub>N<sub>2</sub>O, 100%); LRMS (ESI<sup>-</sup>): 237.2 (M-H, C<sub>15</sub>H<sub>13</sub>N<sub>2</sub>O<sub>3</sub>, 100%).

Mass: 141 mg

m.p. >207.6 °C

yield 60%

off white solid

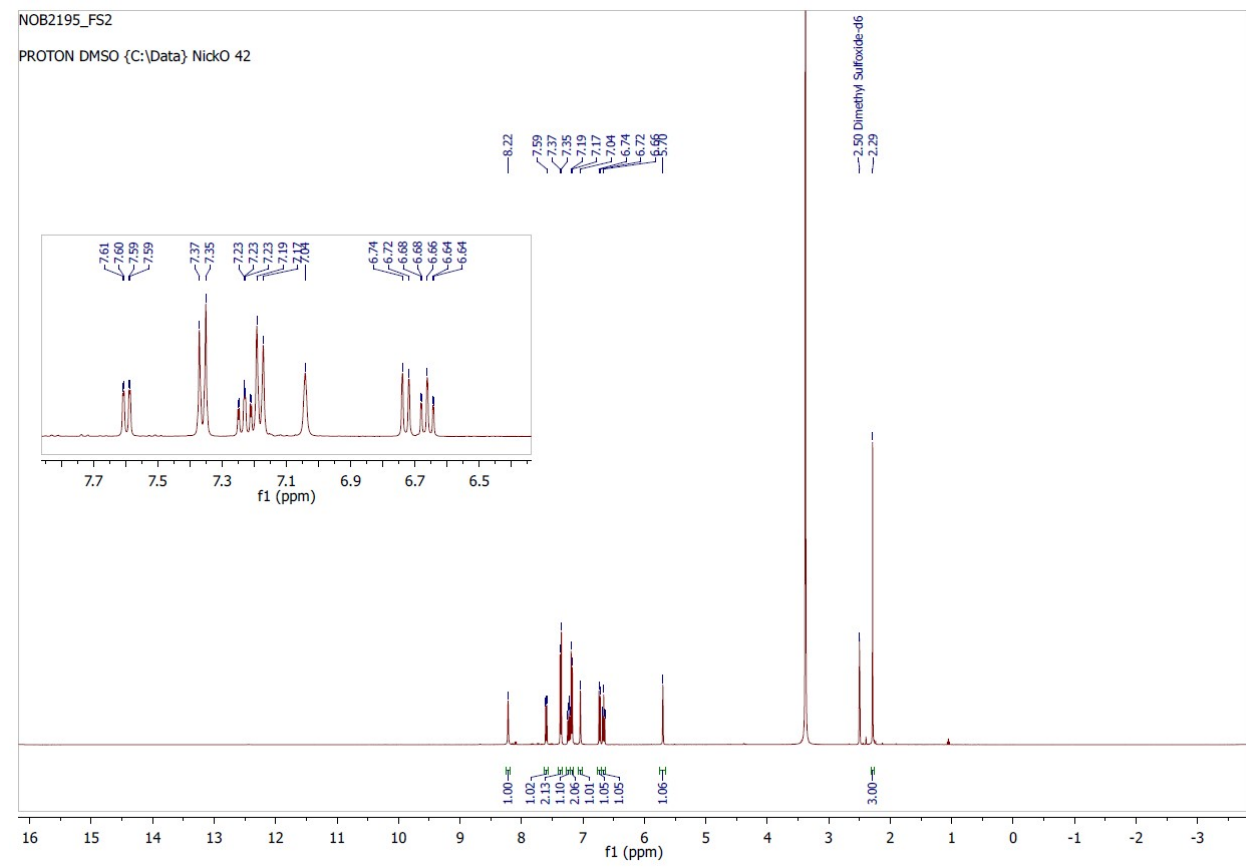

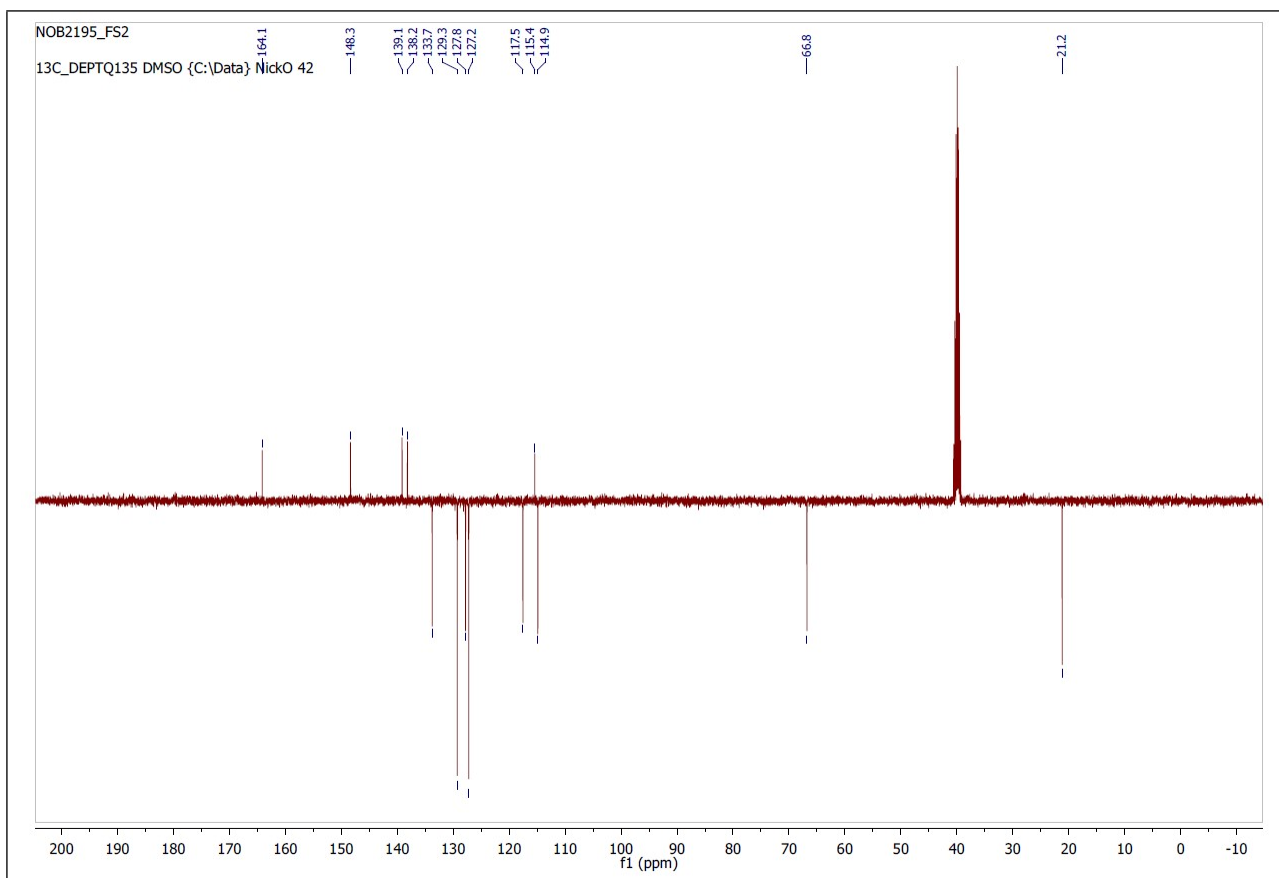

2-(4-(tert-Butyl)phenyl)-2,3-dihydroquinazolin-4(1H)-one (**17**)

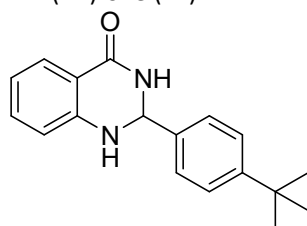

Chemical Formula: C<sub>18</sub>H<sub>20</sub>N<sub>2</sub>O

Exact Mass: 280.16

Molecular Weight: 280.36

**IR** (neat):  $\nu_{\max}$  = 3270 (NH), 1959 (CH), 1651 (C=O) cm<sup>-1</sup>

**<sup>1</sup>H NMR** (400 MHz, DMSO-d<sub>6</sub>)  $\delta$  8.22 (s, 1H), 7.61 (dd,  $J$  = 7.7, 1.4 Hz, 1H), 7.42 (s, 4H), 7.24 (ddd,  $J$  = 8.6, 7.3, 1.6 Hz, 1H), 7.06 (s, 1H), 6.73 (d,  $J$  = 7.8 Hz, 1H), 6.69 – 6.65 (m, 1H), 5.72 (s, 1H), 1.28 (s, 9H).

**<sup>13</sup>C NMR** (100 MHz, DMSO-d<sub>6</sub>)  $\delta$  164.1, 151.5, 148.4, 139.1, 133.7, 127.8, 127.1, 125.6, 117.5, 115.4, 114.8, 66.9, 31.6.

**LRMS** (ESI)  $m/z$  (%): non-ionisable

Mass: 175 mg

m.p. >200°C (dec.)

yield 38%

off white solid



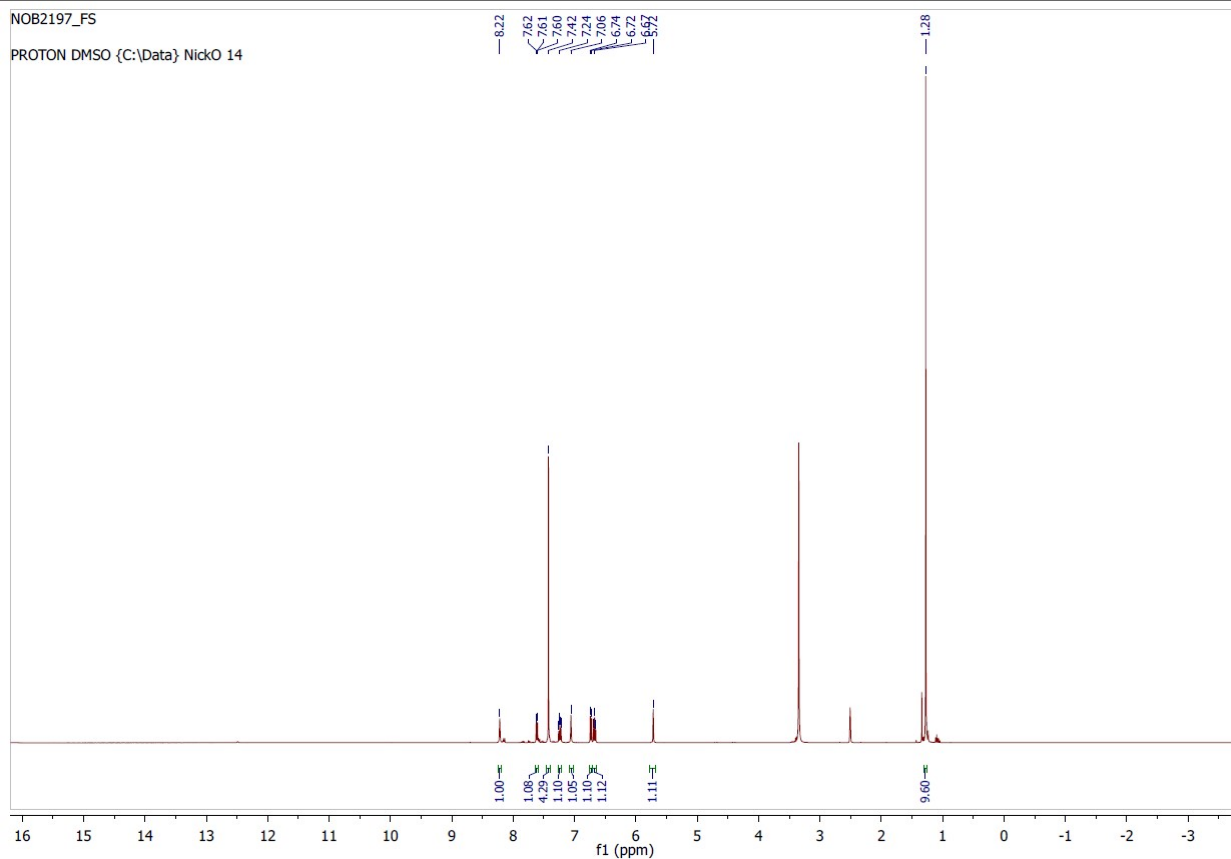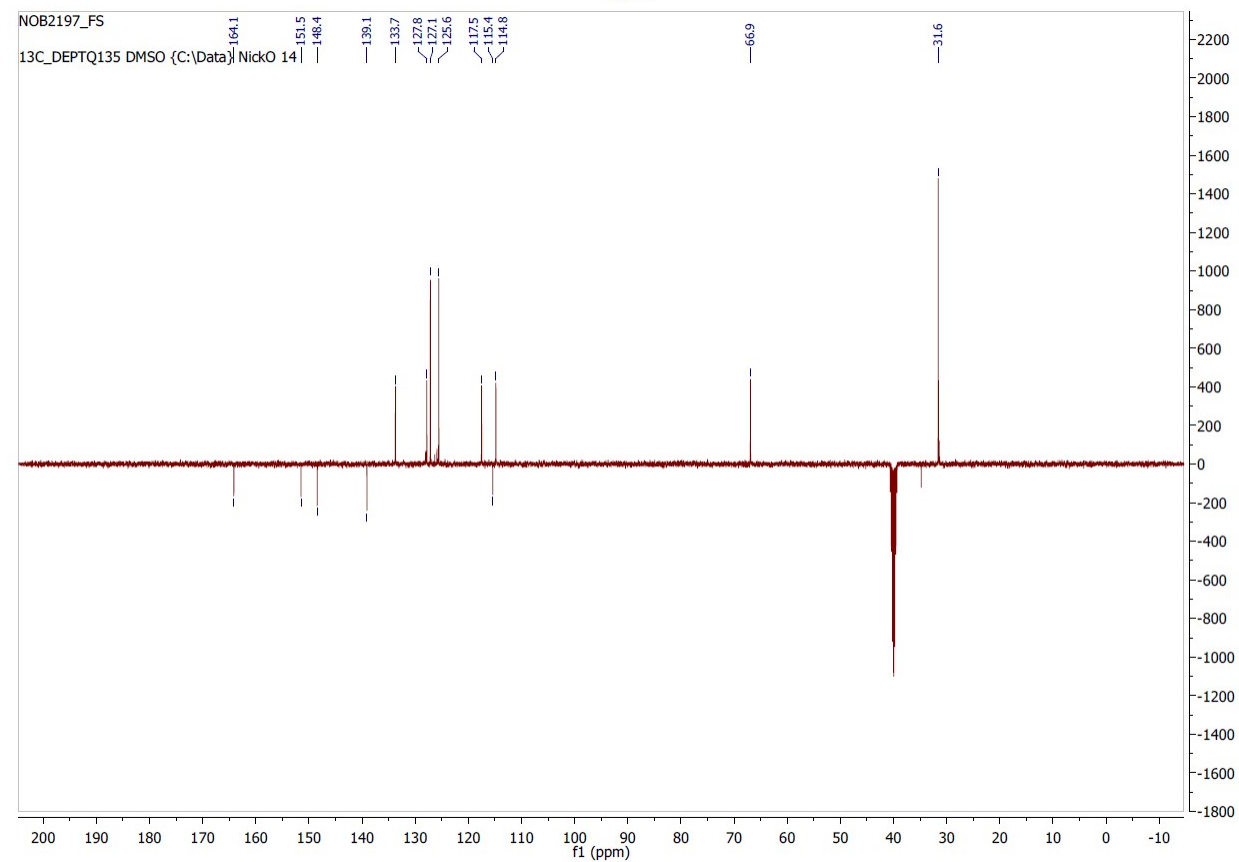

2-(2-bromophenyl)-2,3-dihydroquinazolin-4(1H)-one (**18**)

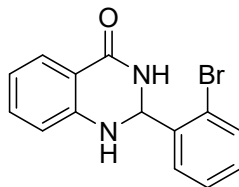

Chemical Formula: C<sub>14</sub>H<sub>11</sub>BrN<sub>2</sub>O

Exact Mass: 302.01

Molecular Weight: 303.15

IR (neat):  $\nu_{\max}$  = 3365 (NH), 1646 (C=O) cm<sup>-1</sup>

<sup>1</sup>H NMR (400 MHz, DMSO-d<sub>6</sub>)  $\delta$  8.19 (s, 1H, NH), 7.69-7.64 (m, 3H), 7.45 (td,  $J$  = 7.5, 1.1 Hz, 1H), 7.33 (ddd,  $J$  = 7.9, 7.4, 1.8 Hz, 1H), 7.26 (ddd,  $J$  = 8.2, 7.2, 1.6 Hz, 1H), 6.98 (s, 1H, NH, H<sub>1</sub>), 6.77-6.70 (m, 2H), 6.09 (s, 1H).

<sup>13</sup>C NMR (100 MHz, DMSO-d<sub>6</sub>)  $\delta$  163.6, 147.7, 139.1, 133.4, 132.8, 130.7, 129.1, 128.1, 127.4, 122.2, 117.5, 114.7, 114.6, 66.4.

LRMS (ESI +)  $m/z$ : 303 (M+H, C<sub>14</sub>H<sub>12</sub><sup>79</sup>BrN<sub>2</sub>O, 100%), 305 (M+H, C<sub>14</sub>H<sub>12</sub><sup>81</sup>BrN<sub>2</sub>O, 95%); (ESI-)  $m/z$ : 301 (M-H, C<sub>14</sub>H<sub>9</sub><sup>79</sup>BrN<sub>2</sub>O, 100%), 303 (M-H, C<sub>14</sub>H<sub>9</sub><sup>81</sup>BrN<sub>2</sub>O, 95%).

Mass: 187 mg

m.p. >173°C (decomp.)

Yield: 40 %

White crystalline solid

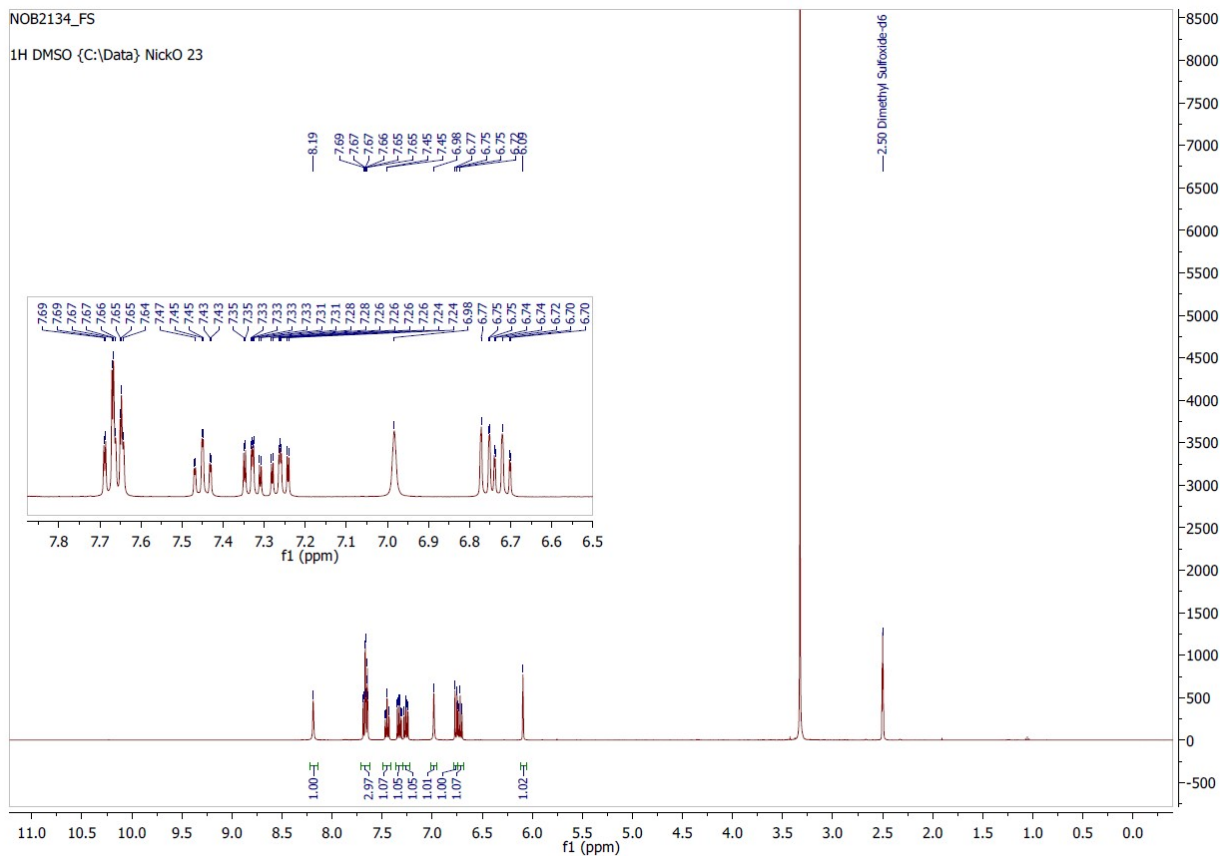

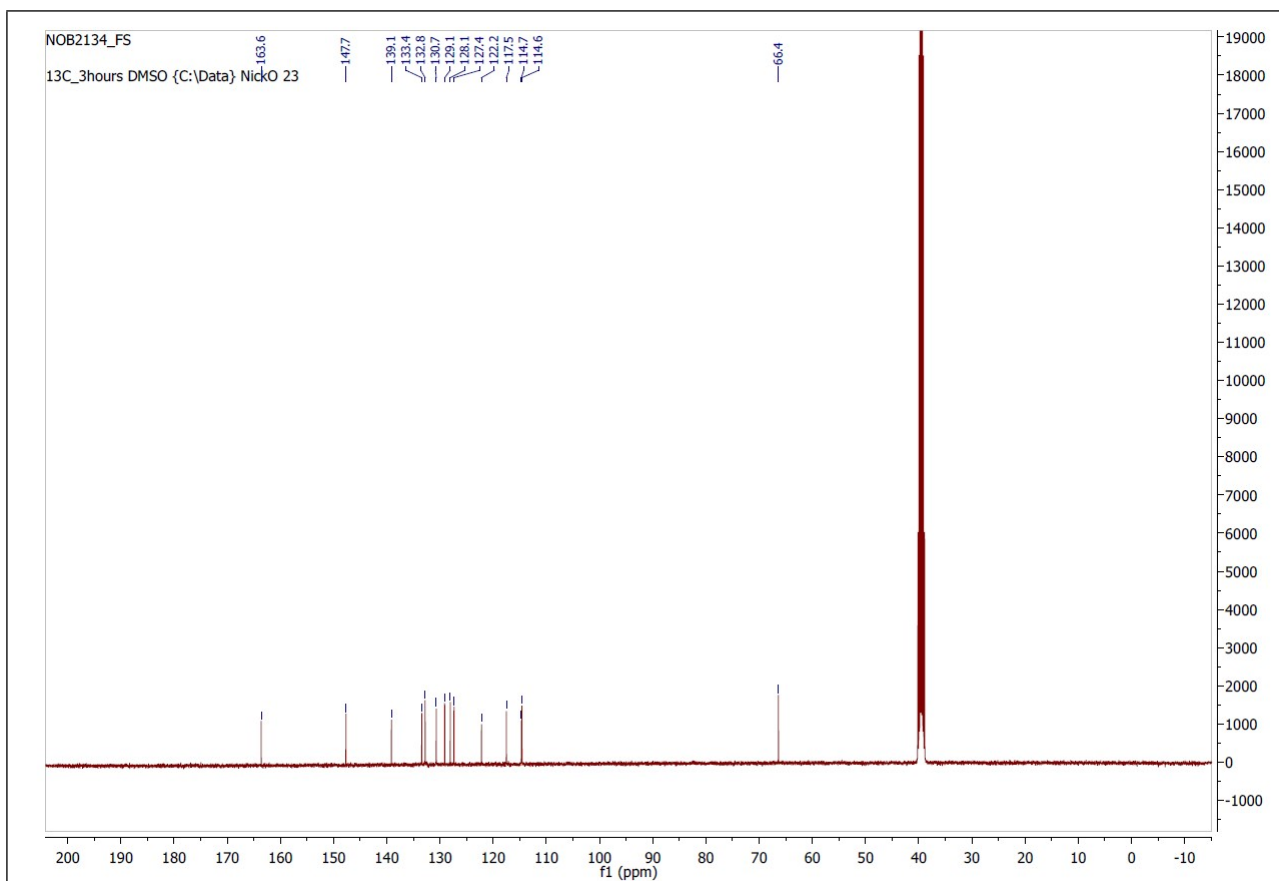

2-(3-bromophenyl)-2,3-dihydroquinazolin-4(1H)-one (**19**)

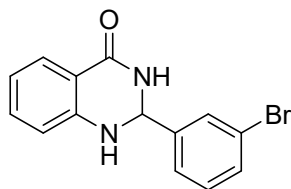

Chemical Formula:  $C_{14}H_{11}BrN_2O$

Exact Mass: 302.01

Molecular Weight: 303.15

**IR** (neat):  $\nu_{max}$  = 3282 (NH), 3172 (NH), 3062 (CH), 1645 (C=O)  $cm^{-1}$

**$^1H$  NMR** (400 MHz, DMSO- $d_6$ )  $\delta$  8.39 (s, 1H), 7.65 (t,  $J$  = 1.7 Hz, 1H), 7.60 (dd,  $J$  = 7.7, 1.4 Hz, 1H), 7.52 (ddd,  $J$  = 7.9, 1.8, 1.0 Hz, 1H), 7.47 (d,  $J$  = 7.8 Hz, 1H), 7.34 (t,  $J$  = 7.8 Hz, 1H), 7.25 (ddd,  $J$  = 8.6, 7.3, 1.6 Hz, 1H), 7.20 (s, 1H), 6.75 (d,  $J$  = 7.8 Hz, 1H), 6.72 – 6.64 (m, 1H), 5.76 (s, 1H).

**$^{13}C$  NMR** (100 MHz, DMSO- $d_6$ )  $\delta$  163.60, 147.54, 144.75, 133.68, 131.29, 130.74, 129.67, 127.50, 125.84, 121.72, 117.51, 114.93, 114.60, 65.54.

**LRMS** (ESI +)  $m/z$ : 303 (M+H,  $C_{14}H_{12}^{79}BrN_2O$ , 100%), 305 (M+H,  $C_{14}H_{12}^{81}BrN_2O$ , 90%); (ESI-)  $m/z$ : 301 (M-H,  $C_{14}H_{10}^{79}BrN_2O$ , 100%), 303 (M-H,  $C_{14}H_{10}^{81}BrN_2O$ , 90%).

Mass: 491 mg

M.p. >174°C (decomp.)

Yield: 96%

White crystalline solid

NOB2132\_FSR\_proton  
PROTON DMSO {C:\Data} NickO 41

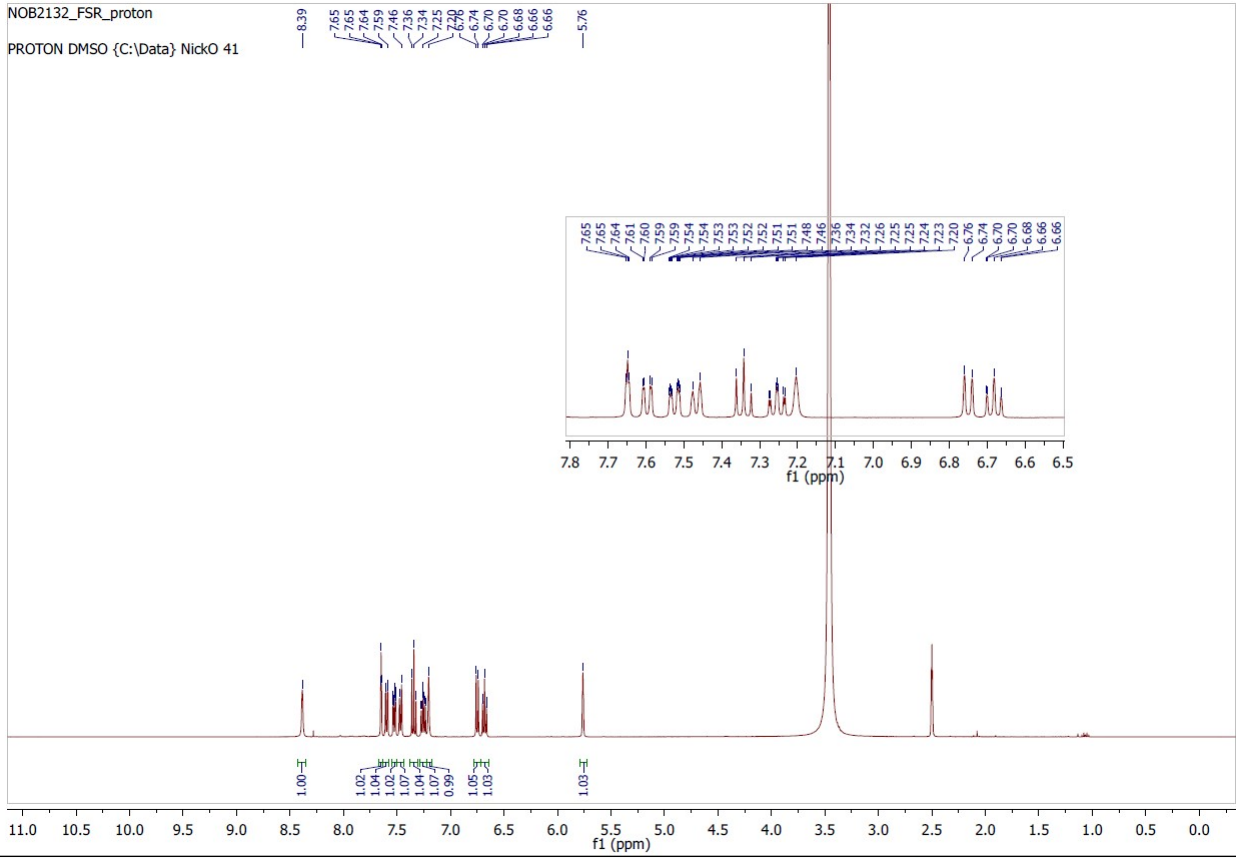

NOB2132\_FSR  
13C\_3hours DMSO {C:\Data} NickO 41

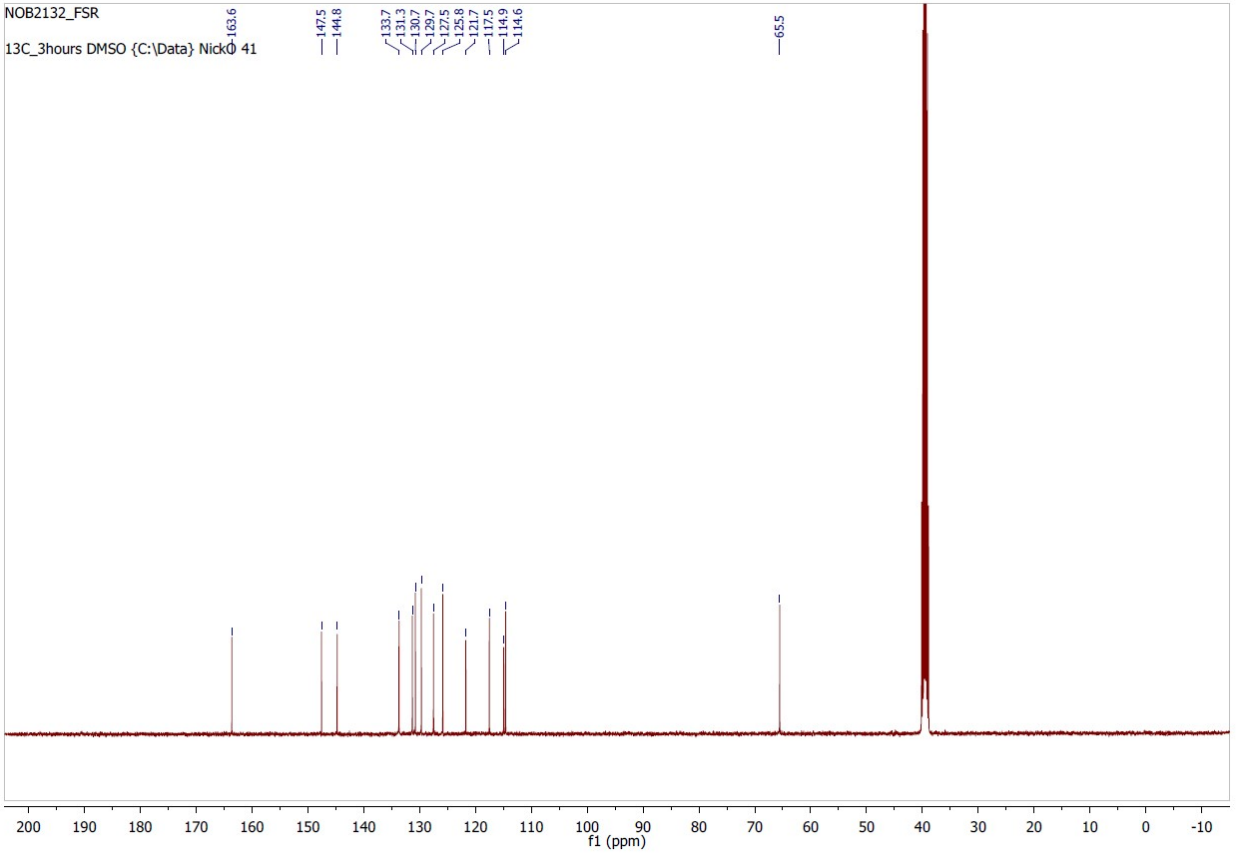

2-(4-bromophenyl)-2,3-dihydroquinazolin-4(1H)-one (**20**)

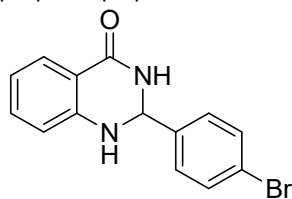

Chemical Formula: C<sub>14</sub>H<sub>11</sub>BrN<sub>2</sub>O

Exact Mass: 302.01

Molecular Weight: 303.15

IR (neat):  $\nu_{\max}$  = (3308, N-H), 1652 (C=O) cm<sup>-1</sup>

<sup>1</sup>H NMR (400 MHz, DMSO-d<sub>6</sub>)  $\delta$  8.32 (s, 1H, NH), 7.61-7.57 (m, 3H), 7.44 – 7.42 (m, 2H), 7.25 (ddd, *J* = 8.2, 7.2, 1.6 Hz, 1H), 7.13 (s, 1H, NH), 6.74 (dd, *J* = 8.1, 0.5 Hz), 6.70 – 6.66 (m, 1H), 5.75 (s, 1H).

<sup>13</sup>C NMR (100 MHz, DMSO-d<sub>6</sub>)  $\delta$  163.5, 147.6, 141.1, 133.4, 131.2 (2C), 129.1 (2C), 127.4, 121.6, 117.3, 114.9, 114.5, 65.8.

LRMS (ESI +) *m/z*: 303 (M+H, C<sub>14</sub>H<sub>12</sub><sup>79</sup>BrN<sub>2</sub>O, 100%), 305 (M+H, C<sub>14</sub>H<sub>12</sub><sup>81</sup>BrN<sub>2</sub>O, 95%), 347 (M+FA-H, C<sub>14</sub>H<sub>12</sub><sup>79</sup>BrN<sub>2</sub>O, 100%), 349 (M+FA-H, C<sub>14</sub>H<sub>12</sub><sup>81</sup>BrN<sub>2</sub>O, 95%); (ESI-) *m/z*: 301 (M-H, C<sub>14</sub>H<sub>10</sub><sup>79</sup>BrN<sub>2</sub>O, 100%), 303 (M-H, C<sub>14</sub>H<sub>10</sub><sup>81</sup>BrN<sub>2</sub>O, 95%).

Mass: 418 mg

m.p.: >191°C (decomp.)

Yield: 94 %

White crystalline solid

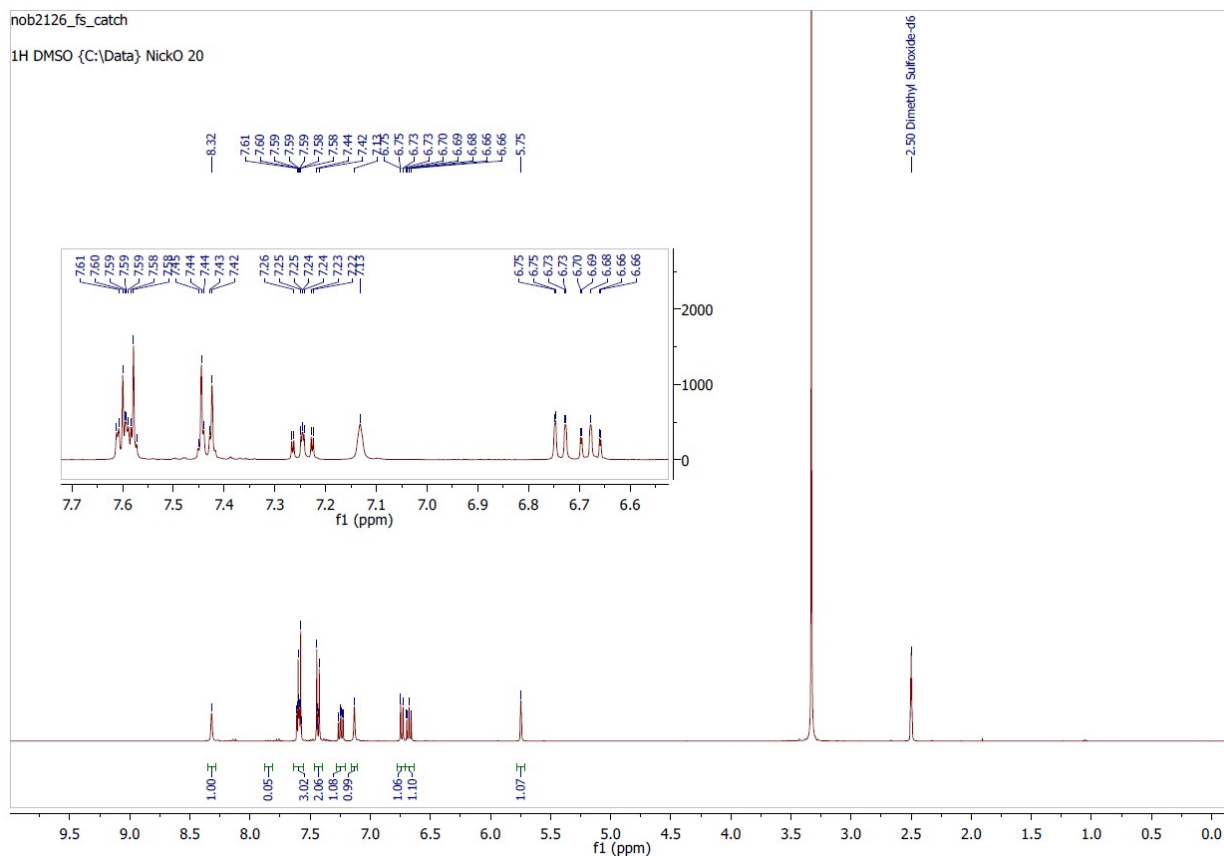

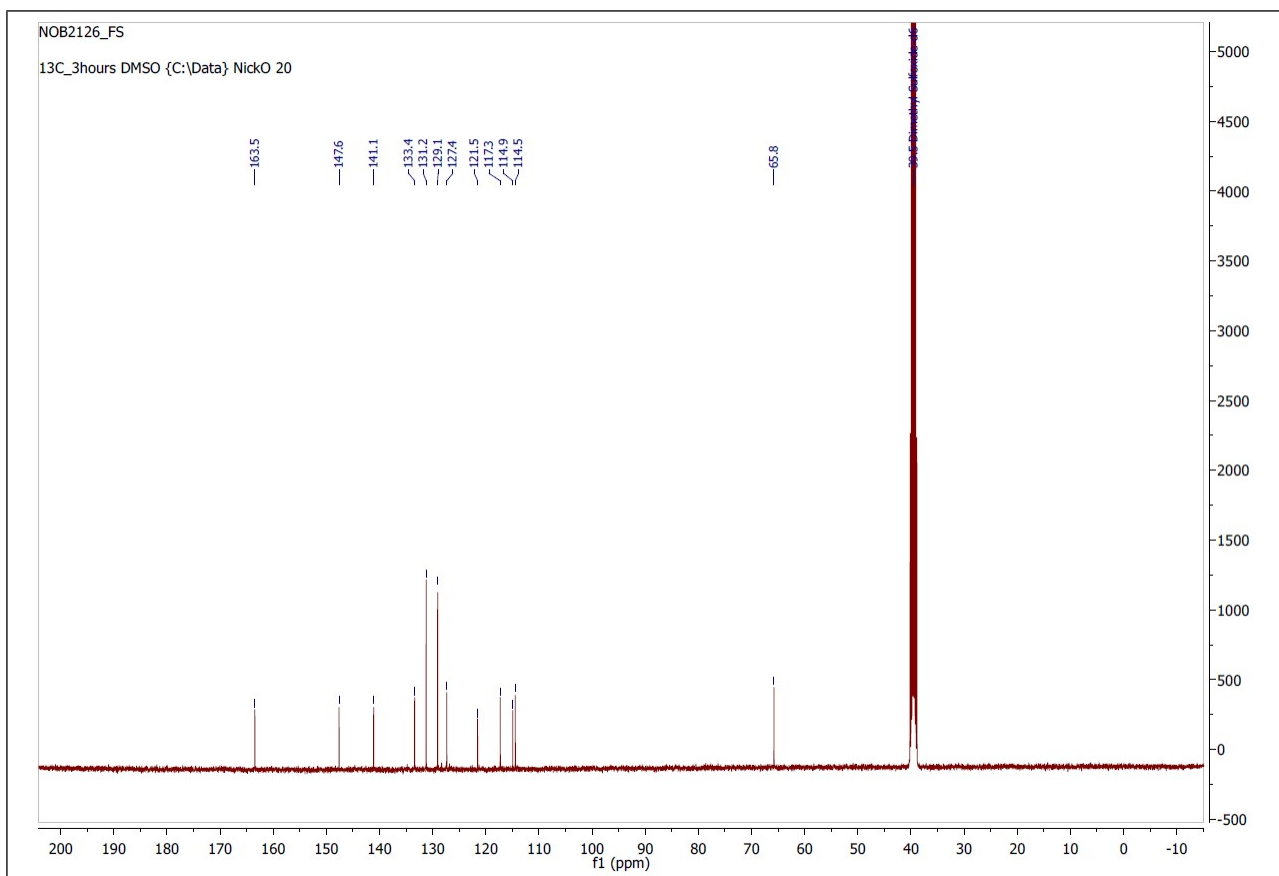

2-(3-hydroxyphenyl)-2,3-dihydroquinazolin-4(1H)-one (**21**)

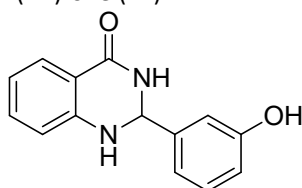

Chemical Formula:  $C_{14}H_{12}N_2O_2$

Exact Mass: 240.09

Molecular Weight: 240.26

**IR** (neat):  $\nu_{\max}$  = 3282 (NH), 3100 (OH) 1650 (C=O)  $cm^{-1}$

**$^1H$  NMR** (400 MHz, DMSO- $d_6$ )  $\delta$  9.52 (d,  $J$  = 1.7 Hz, 1H), 8.22 (s, 1H), 7.59 (dd,  $J$  = 7.7, 1.4 Hz, 1H), 7.27 – 7.19 (m, 1H), 7.16 (t,  $J$  = 8.1 Hz, 1H), 7.06 (s, 1H), 6.88 (t,  $J$  = 4.0 Hz, 2H), 6.72 (ddd,  $J$  = 7.1, 3.1, 1.8 Hz, 2H), 6.69 – 6.62 (m, 1H), 5.64 (s, 1H).

**$^{13}C$  NMR** (100 MHz, DMSO- $d_6$ )  $\delta$  163.7, 157.4, 147.9, 143.3, 133.4, 129.4, 127.4, 117.5, 117.1, 115.4, 114.9, 114.4, 113.7, 66.5.

**LRMS** (ESI+): 241.1 (M+H,  $C_{14}H_{13}N_2O_2$ , 100%), 481.2 (2M+H,  $C_{14}H_{13}N_2O_2$ , 10%); (ESI-) 239.1 (M-H,  $C_{14}H_{11}N_2O_2$ , 100%), 479.2 (2M+H,  $C_{14}H_{11}N_2O_2$ , 50%).

Mass 260.3 mg

m.p. 206 – 209 °C

Yield: 67%

White solid

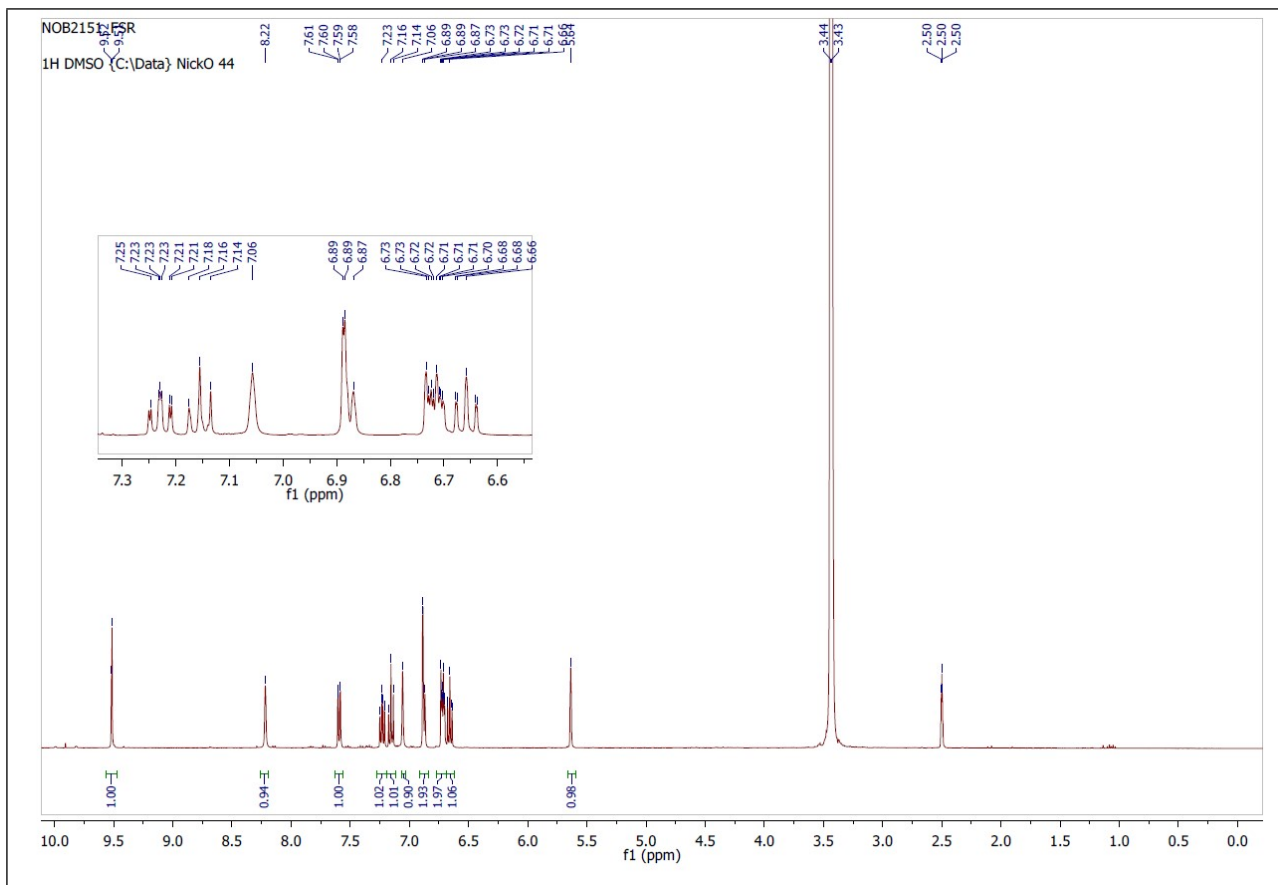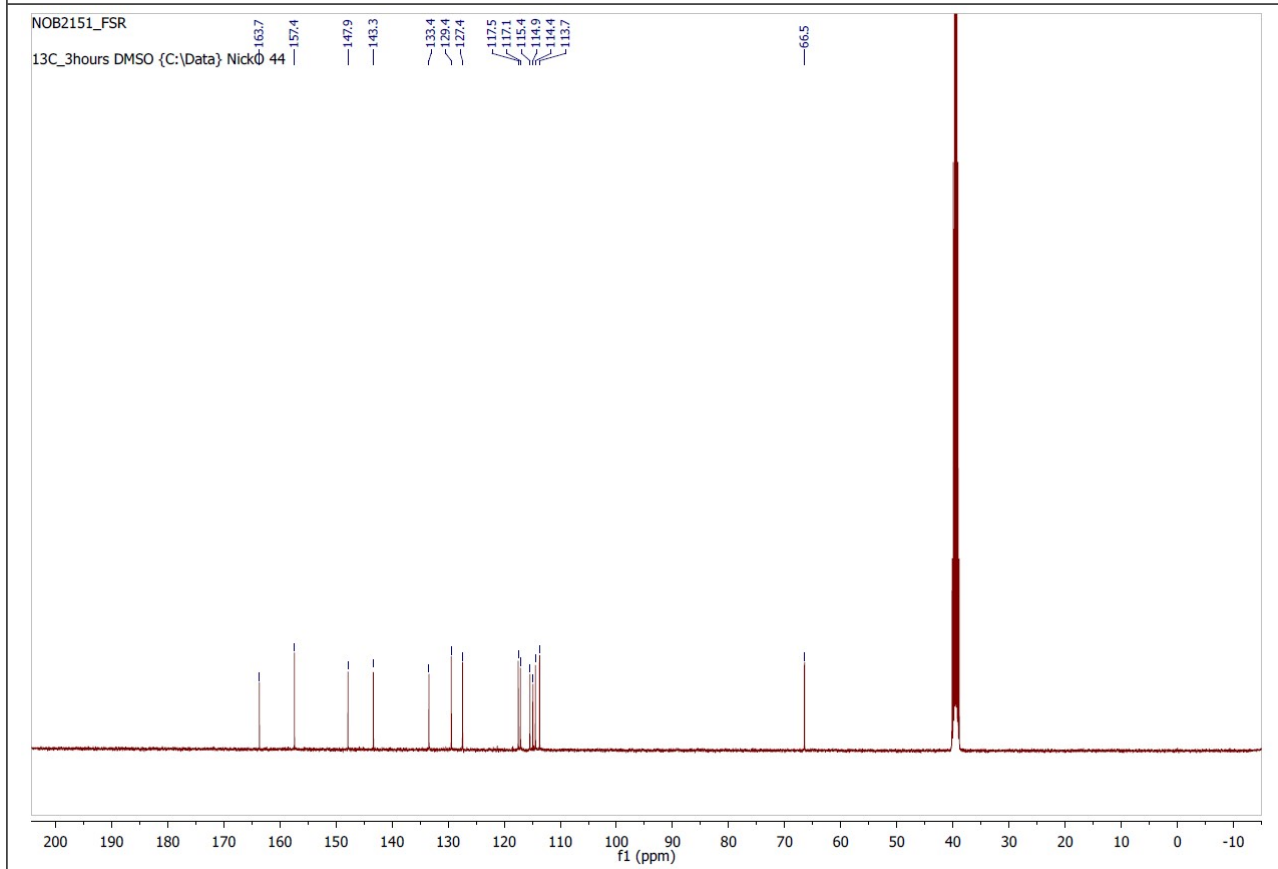

2-(4-hydroxyphenyl)-2,3-dihydroquinazolin-4(1H)-one (22)

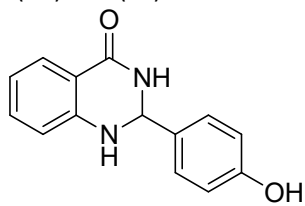

Chemical Formula: C<sub>14</sub>H<sub>12</sub>N<sub>2</sub>O<sub>2</sub>

Exact Mass: 240.09

Molecular Weight: 240.26

IR (neat):  $\nu_{\max}$  = 3346 (NH), 3175 (NH), 1229 (C=O) cm<sup>-1</sup>

<sup>1</sup>H NMR (400 MHz, DMSO-d<sub>6</sub>)  $\delta$  9.53 (s, 1H), 8.09 (d,  $J$  = 4.3 Hz, 1H), 7.61 (dd,  $J$  = 7.7, 1.5 Hz, 1H), 7.32 – 7.29 (m, 2H), 7.24 (ddd,  $J$  = 8.3, 7.2, 1.6 Hz, 1H), 6.94 (s, 1H), 6.79 – 6.66 (m, 4H), 5.66 (s, 1H).

<sup>13</sup>C NMR (100 MHz, DMSO-d<sub>6</sub>)  $\delta$  164.2, 158.1, 148.6, 133.7, 132.1, 128.7 (2C), 127.8, 117.5, 115.4 (2C), 114.8, 67.1.

LRMS (ESI+): 241.1 (M+H, C<sub>14</sub>H<sub>13</sub>N<sub>2</sub>O<sub>2</sub>, 100%); (ESI-) 239.1 (M-H, C<sub>14</sub>H<sub>12</sub>N<sub>2</sub>O<sub>2</sub>, 100%).

Mass 163 mg

m.p. >200°C (decomp.)

Yield: 39%

White solid

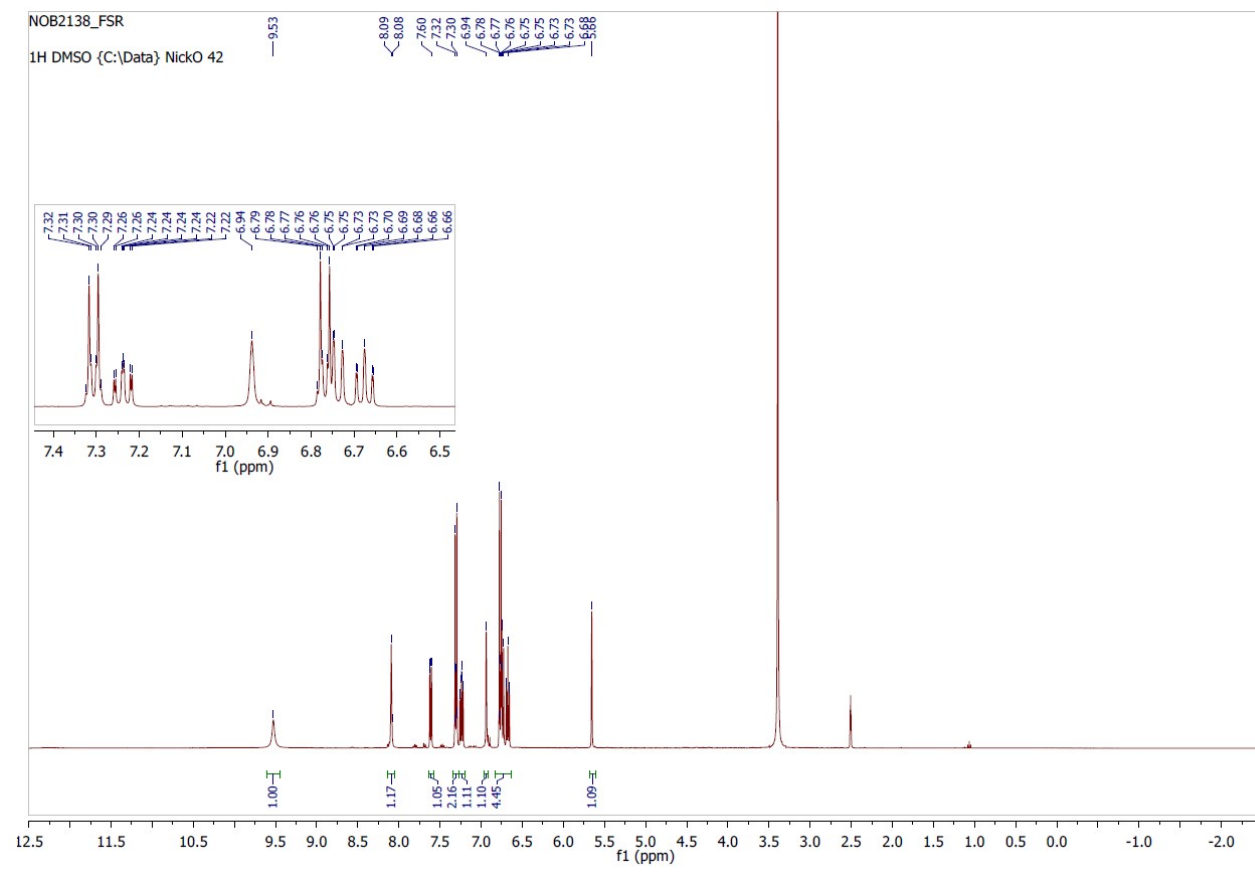



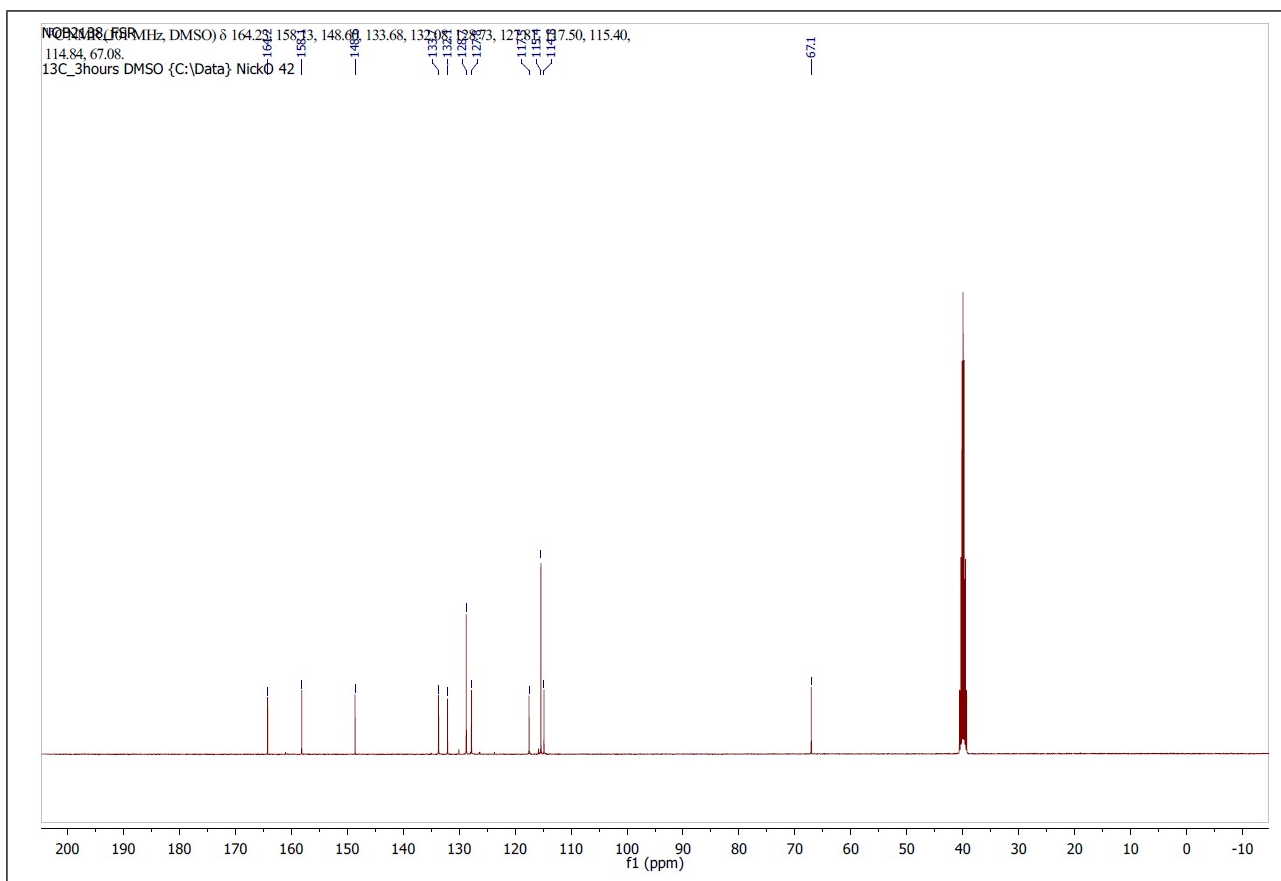

2-(2-Carboxyphenyl)-2,3-dihydroquinazolin-4(1H)-one (**23**)

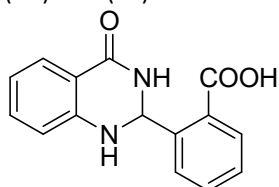

Chemical Formula:  $C_{15}H_{12}N_2O_3$

Exact Mass: 268.08

Molecular Weight: 268.27

**IR** (neat):  $\nu_{max}$  = 3282 (NH), 3036 (NH), 1726 (C=O), 1674 (C=O)  $cm^{-1}$

**$^1H$  NMR** (400 MHz, DMSO- $d_6$ )  $\delta$  9.48 (s, 1H), 8.22 (s, 1H), 7.60 (dd,  $J$  = 7.7, 1.5 Hz, 1H), 7.23 (ddd,  $J$  = 8.2, 7.2, 1.6 Hz, 1H), 7.16 (t,  $J$  = 7.9 Hz, 1H), 7.06 (s, 1H), 6.89 (t,  $J$  = 4.3 Hz, 2H), 6.76 – 6.69 (m, 2H), 6.69 – 6.63 (m, 1H), 5.64 (s, 1H).

**$^{13}C$  NMR** (100 MHz, DMSO- $d_6$ )  $\delta$  163.50, 157.34, 147.81, 143.22, 133.27, 129.31, 127.33, 117.43, 116.98, 115.33, 114.86, 114.33, 113.65, 66.45, 39.52.

**LRMS** (ESI+): 251.1 (M+H- $H_2O$ ,  $C_{15}H_{11}N_2O_2$ , 100%); (ESI-): 249.1 (M-H- $H_2O$ ,  $C_{15}H_9N_2O_2$ , 100%)

Mass: 251.8 mg

m.p. >240 °C (decomp.)

Yield: 58%

Amorphous yellow solid

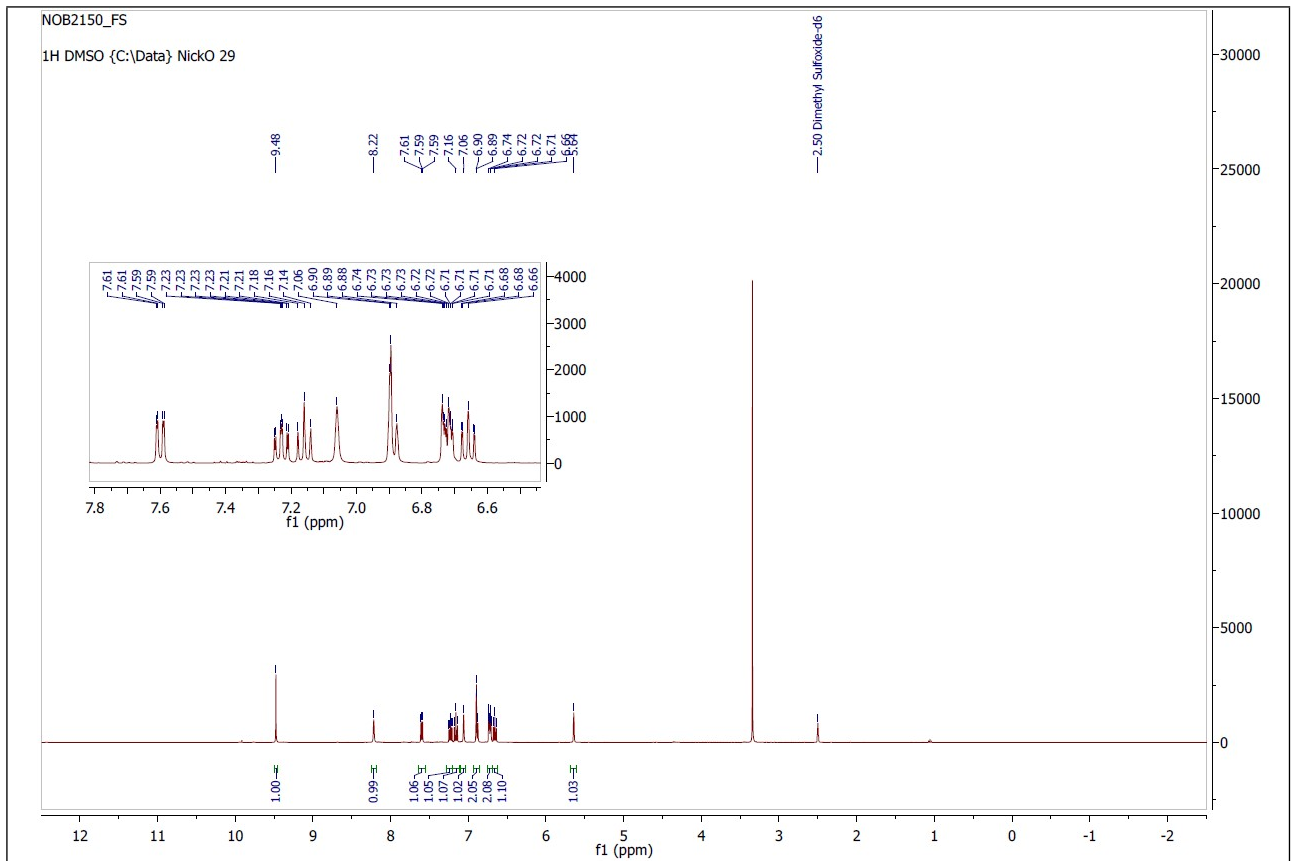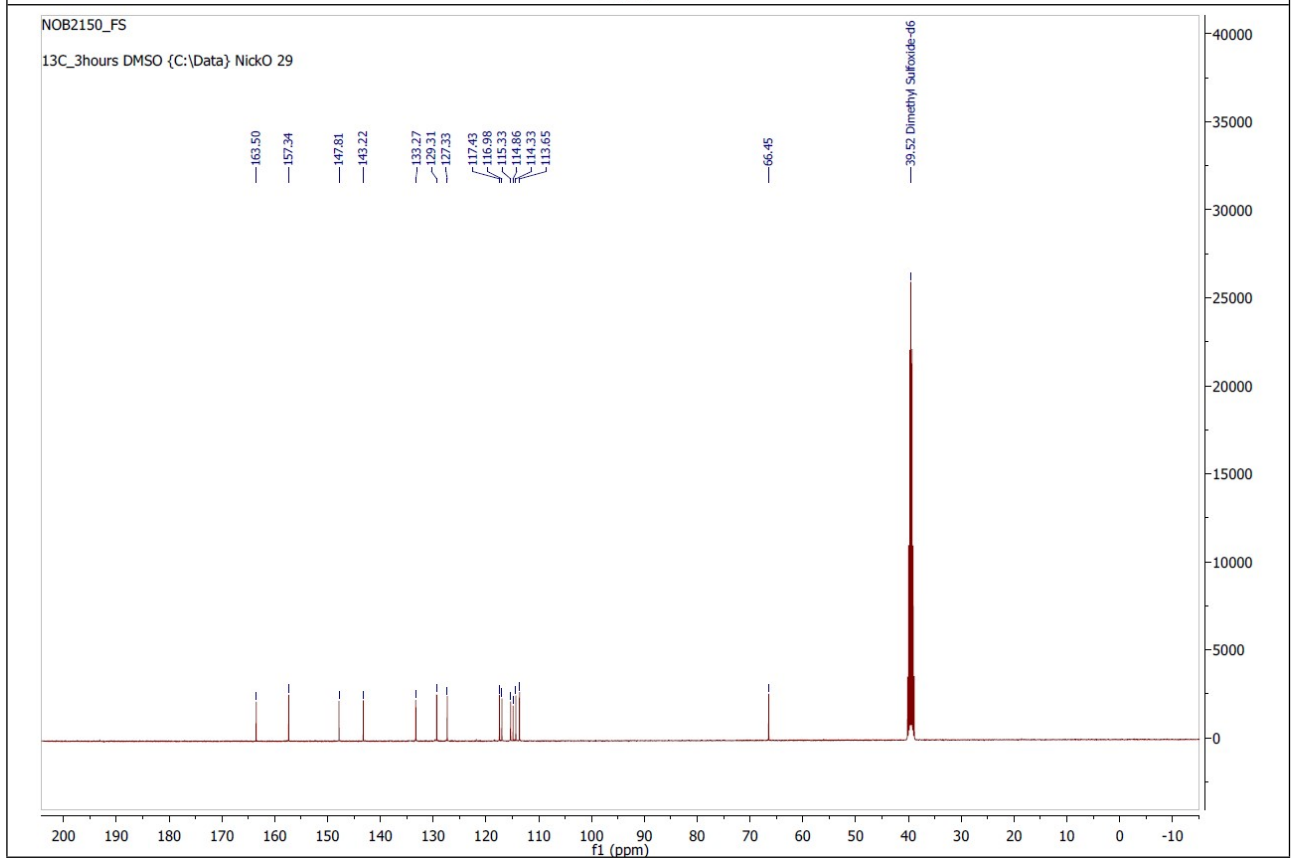

2-(3-Carboxyphenyl)-2,3-dihydroquinazolin-4(1H)-one (**24**)

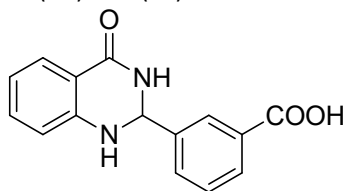

Chemical Formula: C<sub>15</sub>H<sub>12</sub>N<sub>2</sub>O<sub>3</sub>

Exact Mass: 268.08

Molecular Weight: 268.27

IR (neat):  $\nu_{\max}$  = 3334 (NH), 3200 (NH), 1666 (C=O), 750.5 (C=C) cm<sup>-1</sup>

<sup>1</sup>H NMR (400 MHz, DMSO-d<sub>6</sub>)  $\delta$  8.38 (s, 1H), 8.08 (s, 1H), 7.90 (dt, 1H), 7.71 (dt, 1H), 7.60 (dd, *J* = 7.8, 1.5 Hz, 1H), 7.51 (t, *J* = 9.6, 1H), 7.25 (ddd, *J* = 8.2, 7.2, 1.6 Hz, 1H), 7.19 (s, 1H), 6.74 (d, 1H), 6.71 – 6.65 (m, 1H), 5.83 (s, 1H).

<sup>13</sup>C NMR (100 MHz, DMSO-d<sub>6</sub>)  $\delta$  167.4, 163.8, 147.8, 142.5, 133.8, 131.5, 131.1, 129.5, 129.0, 127.9, 127.6, 117.6, 115.0, 114.7, 66.1.

LRMS (ESI+): 269.2 (M+H, C<sub>15</sub>H<sub>13</sub>N<sub>2</sub>O<sub>3</sub>, 100%); (ESI-): 267.1 (M-H, C<sub>15</sub>H<sub>15</sub>N<sub>2</sub>O<sub>3</sub>, 100%), 535.2 (2M-H, C<sub>15</sub>H<sub>15</sub>N<sub>2</sub>O<sub>3</sub>, 100%).

Mass: 398 mg

m.p. >300 °C

Yield: 86%

White solid

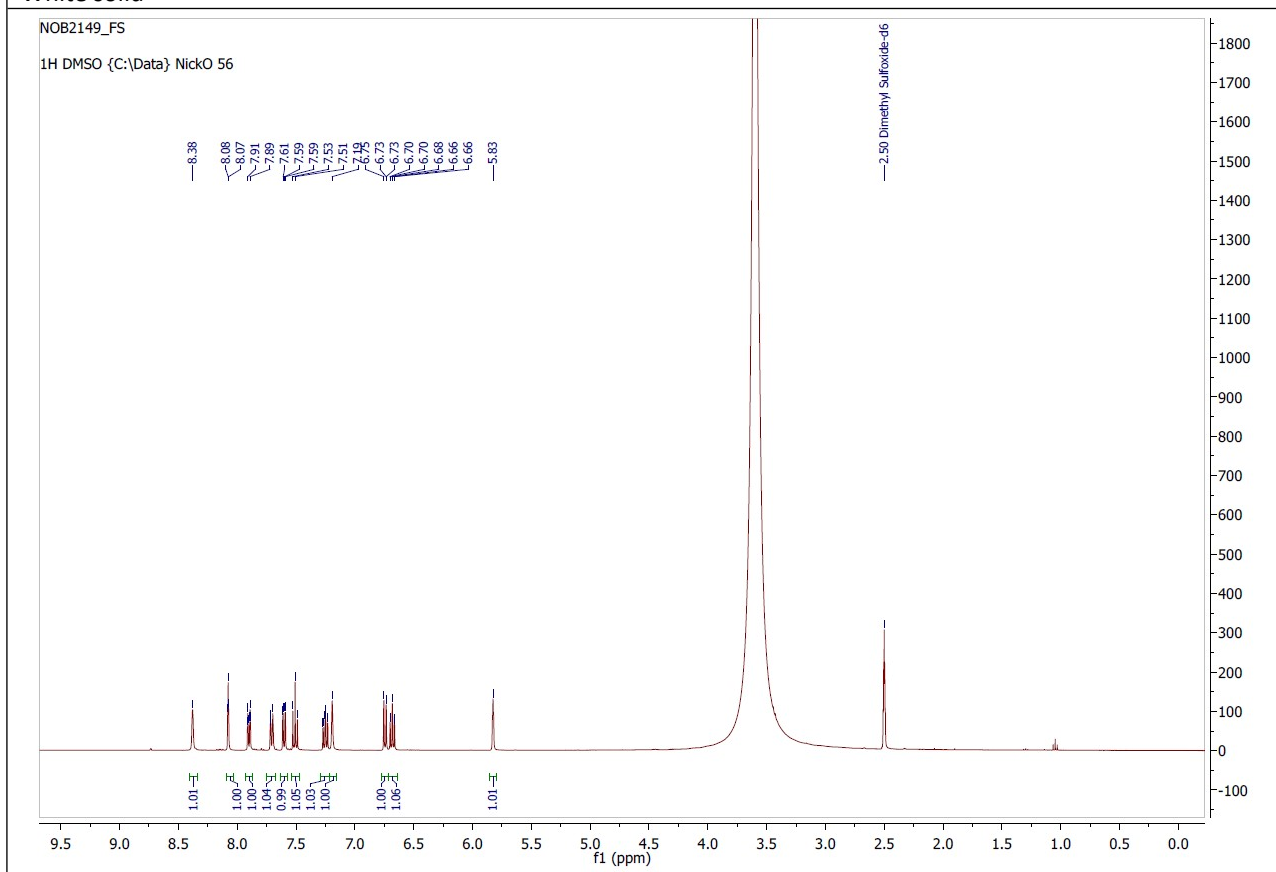

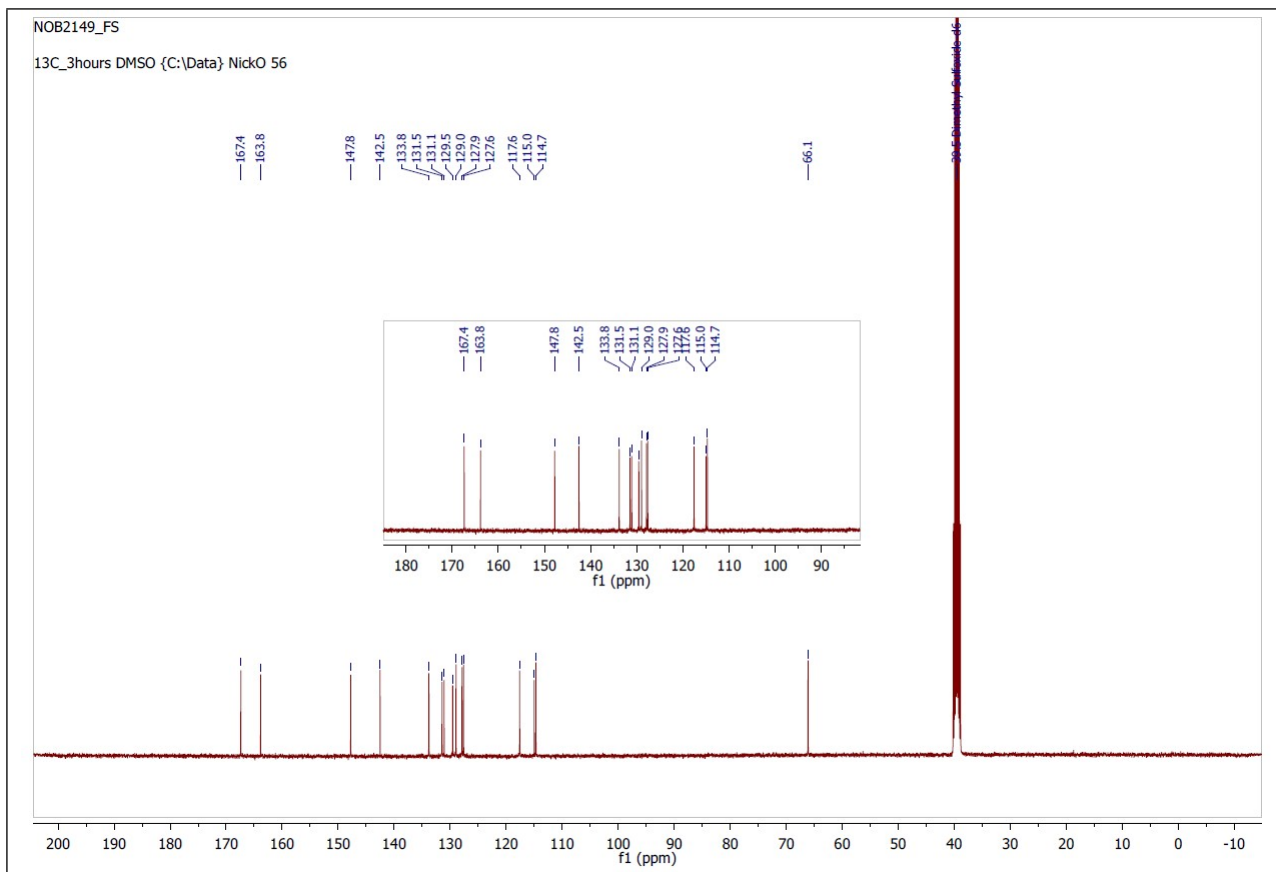

4-(4-oxo-1,2,3,4-tetrahydroquinazolin-2-yl)benzoic acid (**25**)

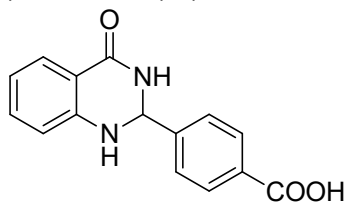

Chemical Formula:  $C_{15}H_{12}N_2O_3$

Exact Mass: 268.08

Molecular Weight: 268.27

**IR** (neat):  $\nu_{\max}$  = 3289 (NH), 2800 (OH), 1695 (C=O), 725 (C=C)  $cm^{-1}$

**$^1H$  NMR** (400 MHz, DMSO- $d_6$ )  $\delta$  8.38 (s, 1H), 7.94 – 7.92 (m, 2H), 7.60 (dd,  $J$  = 12.0, 4.9 Hz, 3H), 7.25 (ddd,  $J$  = 8.7, 7.3, 1.6 Hz, 1H), 7.20 (s, 1H), 6.74 (d,  $J$  = 7.7 Hz, 1H), 6.70 – 6.68 (m, 1H), 5.82 (s, 1H).

**$^{13}C$  NMR** (100 MHz, DMSO- $d_6$ )  $\delta$  167.3, 163.8, 147.7, 146.7, 133.8, 131.0 (2C), 129.6, 127.6, 127.1 (2C), 117.6, 115.0, 114.7, 66.1.

**MS Analysis (low res):** LRMS (ESI+): 269.2 (M+H,  $C_{15}H_{13}N_2O_3$ , 100%); (ESI-): 267.1 (M-H,  $C_{15}H_{11}N_2O_3$ , 100%).

Mass: 341.0 mg

m.p. >300°C

Yield 75 %

White solid

NOB2148\_FS

1H DMSO (C:\Data) NickO 55

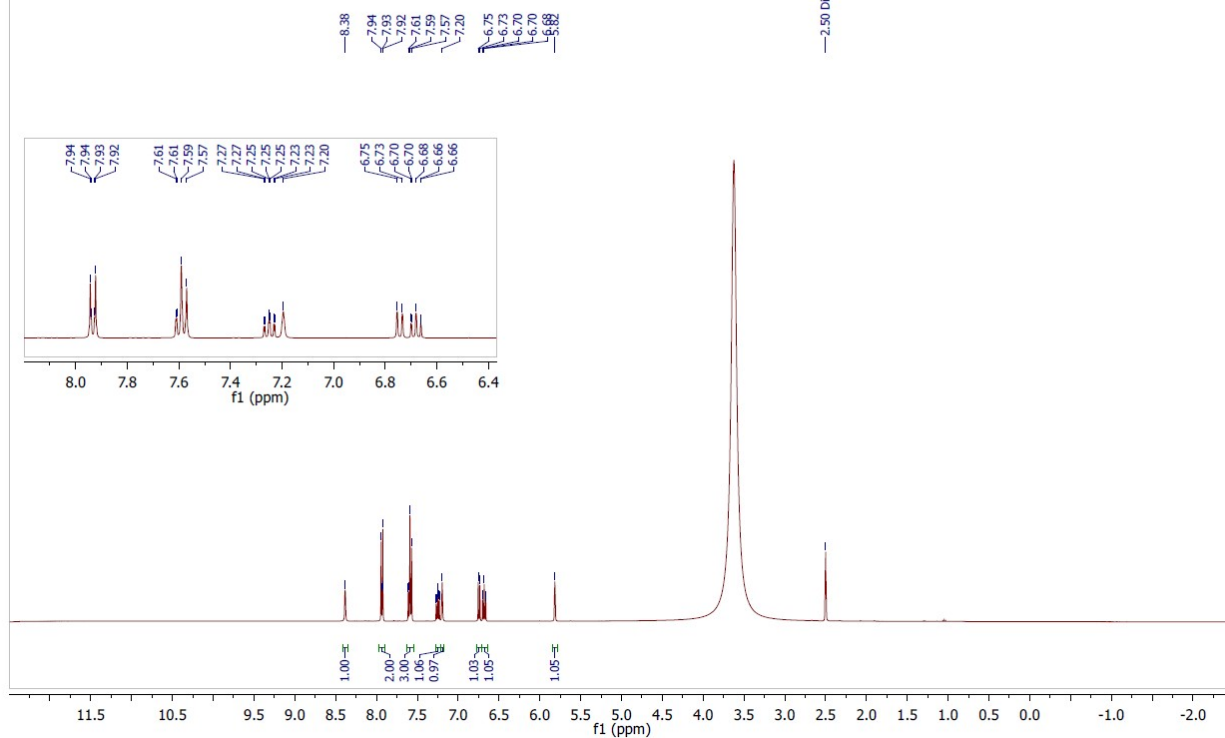

NOB2148\_FS

13C\_3hours DMSO (C:\Data) NickO 55

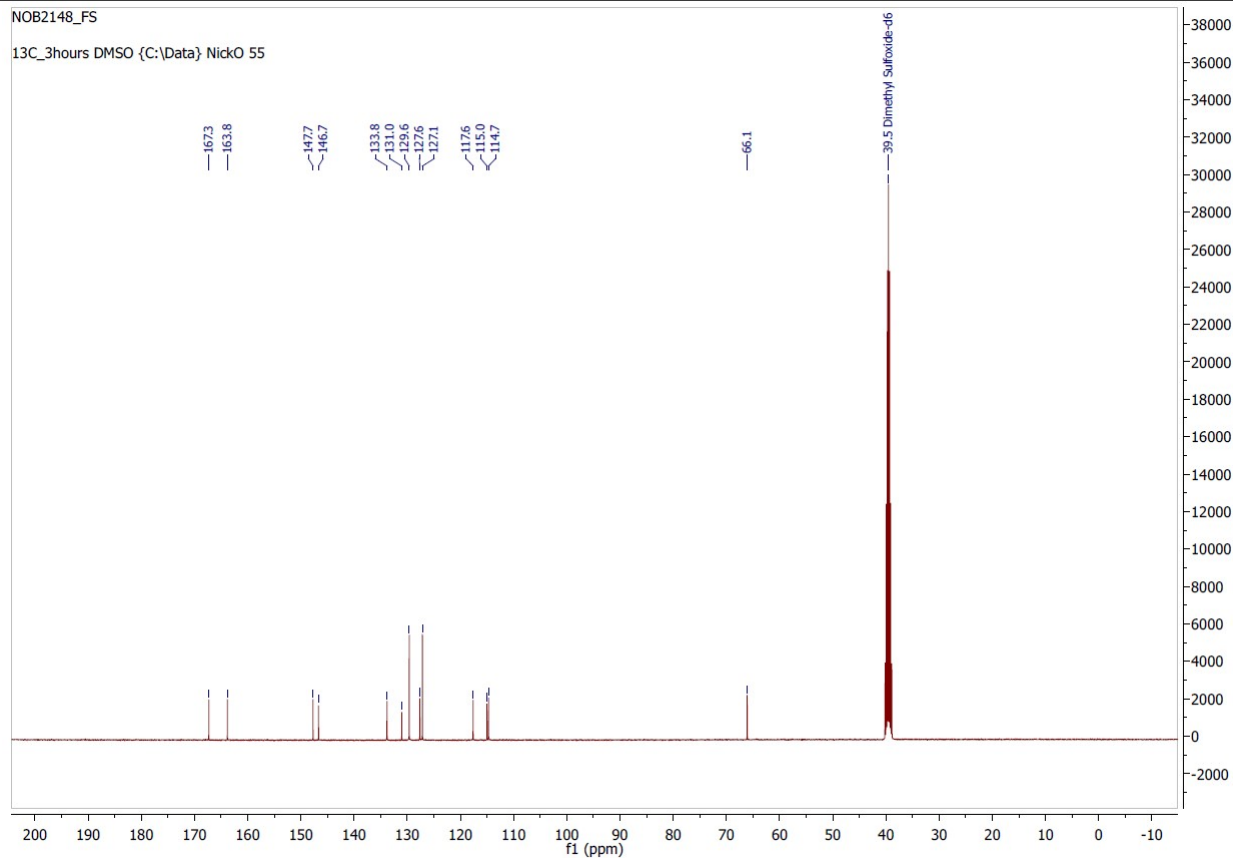

2-(2-nitrophenyl)-2,3-dihydroquinazolin-4(1H)-one (26)

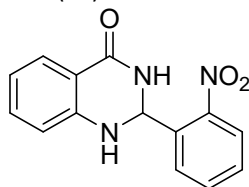

Chemical Formula: C<sub>15</sub>H<sub>12</sub>N<sub>2</sub>O<sub>3</sub>

Exact Mass: 268.08

Molecular Weight: 268.27

IR (neat):  $\nu_{\max}$  = 3409 (NH), 3182 (NO), 1654 (C=O) cm<sup>-1</sup>

<sup>1</sup>H NMR (400 MHz, DMSO-d<sub>6</sub>)  $\delta$  8.21 (s, 1H), 8.06 (dd, *J* = 8.1, 0.9 Hz, 1H), 7.85 - 7.84 (m, 1H), 7.79 (t, *J* = 7.2 Hz, 1H), 7.66 - 7.61 (m, 2H), 7.28 - 7.24 (m, 1H), 7.00 (s, 1H), 6.77 (d, *J* = 8.1 Hz, 1H), 6.72 (t, *J* = 7.5 Hz, 1H), 6.33 (s, 1H).

<sup>13</sup>C NMR (100 MHz, DMSO-d<sub>6</sub>)  $\delta$  163.3, 147.7, 147.1, 135.9, 133.9, 133.5, 129.9, 128.9, 127.3, 124.7, 117.7, 114.9, 114.5, 62.2.

LRMS (ESI+): 270.1 (M+H, C<sub>14</sub>H<sub>11</sub>N<sub>3</sub>O<sub>3</sub>, 100%)

Mass 414 mg

m.p. >195°C (decomp)

Yield: 90%

Orange solid

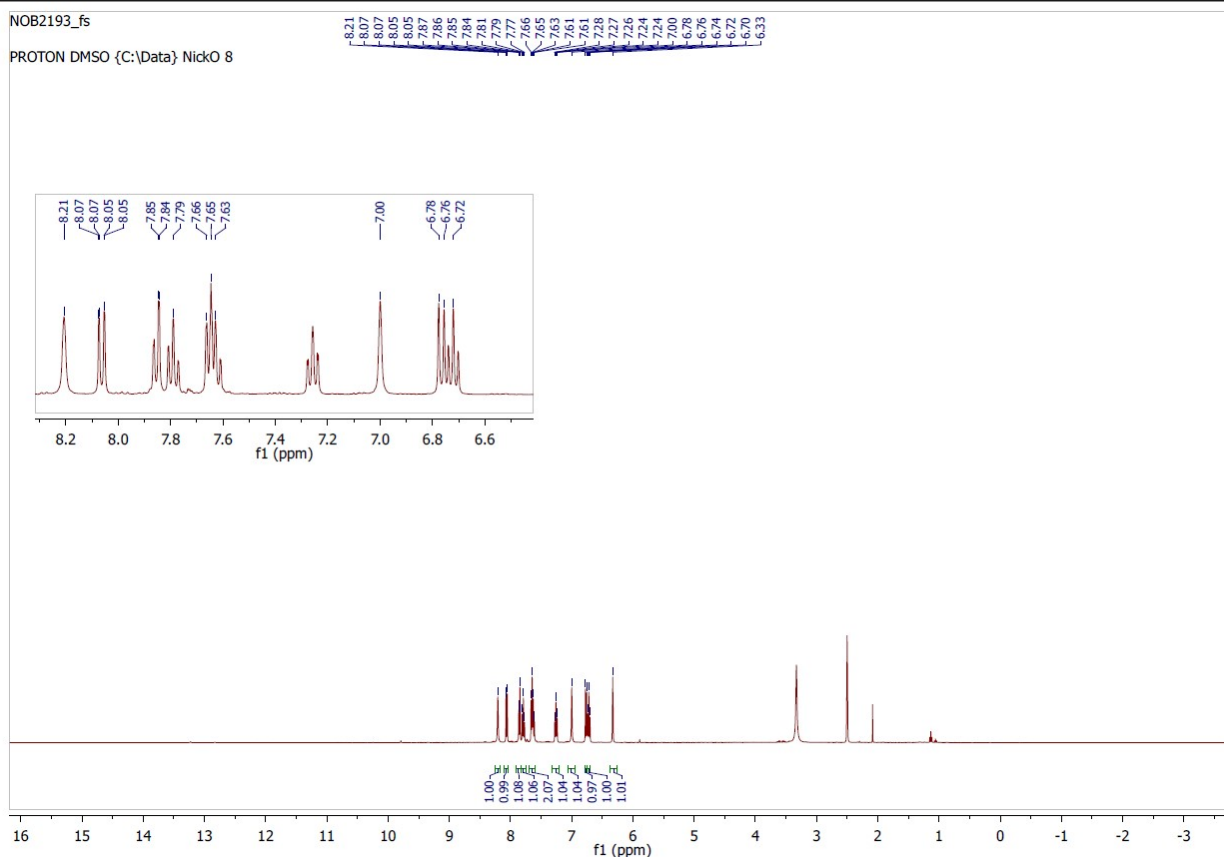

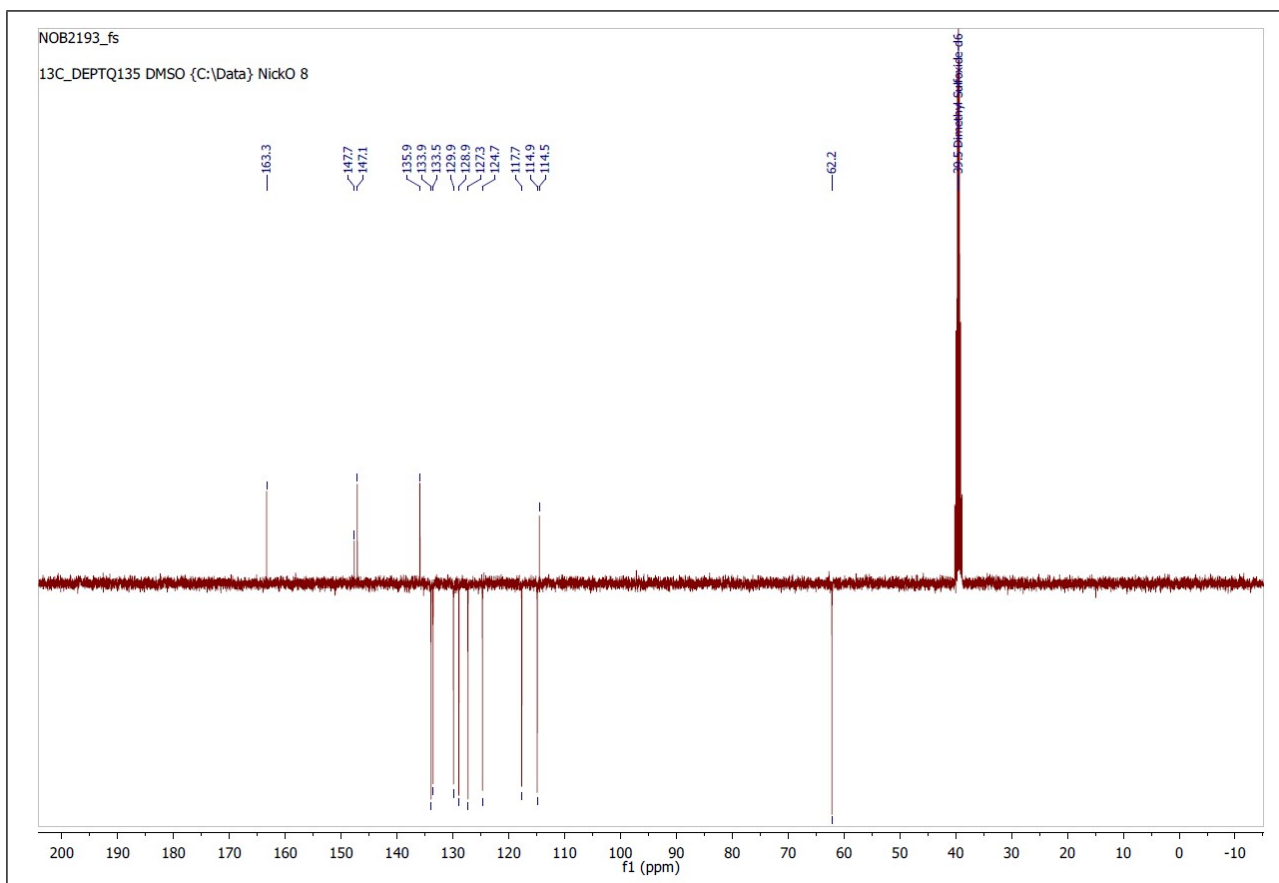

2-(3-nitrophenyl)-2,3-dihydroquinazolin-4(1H)-one (**27**)

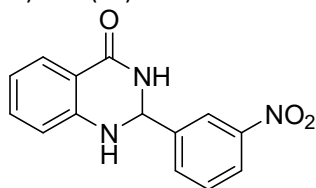

Chemical Formula:  $C_{14}H_{11}N_3O_3$

Exact Mass: 269.08

Molecular Weight: 269.26

**IR** (neat):  $\nu_{\max}$  = 3289 (NH), 3179 (NH), 3072 (CH), 1650 (C=O)  $cm^{-1}$

**$^1H$  NMR** (400 MHz, DMSO- $d_6$ )  $\delta$  8.52 (s, 1H), 8.36 (s, 1H), 8.13 – 8.19 (m, 1H), 7.94 (d,  $J$  = 7.7 Hz, 1H), 7.70 (t,  $J$  = 7.9 Hz, 1H), 7.62 (d,  $J$  = 7.3 Hz, 1H), 7.34 (s, 1H), 7.27 (t, 1H), 6.79 (d,  $J$  = 8.1 Hz, 1H), 6.70 (t,  $J$  = 7.4 Hz, 1H), 5.95 (s, 1H).

**$^{13}C$  NMR** (100 MHz, DMSO- $d_6$ )  $\delta$  163.3, 147.7, 147.3, 144.3, 133.6, 133.4, 130.0, 127.4, 123.3, 121.6, 117.5, 114.9, 114.6, 65.2.

**LRMS** (ESI+): 270.1 (M+H,  $C_{14}H_{11}N_3O_3$ , 100%); LRMS (ESI-): 268.1 (M-H,  $C_{14}H_{11}N_3O_3$ , 100%).

Mass: 356.2 mg

m.p. >194 °C (decomp)

Yield: 78 %

Yellow/orange solid

NOB2192\_fs  
PROTON DMSO {C:\Data} NickO 7

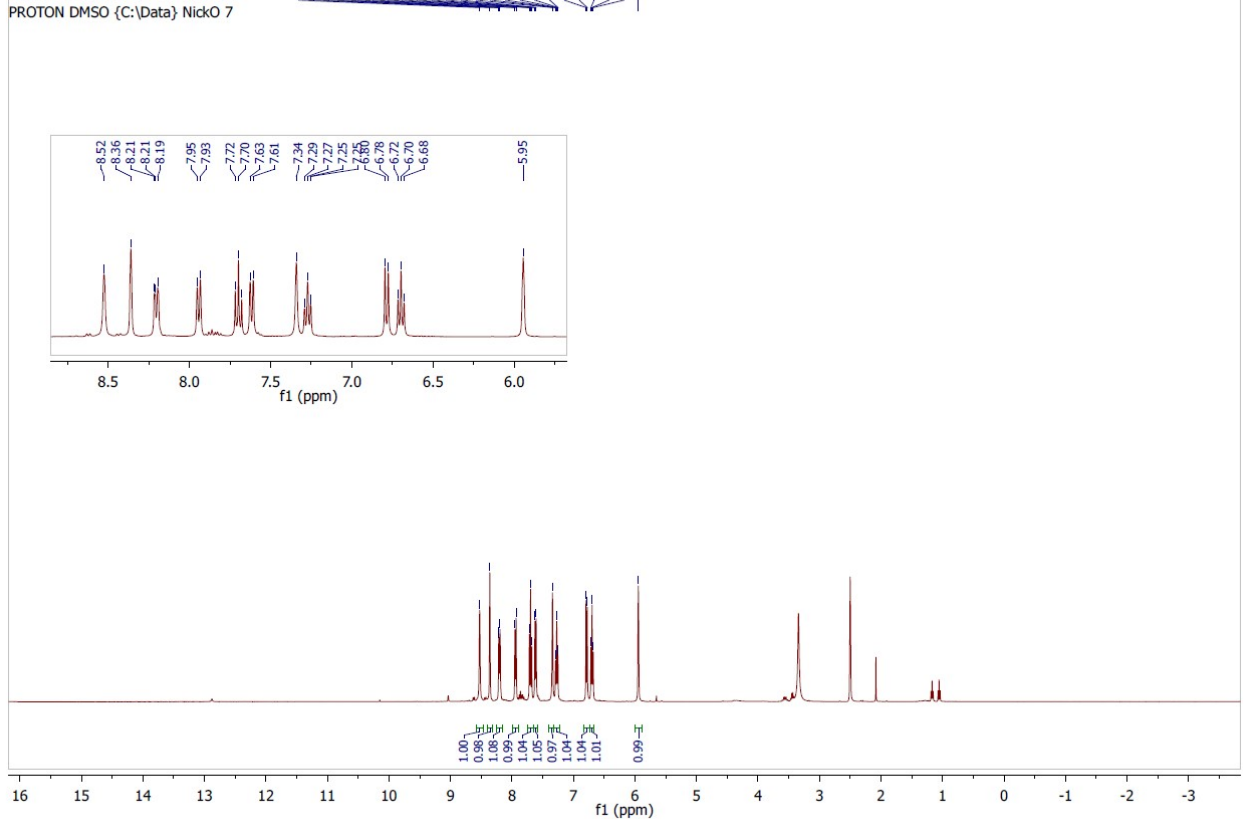

NOB2192\_fs  
13C\_DEPTQ135 DMSO {C:\Data} NickO 7

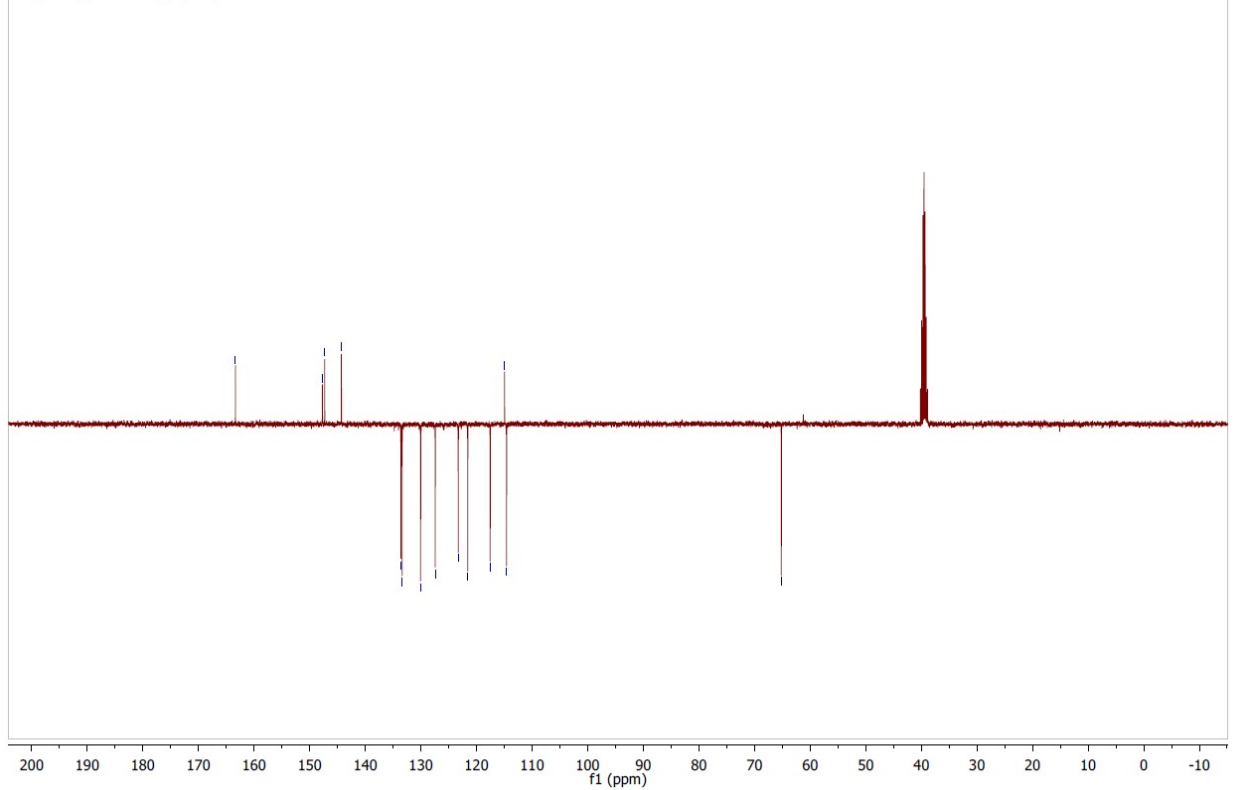



2-(4-nitrophenyl)-2,3-dihydroquinazolin-4(1H)-one (**28**)

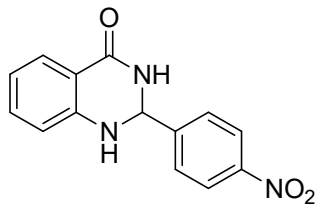

Chemical Formula:  $C_{14}H_{11}N_3O_3$

Exact Mass: 269.08

Molecular Weight: 269.26

IR (neat):  $\nu_{\max}$  = 3279 (NH), 3173 (NH), 3100 (CH), 1644 (C=O)  $cm^{-1}$

$^1H$  NMR (400 MHz, DMSO- $d_6$ )  $\delta$  8.51 (s, 1H), 8.25 (d,  $J$  = 8.8 Hz, 2H), 7.74 (d,  $J$  = 8.7 Hz, 2H), 7.62 – 7.60 (m, 1H), 7.32 (s, 1H), 7.28 – 7.24 (m, 1H), 6.76 (d,  $J$  = 8.0 Hz, 1H), 6.69 (t,  $J$  = 7.4 Hz, 1H), 5.91 (s, 1H).

$^{13}C$  NMR (100 MHz, DMSO- $d_6$ )  $\delta$  163.3, 149.3, 147.2, 133.6, 128.0, 127.4, 123.6, 117.5, 114.9, 114.5, 65.3.

LRMS (ESI+): 270.1 (M+H,  $C_{14}H_{11}N_3O_3$ , 100%); LRMS (ESI-): 268.1 (M-H,  $C_{14}H_{11}N_3O_3$ , 100%).

Mass: 424.6 mg

m.p. >197 °C (decomp)

Yield: 91 %

Yellow solid

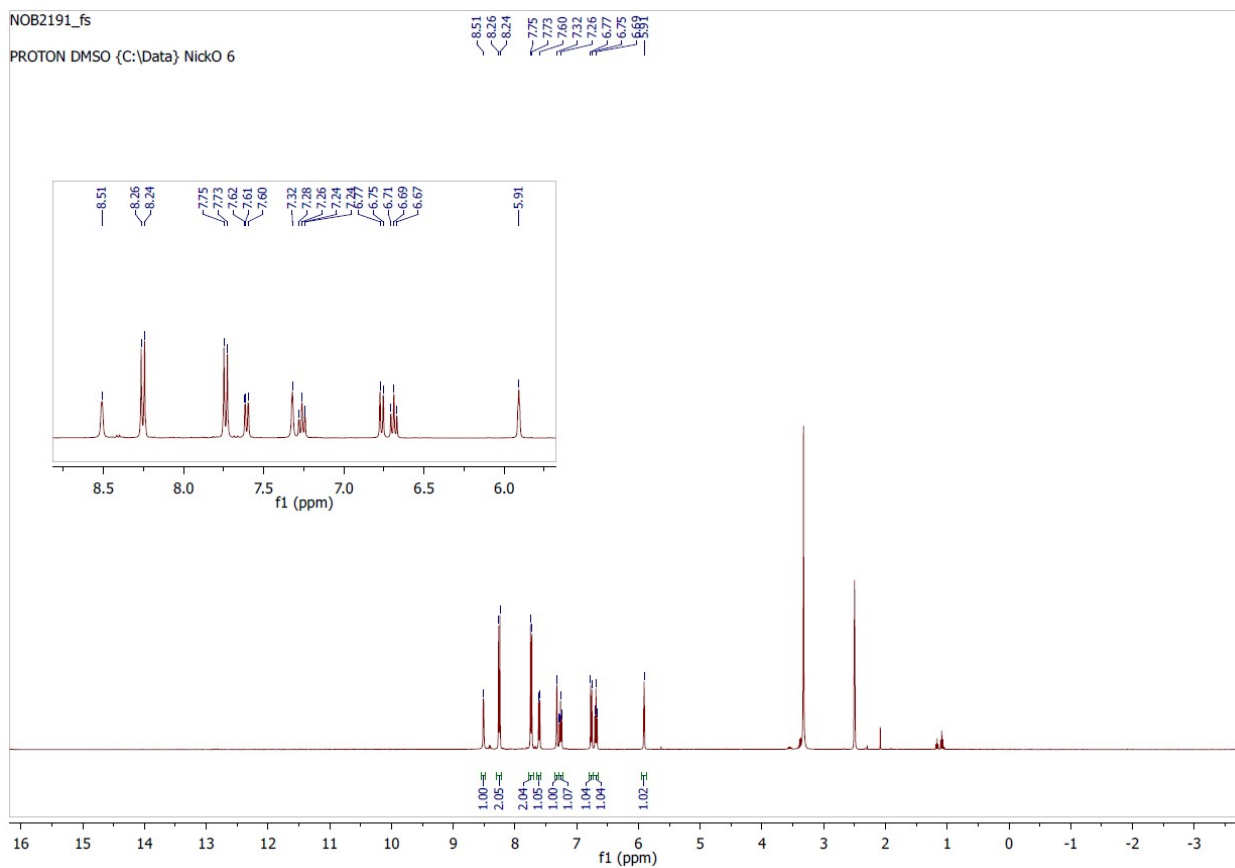

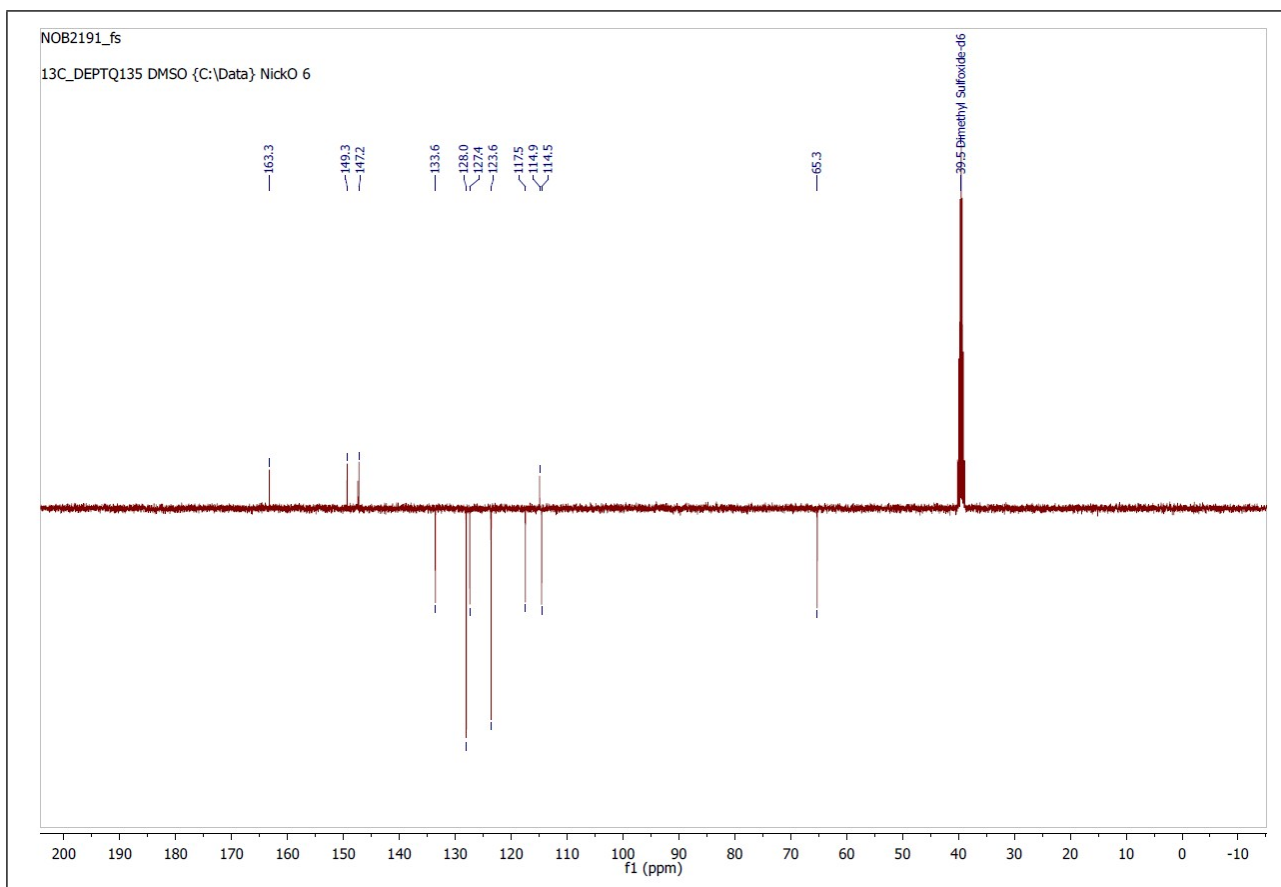

2-(3-methoxyphenyl)-2,3-dihydroquinazolin-4(1H)-one (**29**)

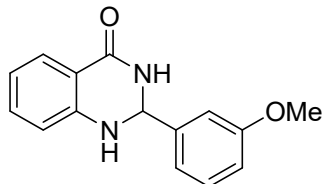

Chemical Formula:  $C_{15}H_{14}N_2O_2$

Exact Mass: 254.11

Molecular Weight: 254.28

IR (neat):  $\nu_{\max}$  = 3288 (NH), 3053 (NH), 2916 (CH), 1645 (C=O)  $cm^{-1}$

$^1H$  NMR (400 MHz, DMSO- $d_6$ )  $\delta$  8.29 (s, 1H), 7.61 (dd,  $J$  = 7.7, 1.5 Hz, 1H), 7.30 (t,  $J$  = 8.1 Hz, 1H), 7.28 – 7.22 (m, 1H), 7.12 (s, 1H), 7.09 – 7.04 (m, 2H), 6.91 (ddd,  $J$  = 8.2, 2.5, 0.8 Hz, 1H), 6.78 – 6.74 (m, 1H), 6.70 – 6.64 (m, 1H), 5.72 (s, 1H), 3.75 (s, 3H).

$^{13}C$  NMR (100 MHz, DMSO- $d_6$ )  $\delta$  164.0, 159.7, 148.3, 143.8, 133.8, 129.9, 127.8, 119.4, 117.6, 115.4, 114.90, 114.1, 113.0, 66.5, 55.6.

LRMS (ESI+): 255.1 (M+H,  $C_{15}H_{15}N_2O_2$ , 100%); LRMS (ESI-): 253.1 (M-H,  $C_{15}H_{13}N_2O_2$ , 100%).

Mass: 71.6 mg

m.p. 139.7 – 146.5 °C

yield: 18 %

colour: off white solid

NOB3034

PROTON DMSO {C:\Data} NickO 40

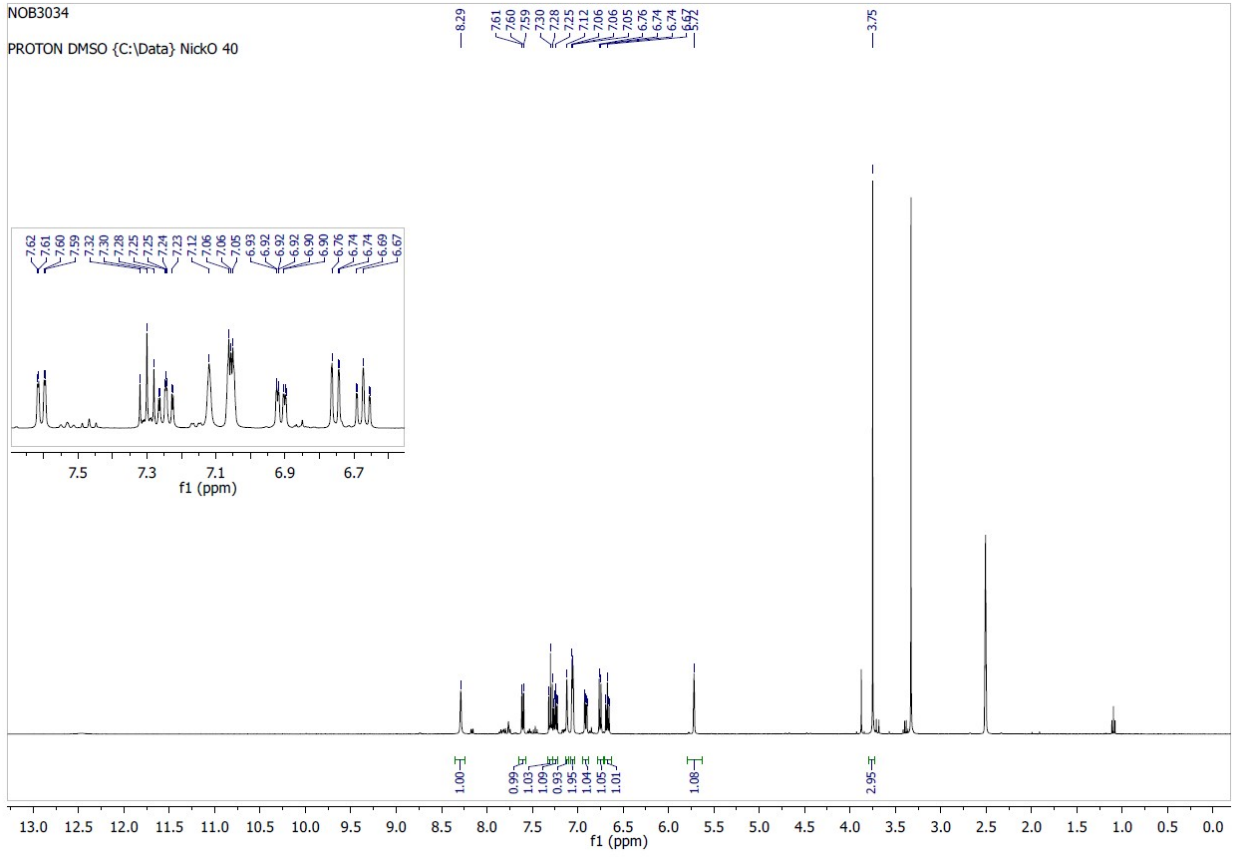

NOB3034

13C\_DEPTQ135 DMSO {C:\Data} NickO 40

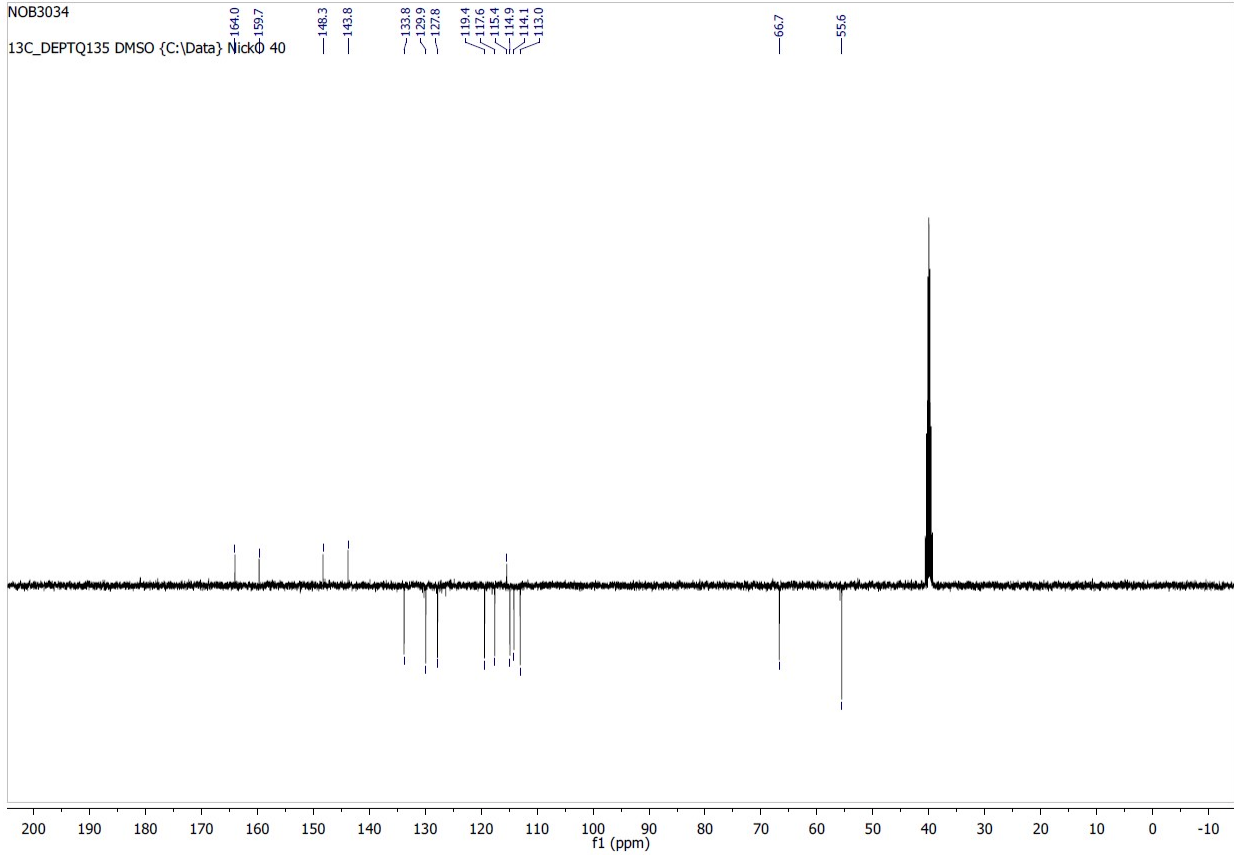

2-(3-(trifluoromethyl)phenyl)-2,3-dihydroquinazolin-4(1H)-one (**30**)

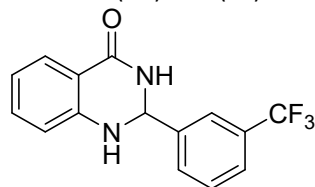

Chemical Formula: C<sub>15</sub>H<sub>11</sub>F<sub>3</sub>N<sub>2</sub>O

Exact Mass: 292.08

Molecular Weight: 292.26

IR (neat):  $\nu_{\max}$  = 3275 (NH), 3211 (NH), 1645 (C=O) cm<sup>-1</sup>

<sup>1</sup>H NMR (400 MHz, DMSO-d<sub>6</sub>)  $\delta$  8.42 (s, 1H), 7.85 (s, 1H), 7.80 (d, *J* = 7.7 Hz, 1H), 7.72 (d, *J* = 7.8 Hz, 1H), 7.64 – 7.610 (m, 2H), 7.29 – 7.23 (m, 2H), 6.78 – 6.76 (m, 1H), 6.72 – 6.68 (m, 1H), 5.89 (s, 1H).

<sup>13</sup>C NMR (100 MHz, DMSO-d<sub>6</sub>)  $\delta$  163.5, 147.6, 143.1, 133.5, 131.0, 129.5, 127.4, 125.20, 125.16, 123.64, 123.60, 117.4, 114.9, 114.5, 65.7.

LRMS (ESI+): 293.1 (M+H, C<sub>15</sub>H<sub>12</sub>F<sub>3</sub>N<sub>2</sub>O, 100%); LRMS (ESI-): 291.1 (M-H, C<sub>15</sub>H<sub>10</sub>F<sub>3</sub>N<sub>2</sub>O, 100%).

Mass: 138.3

m.p. 137 – 141 °C

yield: 29 %

colour white solid

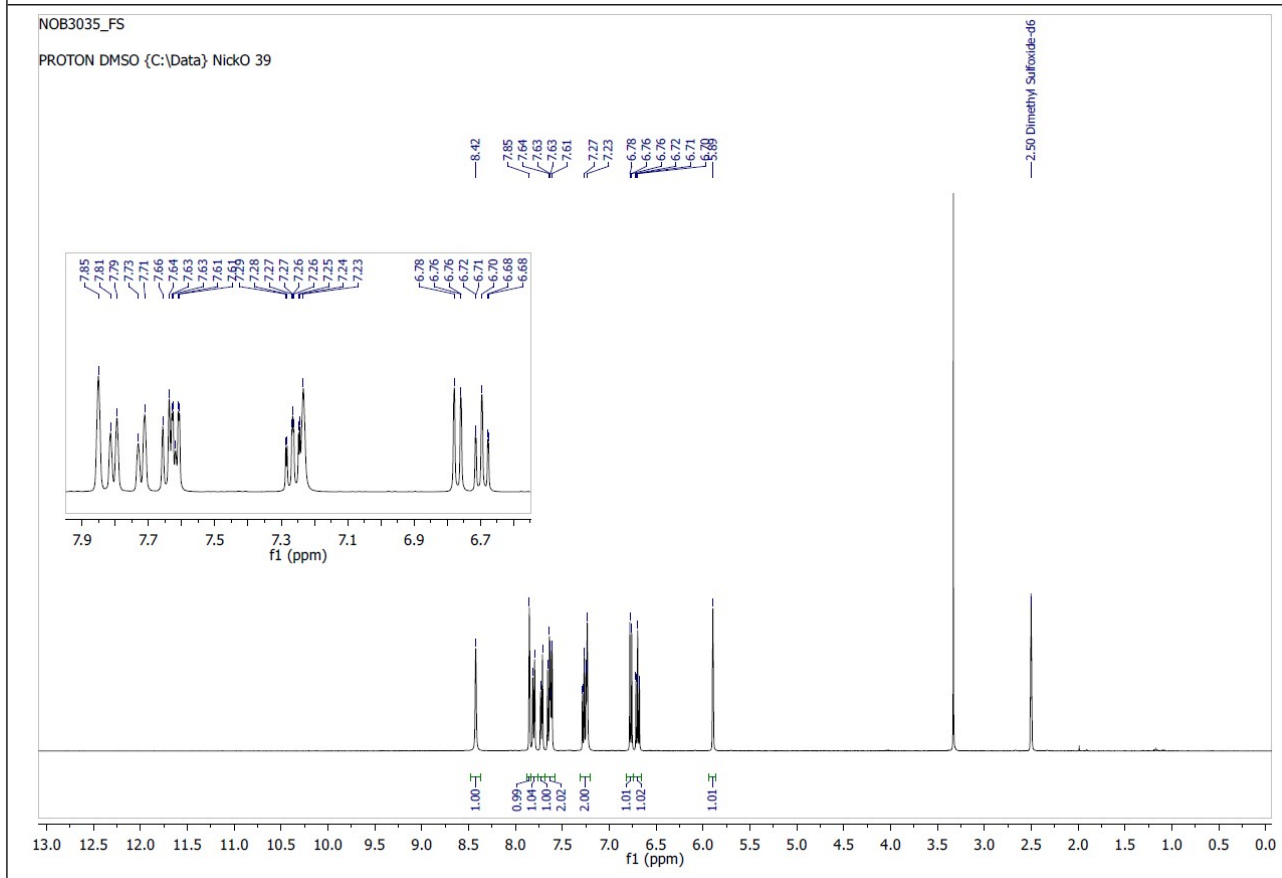

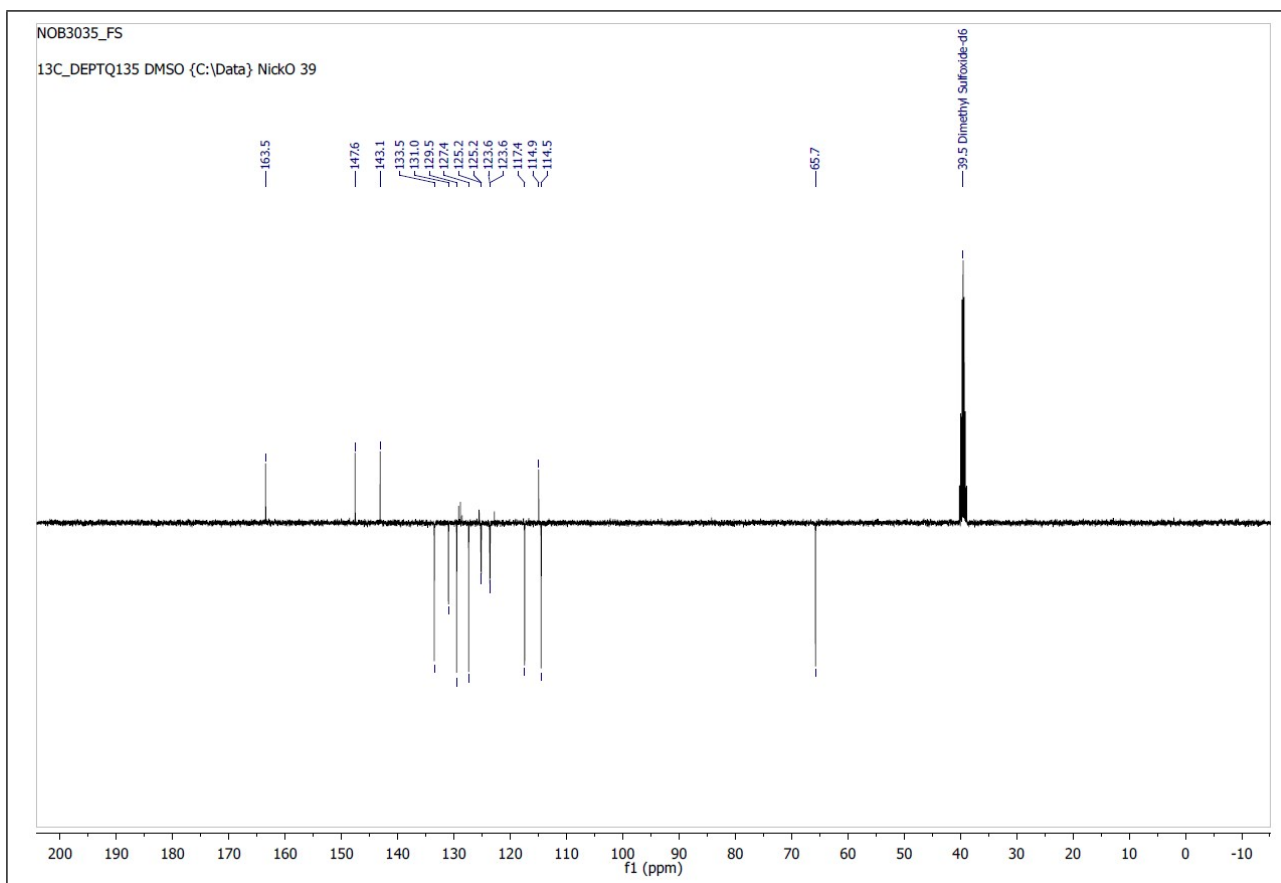

2-(3-Cyanophenyl)-2,3-dihydroquinazolin-4(1H)-one (**31**)

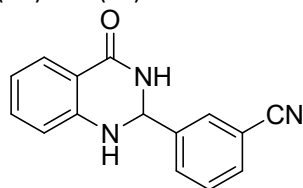

Chemical Formula: C<sub>15</sub>H<sub>11</sub>N<sub>3</sub>O

Exact Mass: 249.09

Molecular Weight: 249.27

**IR** (neat):  $\nu_{\max}$  = 3372 (NH), 3178 (NH), 2232 (CN), 1659 (C=O) cm<sup>-1</sup>

**<sup>1</sup>H NMR** (400 MHz, DMSO)  $\delta$  8.42 (s, 1H), 7.91 (s, 1H), 7.85 – 7.82 (m, 2H), 7.62 (ddd,  $J$  = 7.8, 4.6, 3.3 Hz, 2H), 7.33 – 7.20 (m, 2H), 6.77 (d,  $J$  = 8.0 Hz, 1H), 6.73 – 6.68 (m, 1H), 5.85 (s, 1H).

**<sup>13</sup>C NMR** (100 MHz, DMSO)  $\delta$  163.4, 147.5, 143.3, 133.5, 132.2, 131.7, 130.6, 129.7, 127.4, 118.7, 117.5, 115.0, 114.6, 111.2, 65.5.

**LRMS** (ESI<sup>+</sup>): 250.1 (M+H, C<sub>15</sub>H<sub>12</sub>N<sub>3</sub>O, 100%); LRMS (ESI<sup>-</sup>): 248.1 (M-H, C<sub>15</sub>H<sub>10</sub>N<sub>3</sub>O, 100%).

Mass 308.2 mg

m.p. 224 – 230 °C

yield: 72 %

colour white solid

NOB4040\_FS

PROTON DMSO {C:\Data} NickO 12

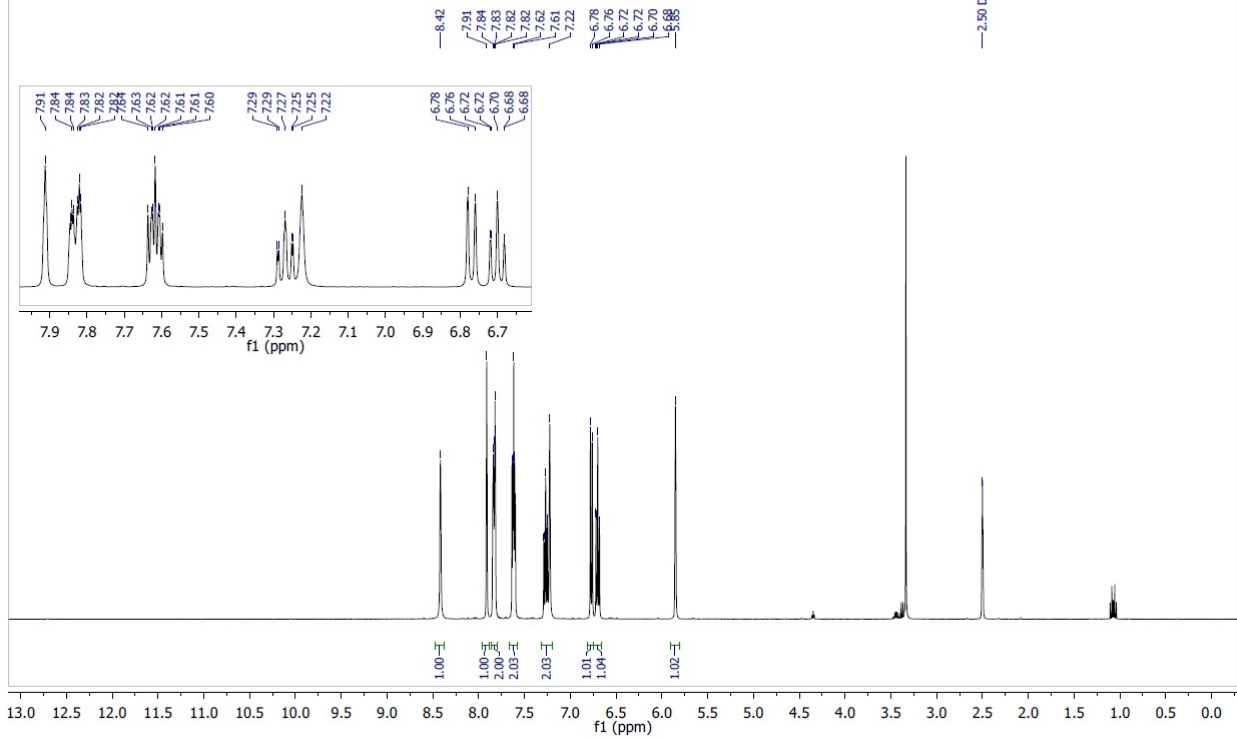

NOB4040\_FS

13C\_DEPTQ135 DMSO {C:\Data} NickO 12

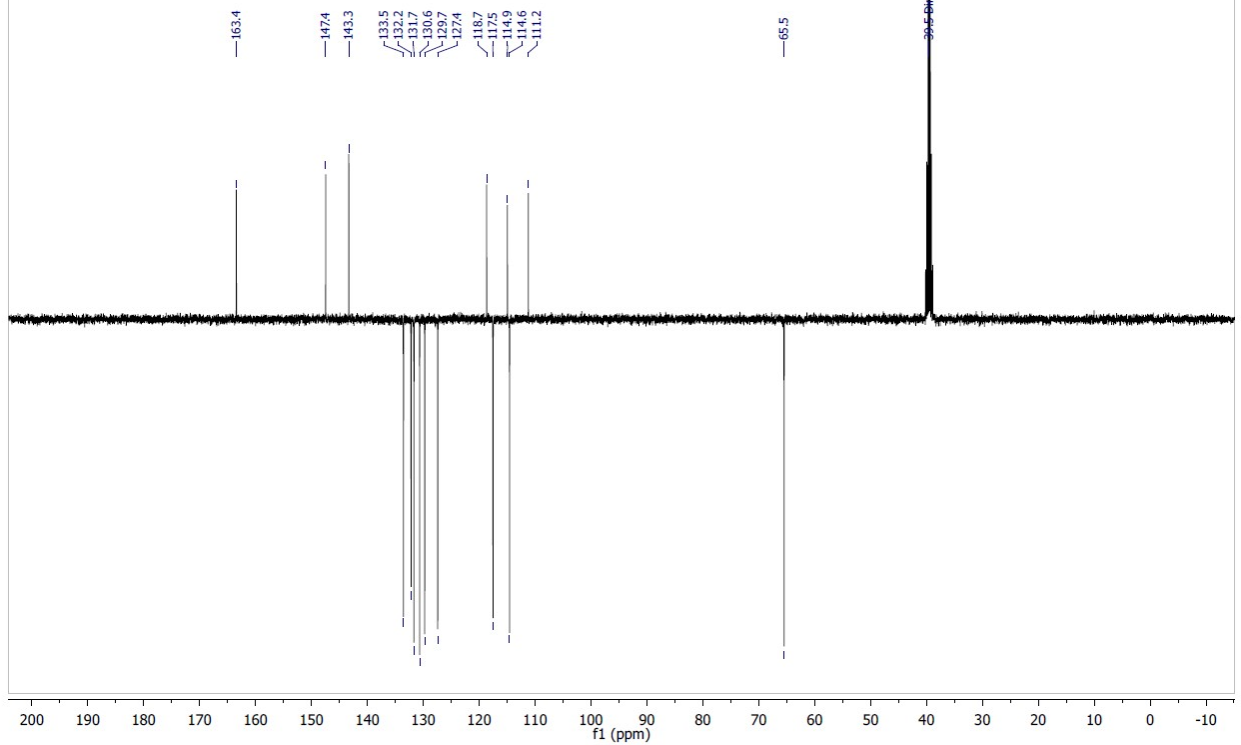

4-(4-oxo-1,2,3,4-tetrahydroquinazolin-2-yl)benzotrile (32)

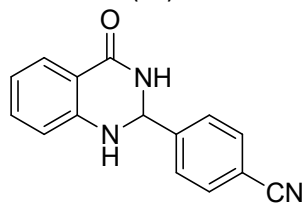

Chemical Formula: C<sub>15</sub>H<sub>11</sub>N<sub>3</sub>O

Exact Mass: 249.09

Molecular Weight: 249.27

IR (neat):  $\nu_{\max}$  = 3346 (NH), 2227 (CN), 1664 (C=O) cm<sup>-1</sup>

<sup>1</sup>H NMR (400 MHz, DMSO-d<sub>6</sub>)  $\delta$  8.47 (s, 1H), 7.90 – 7.84 (m, 2H), 7.66 (d, *J* = 8.2 Hz, 2H), 7.61 (dd, *J* = 7.7, 1.4 Hz, 1H), 7.31 – 7.22 (m, 2H), 6.76 (d, *J* = 8.1 Hz, 1H), 6.71 – 6.65 (m, 1H), 5.85 (s, 1H).

<sup>13</sup>C NMR (100 MHz, DMSO-d<sub>6</sub>)  $\delta$  163.8, 147.81, 147.79, 134.0, 132.9, 128.1, 127.9, 119.1, 117.9, 115.4, 115.0, 111.5, 66.0.

LRMS (ESI+): 250.1 (M+H, C<sub>15</sub>H<sub>12</sub>N<sub>3</sub>O, 100%); LRMS (ESI-): 248.1 (M-H, C<sub>15</sub>H<sub>10</sub>N<sub>3</sub>O, 100%).

Mass 346.7 mg

m.p. 240 – 247 °C

yield 86 %

colour white solid

NOB4039\_FS

PROTON DMSO {C:\Data} NickO 11

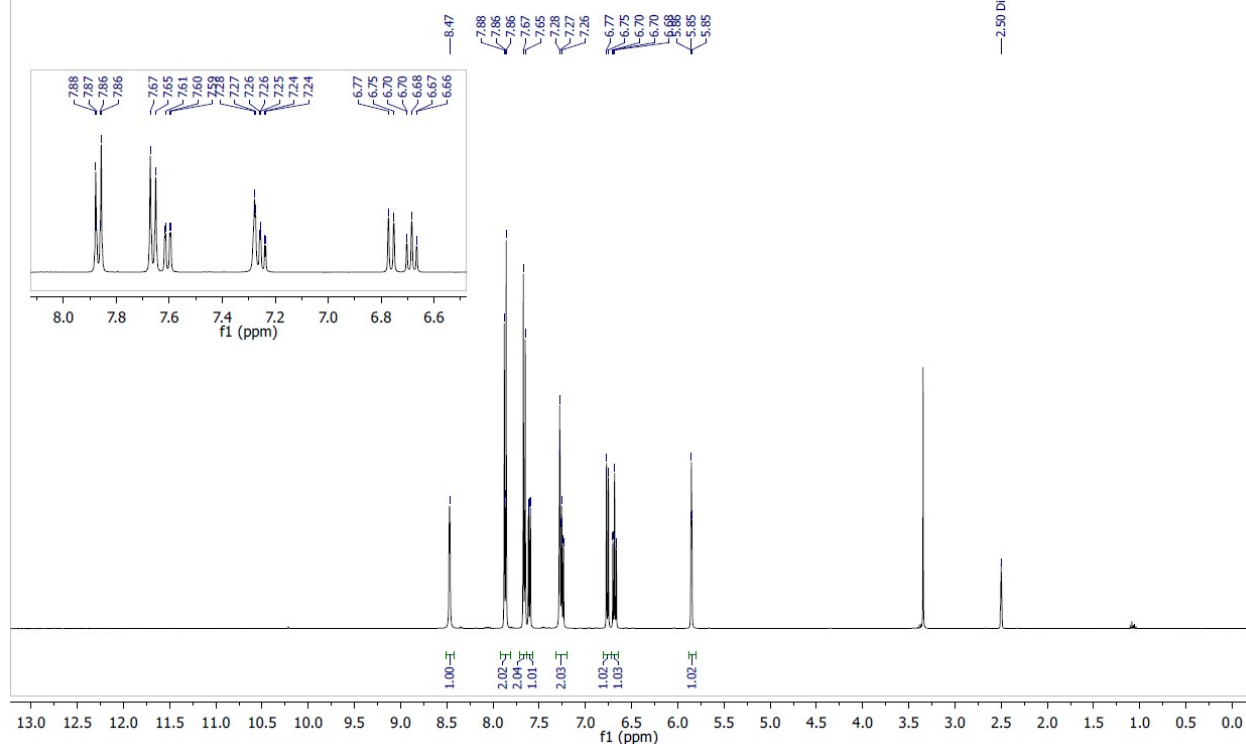

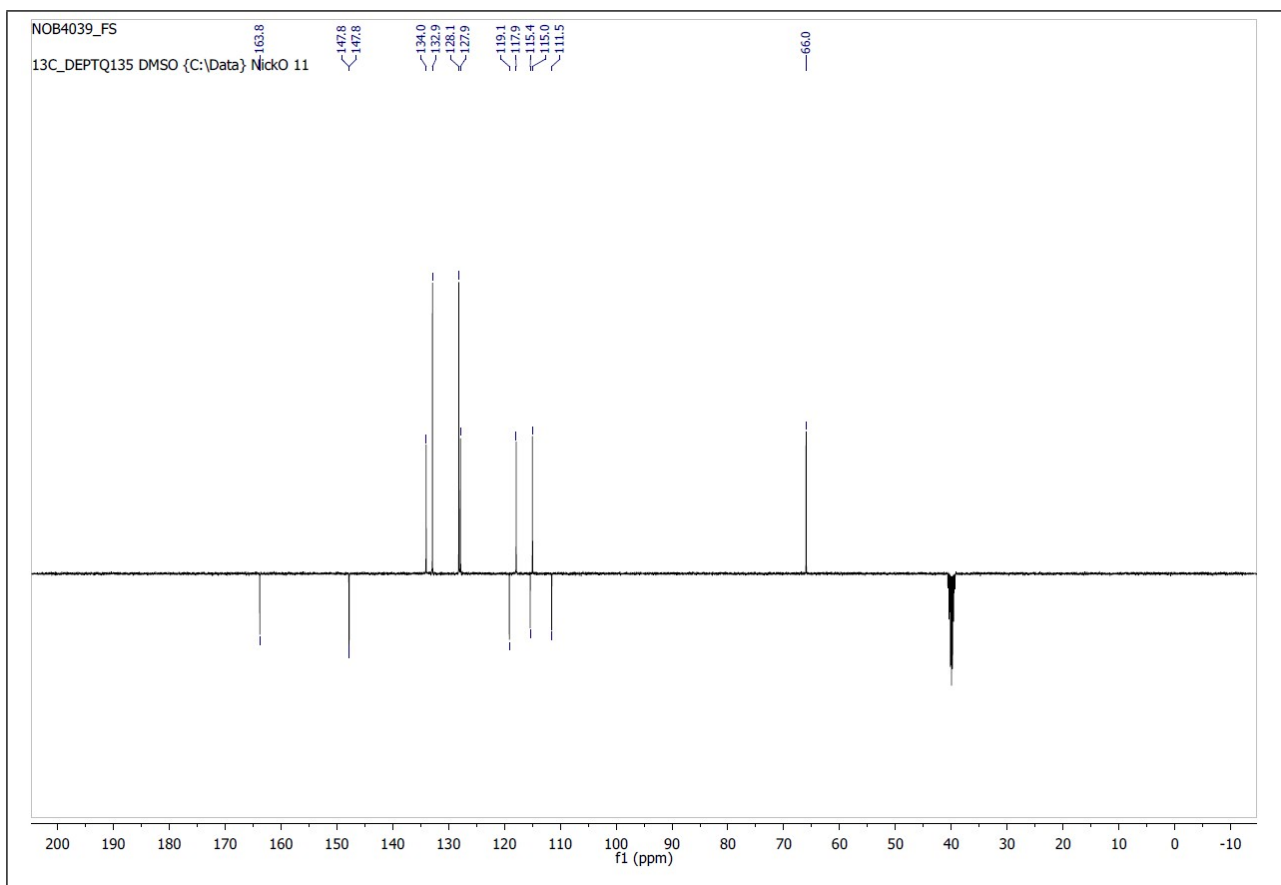

2-(3,4,5-trihydroxyphenyl)-2,3-dihydroquinazolin-4(1H)-one (**33**)

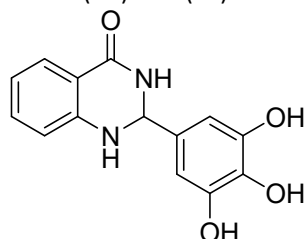

Chemical Formula:  $C_{14}H_{12}N_2O_4$

Exact Mass: 272.08

Molecular Weight: 272.26

**IR** (neat):  $\nu_{\max}$  = 3448 (NH), 3308 (OH), 1639 (C=O)  $cm^{-1}$

**$^1H$  NMR** (400 MHz, DMSO- $d_6$ )  $\delta$  8.93 (s, 2H), 8.02 (d,  $J$  = 1.8 Hz, 1H), 7.60 (dd,  $J$  = 7.8, 1.4 Hz, 1H), 7.22 (ddd,  $J$  = 8.2, 7.2, 1.6 Hz, 1H), 6.75 – 6.69 (m, 1H), 6.69 – 6.60 (m, 1H), 6.41 (s, 2H), 5.47 (d,  $J$  = 1.9 Hz, 1H).

**$^{13}C$  NMR** (100 MHz, DMSO- $d_6$ )  $\delta$  164.1, 148.4, 146.2 (2C), 133.7, 132.1, 127.8, 117.3, 115.2, 114.7, 106.2 (2C), 67.2.

**LRMS** (ESI+): 273.1 (M+H,  $C_{14}H_{13}N_2O_4$ , 70%); (ESI-): 271.1 (M-H,  $C_{14}H_{12}N_2O_4$ , 100%), 269.1 (M-2H,  $C_{14}H_{11}N_2O_4$ , 70%)

Mass: 193.3 mg

m.p. >164 °C

Yield: 40 %

Amorphous Red solid



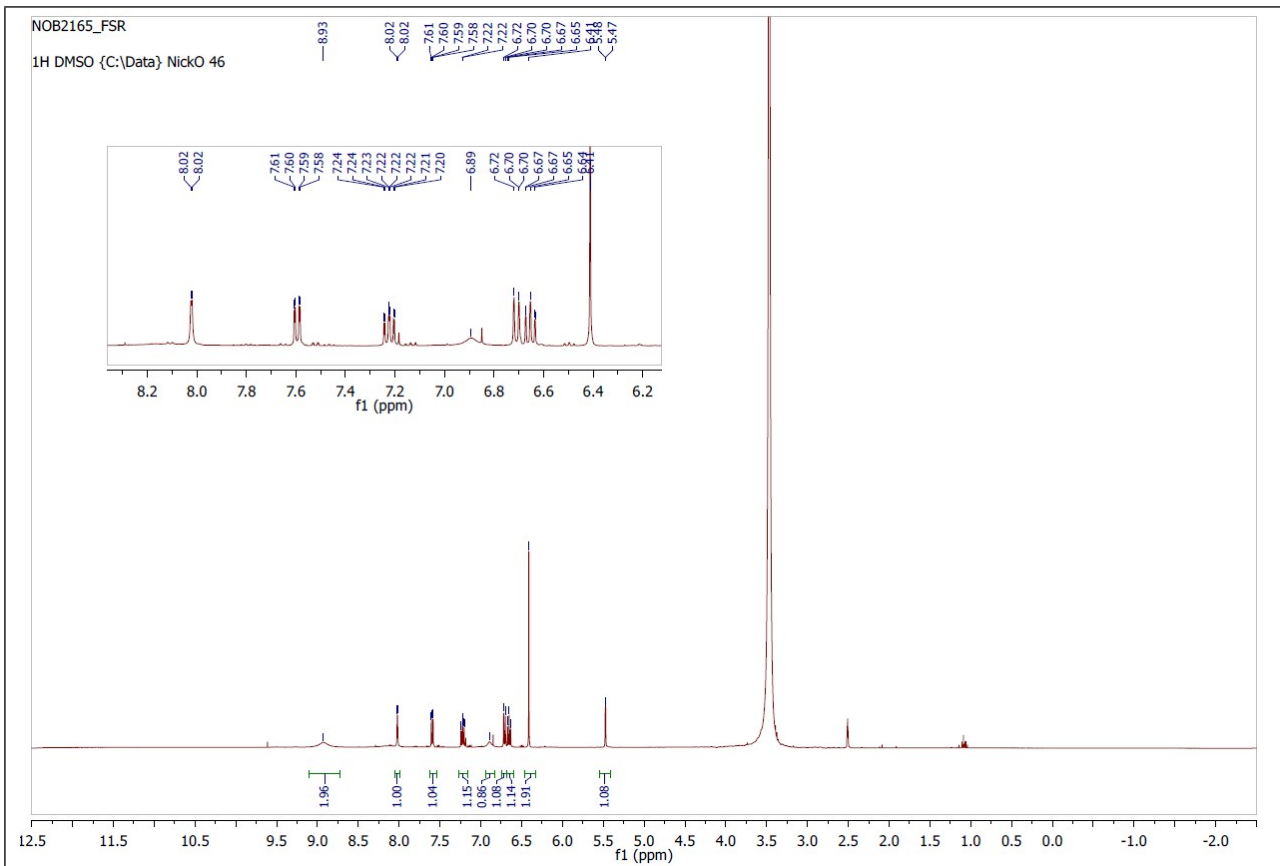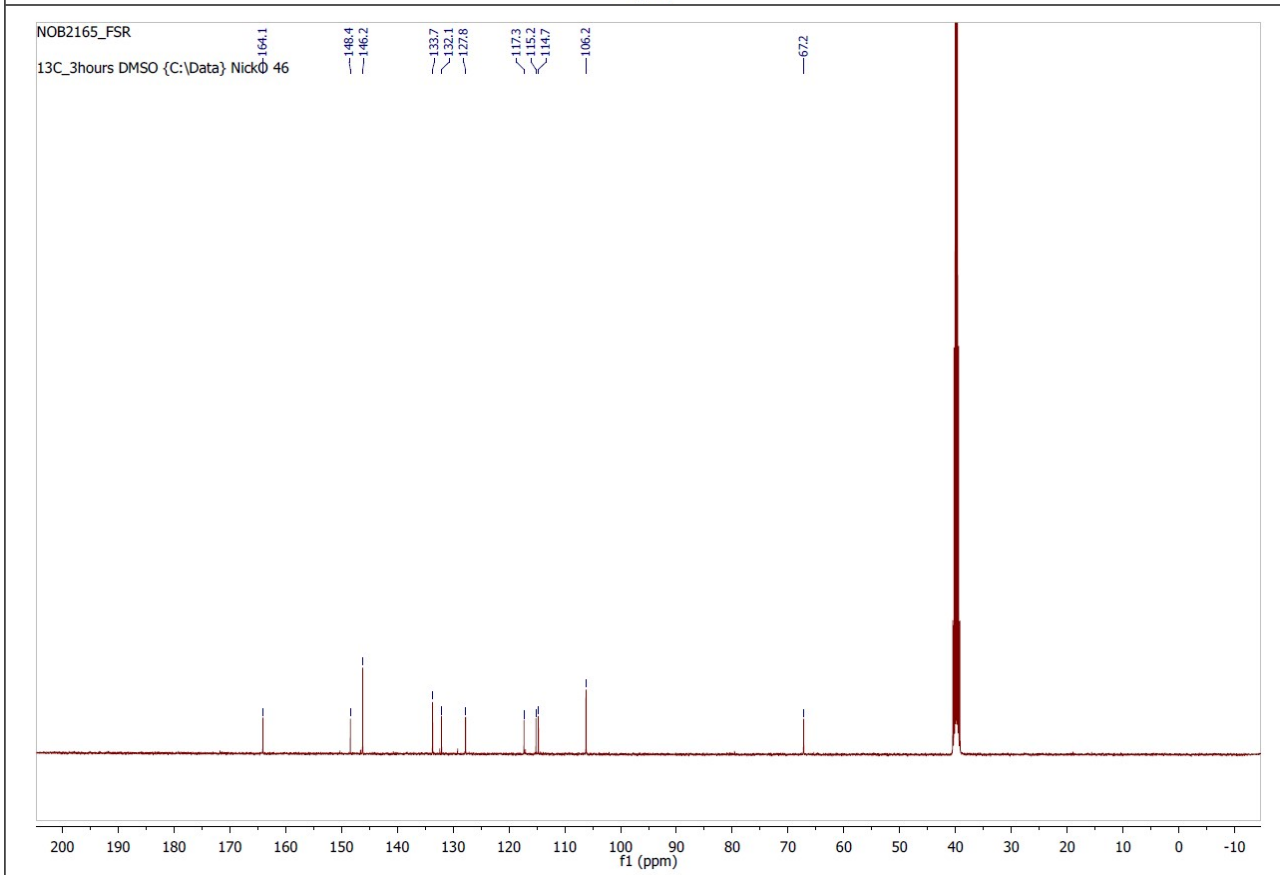

2-(pyridin-3-yl)-2,3-dihydroquinazolin-4(1H)-one (**34**)

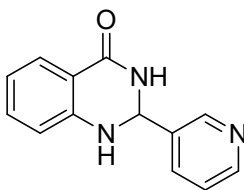

Chemical Formula: C<sub>13</sub>H<sub>11</sub>N<sub>3</sub>O

Exact Mass: 225.09

Molecular Weight: 225.25

IR (neat):  $\nu_{\max}$  = 3256 (NH), 2978 (CH), 1652 (C=O)

<sup>1</sup>H NMR (400 MHz, DMSO-d<sub>6</sub>)  $\delta$  8.67 (d,  $J$  = 2.1 Hz, 1H), 8.56 (dd,  $J$  = 4.8, 1.6 Hz, 1H), 8.38 (s, 1H), 7.90 (dt,  $J$  = 7.9, 1.9 Hz, 1H), 7.63 (dd,  $J$  = 7.7, 1.5 Hz, 1H), 7.43 (ddd,  $J$  = 7.9, 4.8, 0.5 Hz, 1H), 7.27 (ddd,  $J$  = 8.2, 7.3, 1.6 Hz, 1H), 7.17 (s, 1H), 6.73 (ddd,  $J$  = 15.0, 8.1, 4.3 Hz, 2H), 5.86 (s, 1H).

<sup>13</sup>C NMR (100 MHz, DMSO-d<sub>6</sub>) 164.0, 150.1, 148.8, 148.2, 137.3, 135.1, 133.9, 127.9, 124.0, 118.0, 115.5, 115.0, 65.1.

LRMS (ESI+) 226.1 (C<sub>13</sub>H<sub>12</sub>N<sub>3</sub>O, 100%); LRMS (ESI-) 224.1 (C<sub>13</sub>H<sub>10</sub>N<sub>3</sub>O, 100%).

Mass: 298 mg

m.p. >250 °C

Yield: 84 %

Pale orange solid

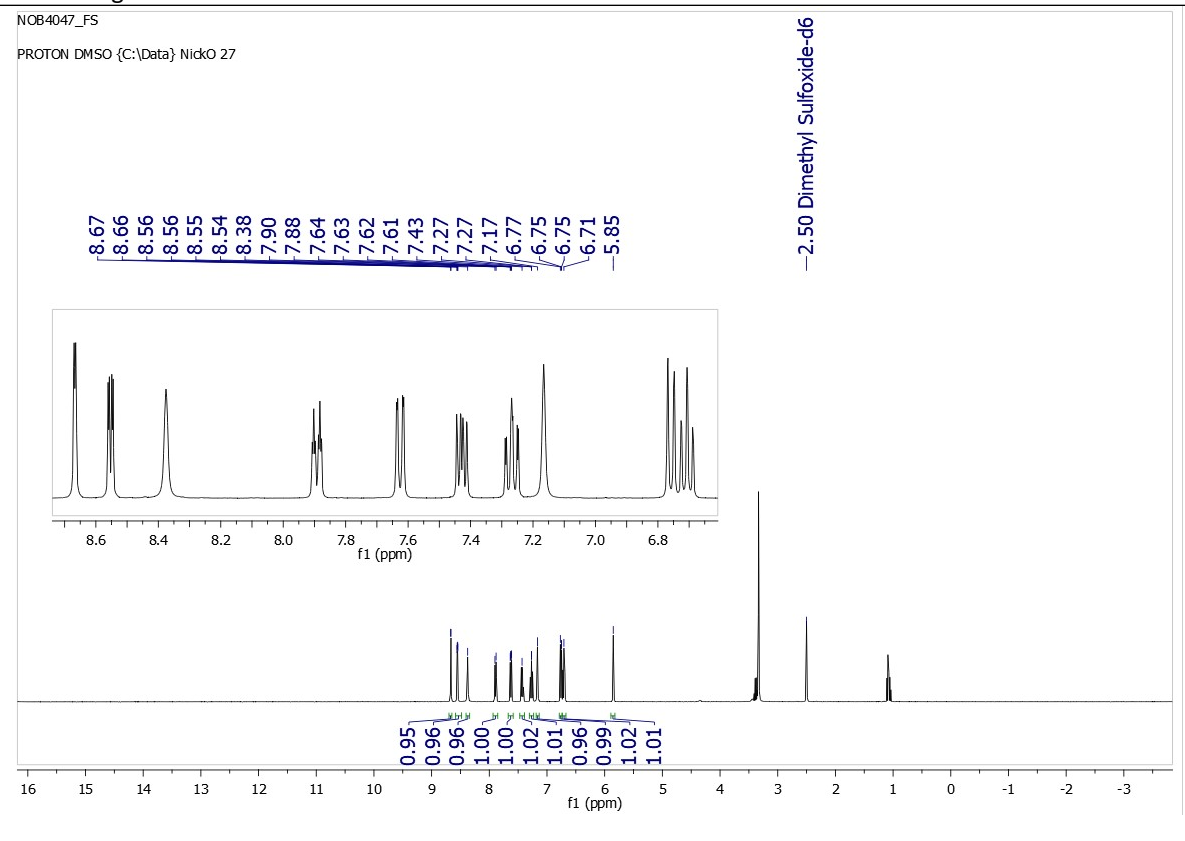

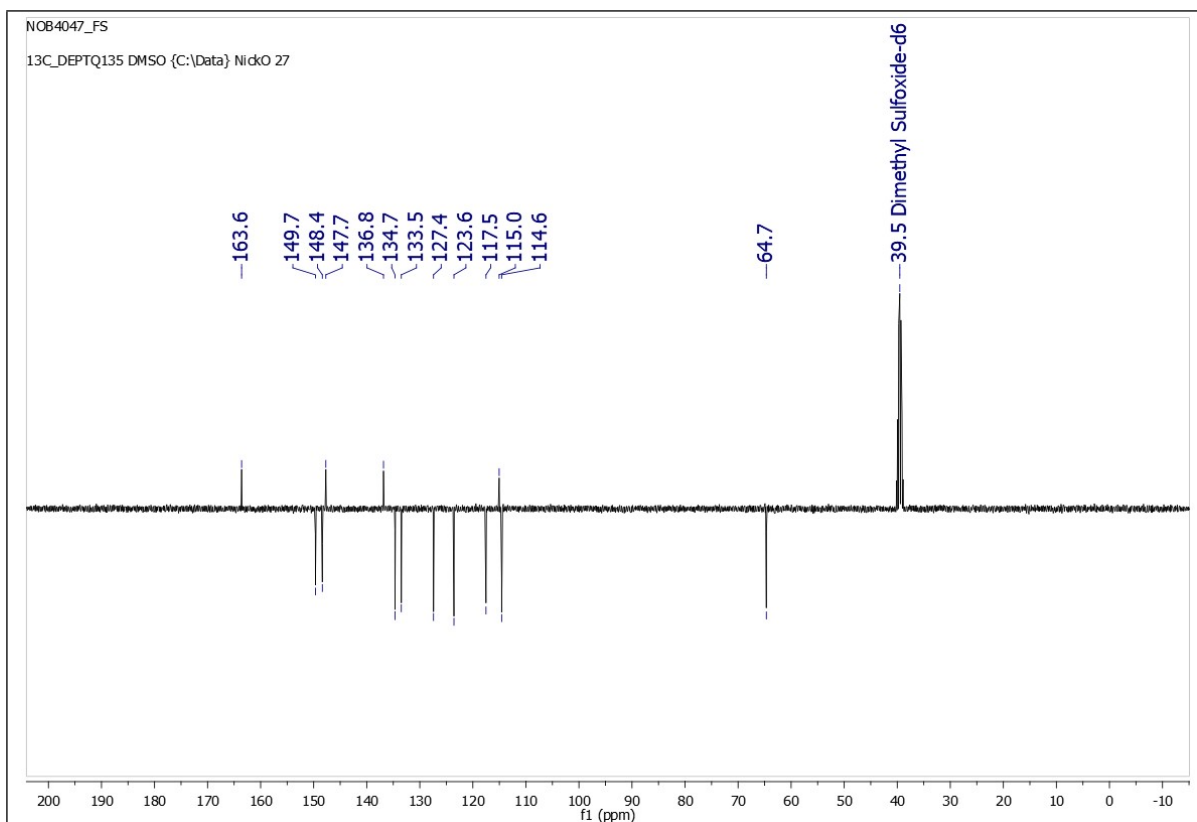

2-(thiophen-2-yl)-2,3-dihydroquinazolin-4(1H)-one (**35**)

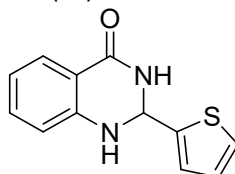

Chemical Formula: C<sub>12</sub>H<sub>10</sub>N<sub>2</sub>OS

Exact Mass: 230.05

Molecular Weight: 230.29

**IR** (neat):  $\nu_{\max}$  = 3295 (NH), 3172 (NH), 1649 (C=O) cm<sup>-1</sup>

**<sup>1</sup>H NMR** (400 MHz, DMSO-d<sub>6</sub>)  $\delta$  8.44 (s, 1H), 7.62 (dd,  $J$  = 7.7, 1.3 Hz, 1H), 7.45 (dd,  $J$  = 5.0, 1.2 Hz, 1H), 7.26 – 7.24 (m, 2H), 7.12 (d,  $J$  = 3.0 Hz, 1H), 6.98 (dd,  $J$  = 5.0, 3.5 Hz, 1H), 6.76 (d,  $J$  = 7.8 Hz, 1H), 6.70 (t, 1H), 6.02 (s, 1H).

**<sup>13</sup>C NMR** (100 MHz, DMSO-d<sub>6</sub>)  $\delta$  163.1, 147.2, 146.4, 133.4, 127.3, 126.5, 125.9, 125.7, 117.5, 115.1, 114.7, 62.6.

**LRMS** (ESI<sup>+</sup>): 231.1 (M+H, C<sub>12</sub>H<sub>11</sub>N<sub>2</sub>OS, 100%); **LRMS** (ESI<sup>-</sup>): 229.1 (M-H, C<sub>12</sub>H<sub>11</sub>N<sub>2</sub>OS, 100%).

Mass 309.3

m.p. 206 – 207 °C

yield 80 %

colour white solid

NOB4045\_FS

PROTON DMSO {C:\Data} NickO 25

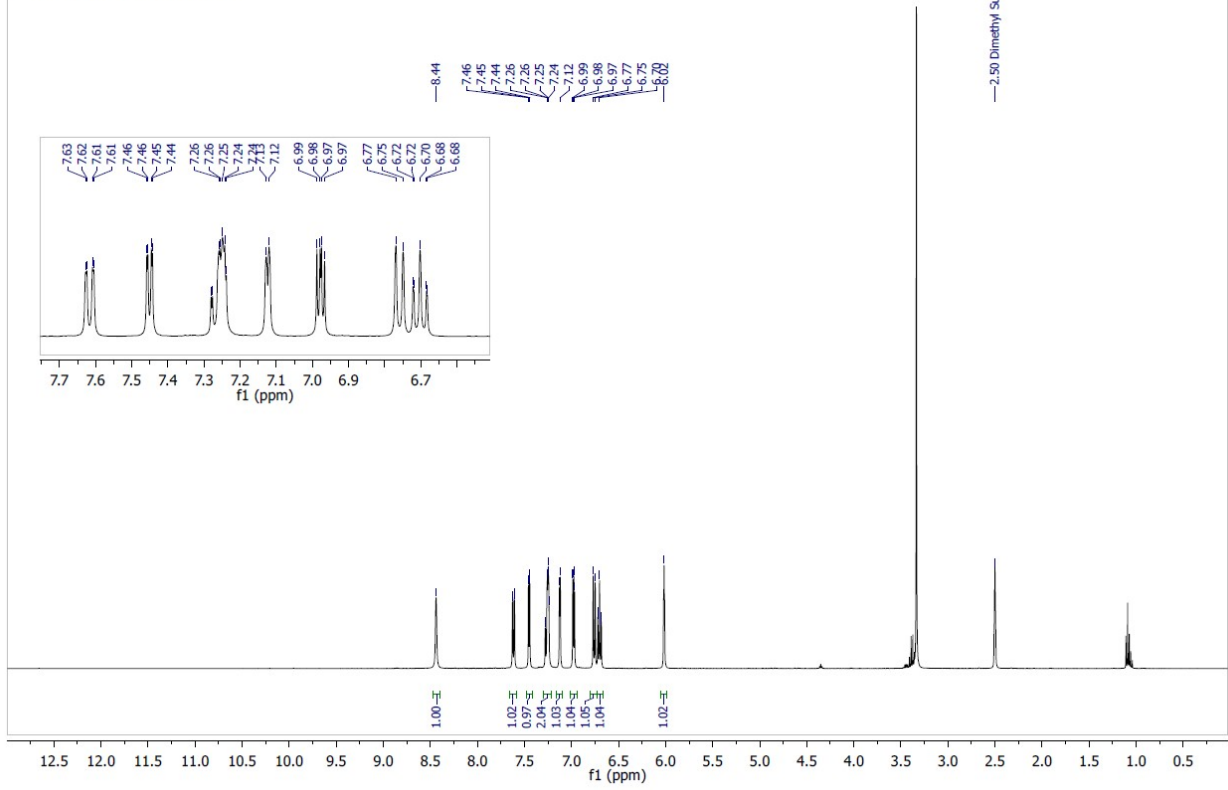

NOB4045\_FS

13C\_DEPTQ135 DMSO {C:\Data} NickO 25

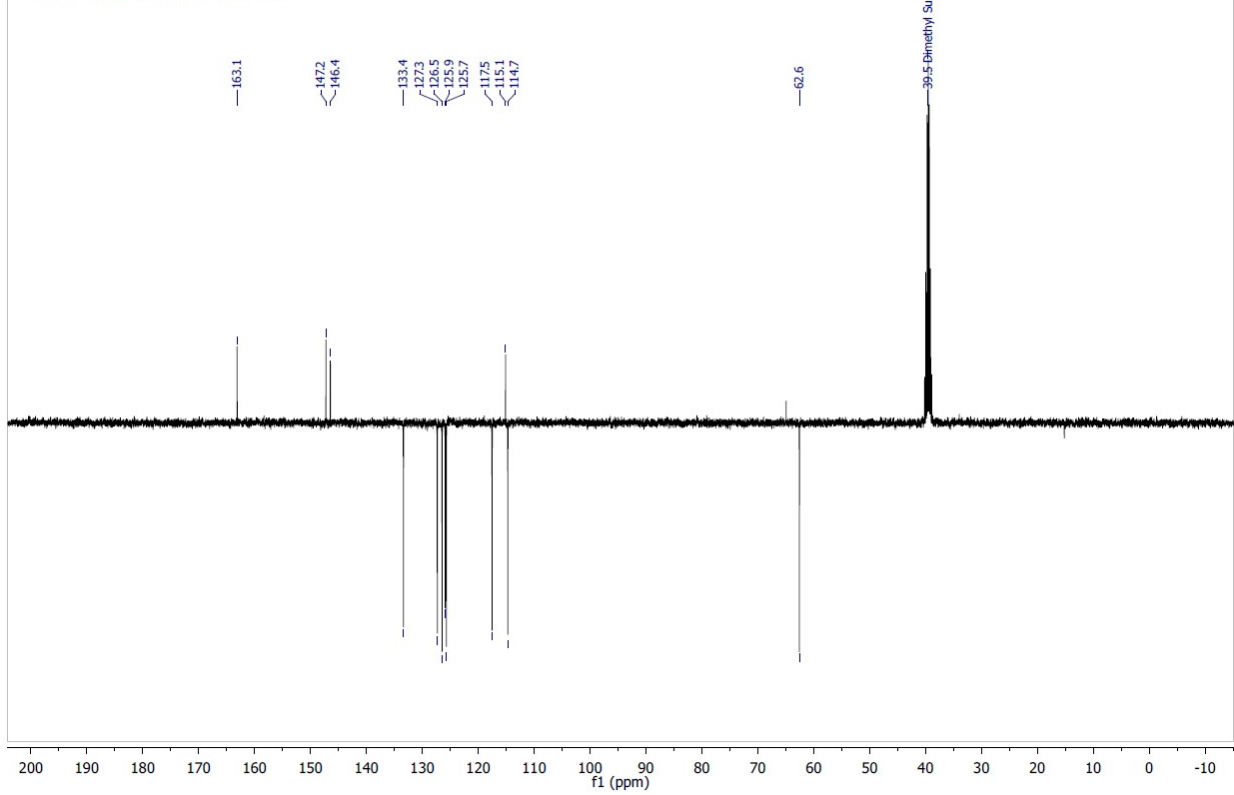

2-(5-bromofuran-2-yl)-2,3-dihydroquinazolin-4(1H)-one (36)

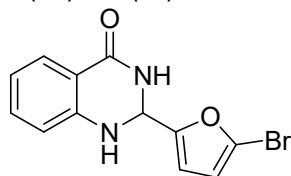

Chemical Formula:  $C_{12}H_9BrN_2O_2$

Exact Mass: 291.98

Molecular Weight: 293.12

IR neat):  $\nu_{\max}$  = 3270 (NH), 3165 (NH), 1651 (C=O)  $cm^{-1}$

$^1H$  NMR (400 MHz, DMSO- $d_6$ )  $\delta$  8.44 (s, 1H), 7.61 (s, 1H), 7.27 (s, 2H), 6.73 (d,  $J$  = 30.9 Hz, 2H), 6.56 – 6.21 (m, 2H), 5.75 (s, 1H).

$^{13}C$  NMR (100 MHz, DMSO- $d_6$ )  $\delta$  163.1, 156.6, 146.9, 133.4, 127.3, 121.0, 117.5, 114.9, 114.6, 112.3, 110.2, 60.0.

LRMS (ESI+): 293.1 (M+H,  $C_{12}H_{10}^{79}BrN_2O_2$ , 100%), 295.1 (M+H,  $C_{12}H_{10}^{81}BrN_2O_2$ , 100%); LRMS (ESI-): 291.1 (M-H,  $C_{12}H_8^{79}BrN_2O_2$ , 100%), 293.1 (M-H,  $C_{12}H_8^{81}BrN_2O_2$ , 100%).

Mass 123 mg

m.p. >150 °C (dec.)

yield 26 %

colour off white solid

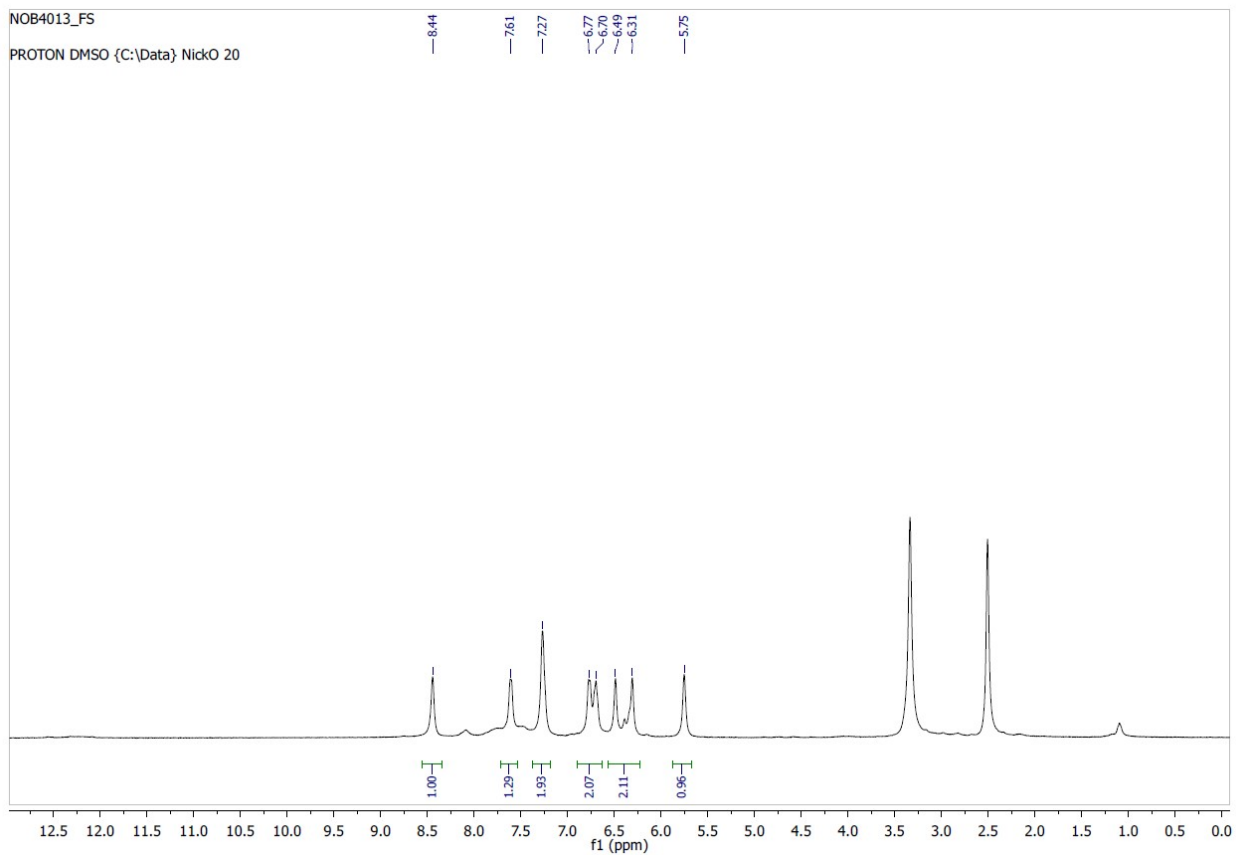

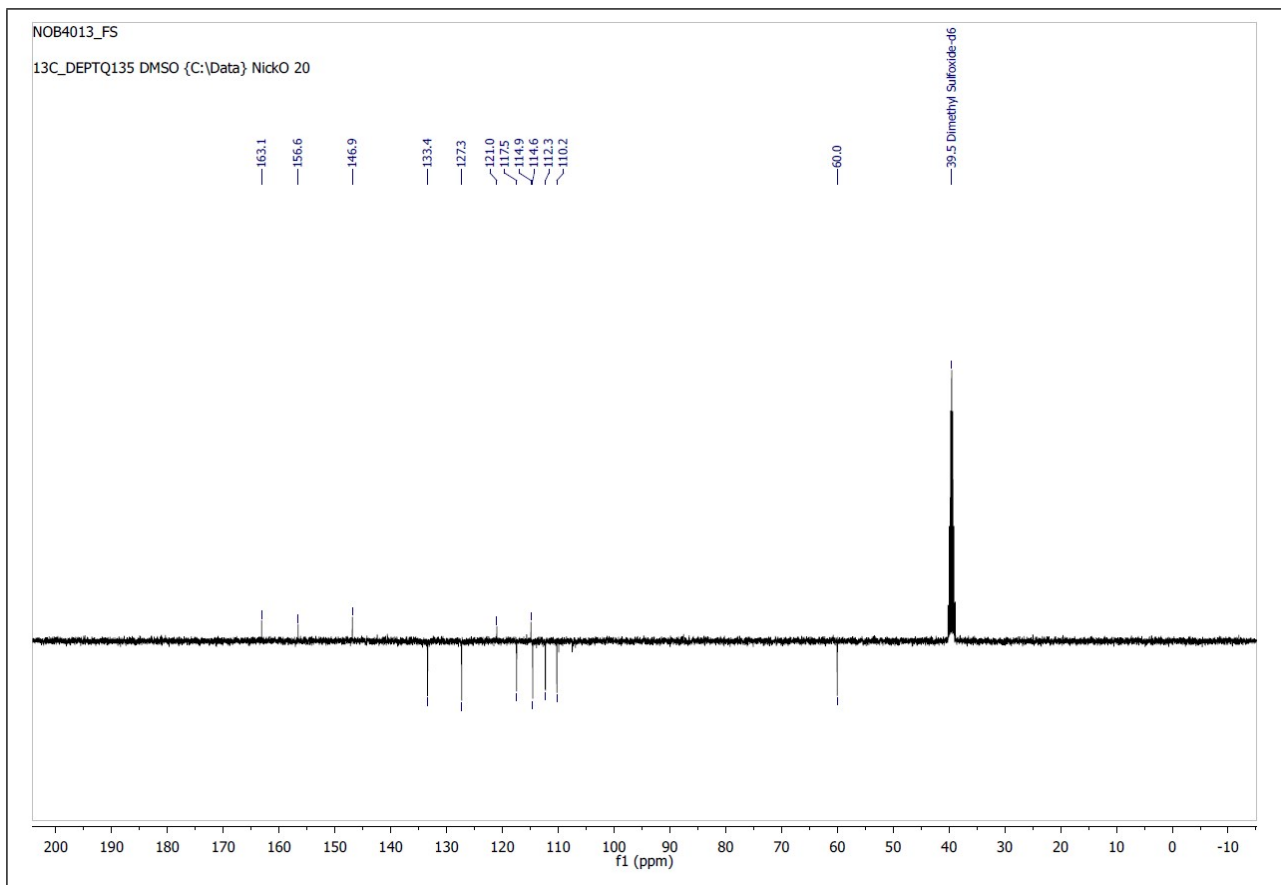

2-([1,1'-biphenyl]-4-yl)-2,3-dihydroquinazolin-4(1H)-one (**37**)

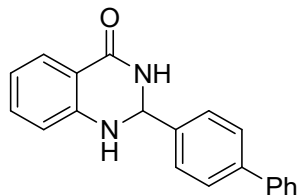

Chemical Formula: C<sub>20</sub>H<sub>16</sub>N<sub>2</sub>O

Exact Mass: 300.13

Molecular Weight: 300.35

IR (neat):  $\nu_{\max}$  = 3295 (NH), 3178 (NH), 2971 (CH), 1652 (C=O) cm<sup>-1</sup>

<sup>1</sup>H NMR (400 MHz, DMSO-d<sub>6</sub>)  $\delta$  8.35 (s, 1H), 7.70 – 7.67 (m, 5H), 7.58 (d, *J* = 8.3 Hz, 2H), 7.47 (dd, *J* = 10.4, 4.8 Hz, 2H), 7.39 – 7.37 (m, 1H), 7.26 (ddd, *J* = 8.6, 7.3, 1.6 Hz, 1H), 7.17 (s, 1H), 6.77 (d, *J* = 7.8 Hz, 1H), 6.71 – 6.67 (m, 1H), 5.81 (s, 1H).

<sup>13</sup>C NMR (100 MHz, DMSO-d<sub>6</sub>)  $\delta$  163.6, 147.8, 140.9, 140.3, 139.7, 133.4, 129.0 (2C), 127.5 (2C), 127.4, 126.7 (2C), 126.65 (2C), 117.2, 115.0, 114.4, 66.2. Quaternary carbon not observed.

LRMS (ESI<sup>+</sup>): 301.2 (M+H, C<sub>20</sub>H<sub>17</sub>N<sub>2</sub>O, 100%); LRMS (ESI<sup>-</sup>): 299.1 (M-H, C<sub>20</sub>H<sub>15</sub>N<sub>2</sub>O, 100%).

Mass 372.1 mg

m.p. 217 – 221 °C

yield 74 %

colour white solid

NOB4048\_FS

PROTON DMSO (C:\Data) NickO 28

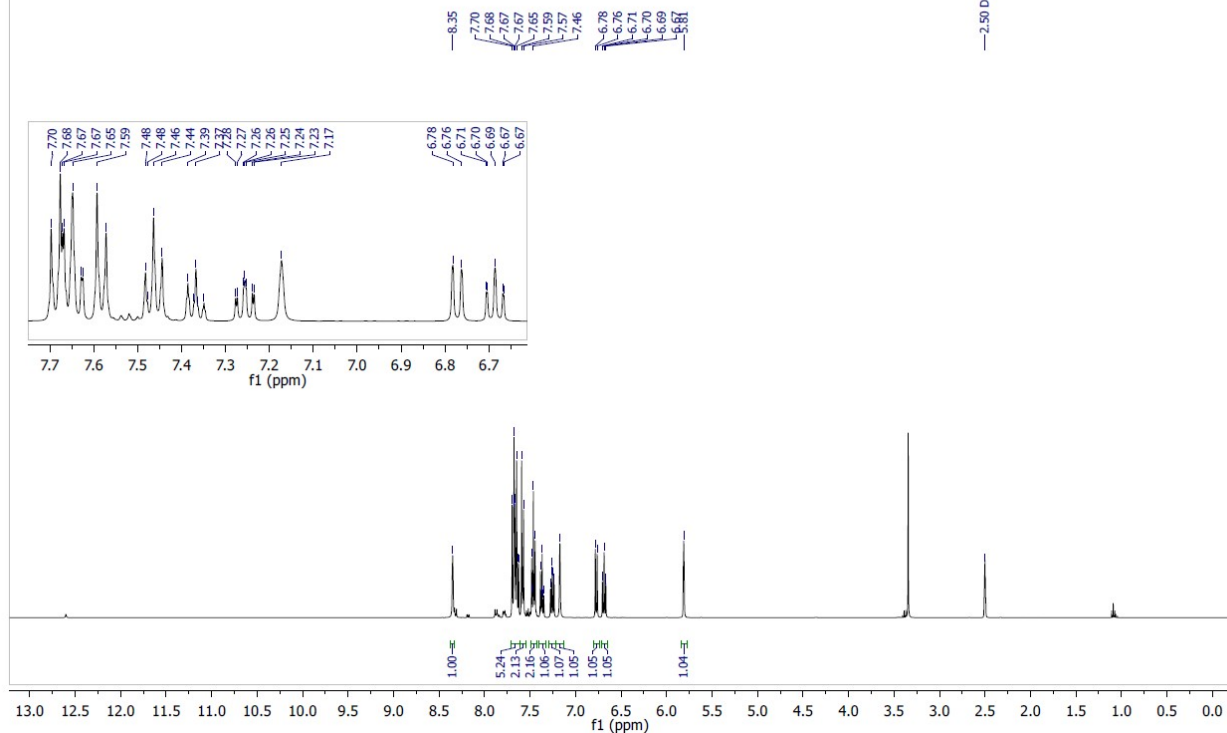

NOB4048\_FS

13C\_DEPTQ135 DMSO (C:\Data) NickO 28

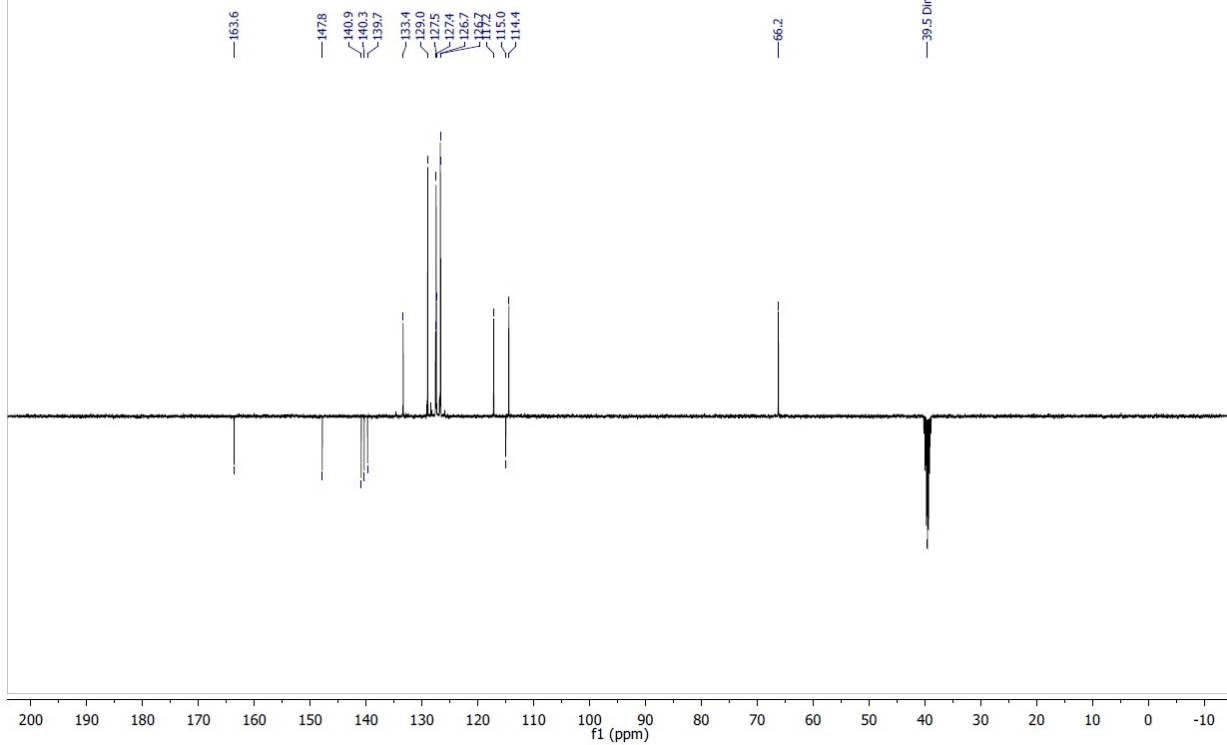

2-(naphthalen-2-yl)-2,3-dihydroquinazolin-4(1H)-one (38)

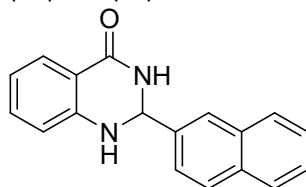

Chemical Formula: C<sub>18</sub>H<sub>14</sub>N<sub>2</sub>O

Exact Mass: 274.11

Molecular Weight: 274.32

IR (neat):  $\nu_{\max}$  = 3275 (NH), 8978 (CH), 1646 (C=O) cm<sup>-1</sup>

<sup>1</sup>H NMR (400 MHz, DMSO-d<sub>6</sub>)  $\delta$  8.37 (s, 1H), 7.96 – 7.90 (m, 4H), 7.70 (dd, *J* = 8.6, 1.6 Hz, 1H), 7.64 (dd, *J* = 7.7, 1.5 Hz, 1H), 7.53 (dd, *J* = 6.2, 3.3 Hz, 2H), 7.25 (ddd, *J* = 8.3, 7.3, 1.6 Hz, 1H), 7.19 (s, 1H), 6.77 (d, *J* = 7.7 Hz, 1H), 6.71 – 6.67 (m, 1H), 5.94 (s, 1H).

<sup>13</sup>C NMR (100 MHz, DMSO-d<sub>6</sub>)  $\delta$  163.6, 147.9, 138.9, 133.4, 133.0, 132.5, 128.1, 128.0, 127.6, 127.4, 126.43, 126.38, 125.9, 124.8, 117.2, 114.9, 114.4, 66.8.

LRMS (ESI+): 275.1 (M+H, C<sub>18</sub>H<sub>15</sub>N<sub>2</sub>O, 100%); LRMS (ESI-): 273.1 (M-H, C<sub>18</sub>H<sub>13</sub>N<sub>2</sub>O, 100%).

Mass: 374.3 mg

m.p. 202 – 206 °C

yield: 87 %

colour: white solid

NOB4083\_FS

PROTON DMSO {C:\Data} NickO 11

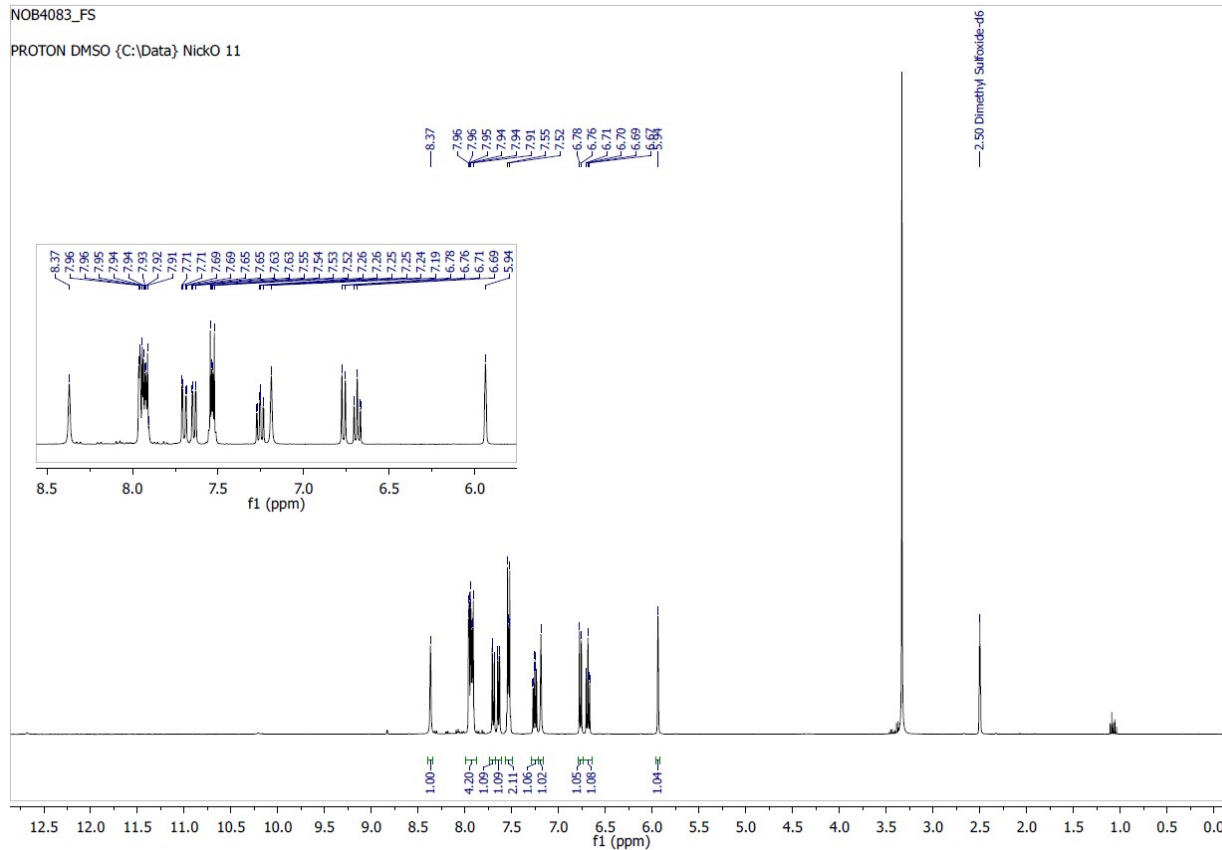



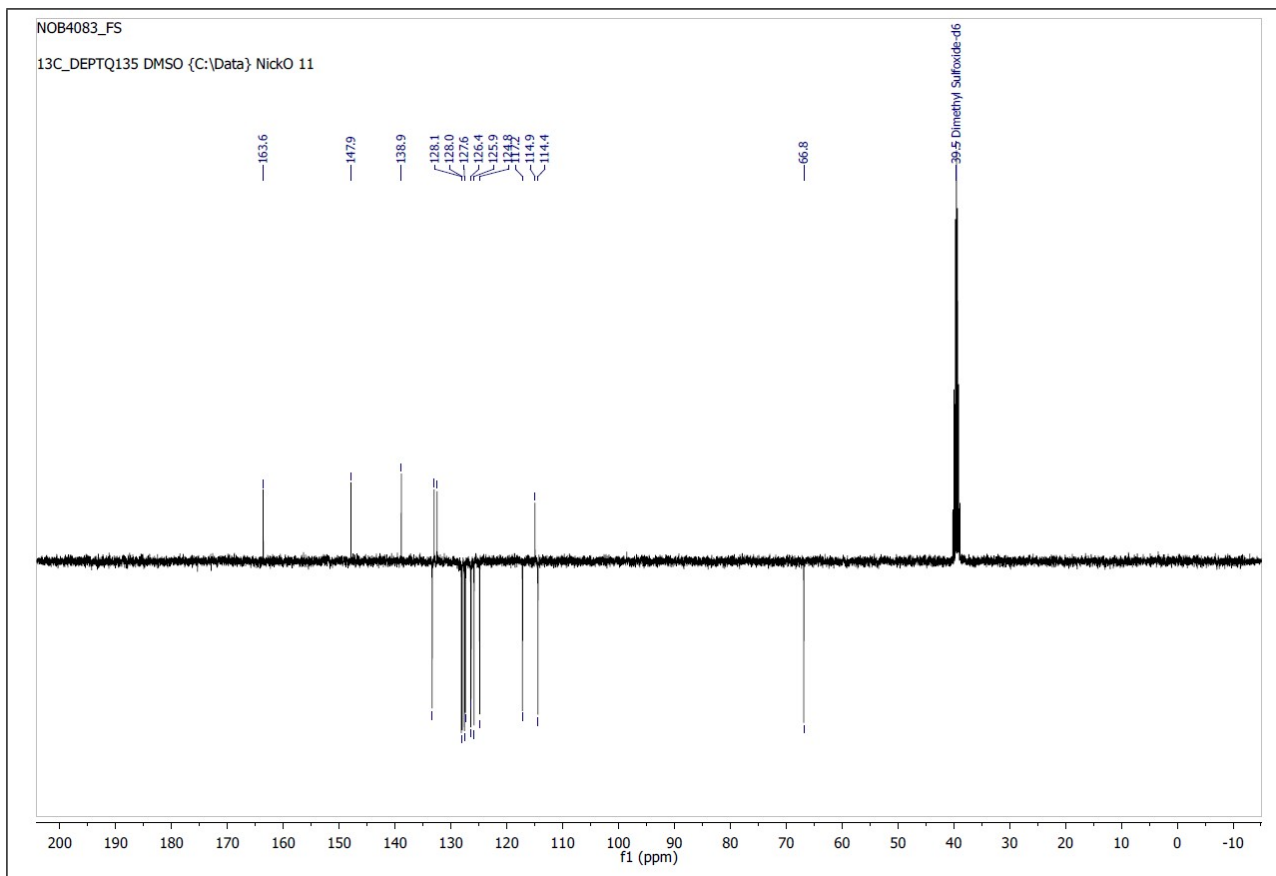

2-(naphthalen-1-yl)-2,3-dihydroquinazolin-4(1H)-one (**39**)

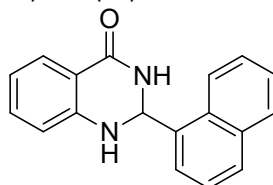

Chemical Formula: C<sub>18</sub>H<sub>14</sub>N<sub>2</sub>O

Exact Mass: 274.11

Molecular Weight: 274.32

**IR** (neat):  $\nu_{\max}$  = 3359, 3217 (NH), 3004, 1649 (C=O) cm<sup>-1</sup>

**<sup>1</sup>H NMR** (400 MHz, DMSO-d<sub>6</sub>)  $\delta$  8.57 – 8.54 (m, 1H), 8.27 (s, 1H), 8.01 – 7.96 (m, 2H), 7.72 – 7.69 (m, 2H), 7.59 – 7.51 (m, 3H), 7.28 – 7.24 (m, 1H), 7.08 (s, 1H), 6.76 – 6.71 (m, 2H), 6.49 (s, 1H).

**<sup>13</sup>C NMR** (100 MHz, DMSO-d<sub>6</sub>)  $\delta$  164.5, 148.9, 135.6, 134.2, 133.7, 131.0, 129.8, 129.1, 128.0, 126.51, 126.50, 126.3, 125.7, 125.1, 117.7, 115.4, 115.0, 66.4.

**LRMS** (ESI+) 275.2 (M+H, C<sub>18</sub>H<sub>15</sub>N<sub>2</sub>O, 100%).

Mass: 129.9 mg

m.p. 182 – 186 °C

yield: 30 %

colour: off white solid

NOB3197\_FS  
PROTON DMSO {C:\Data} NickO 19

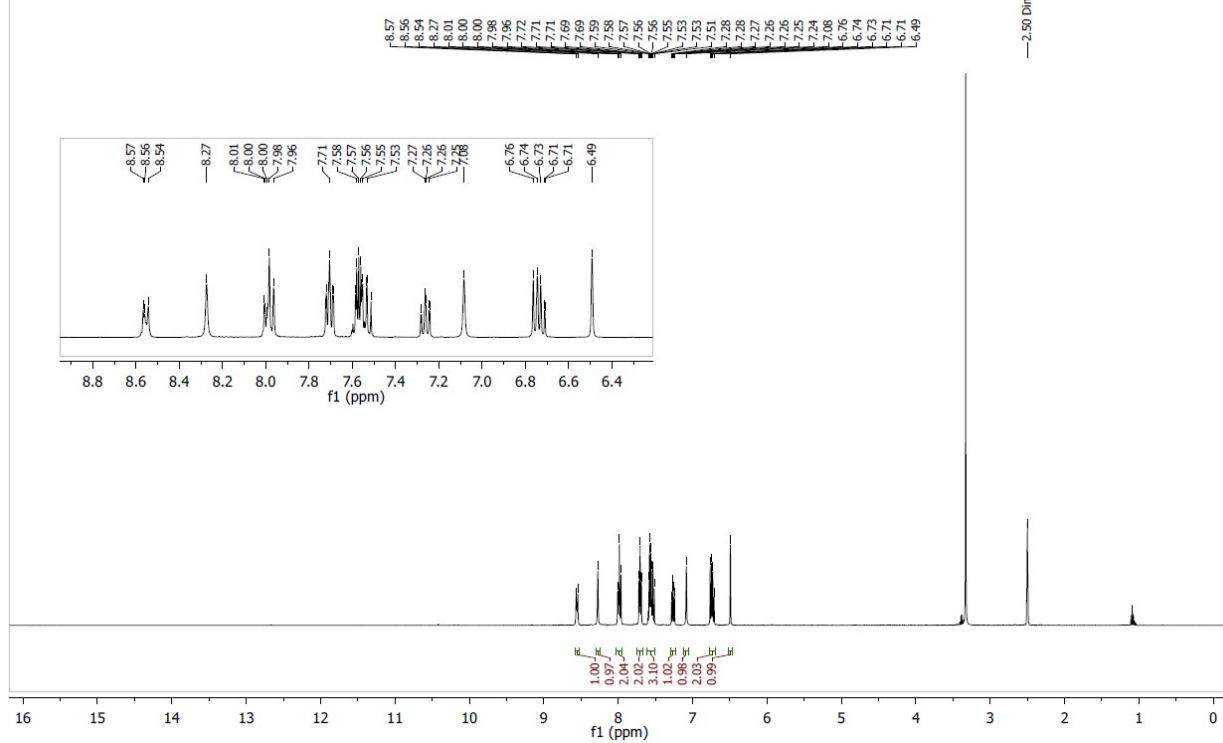

NOB3197\_FS  
13C DEPTQ135 DMSO {C:\Data} NickO 19

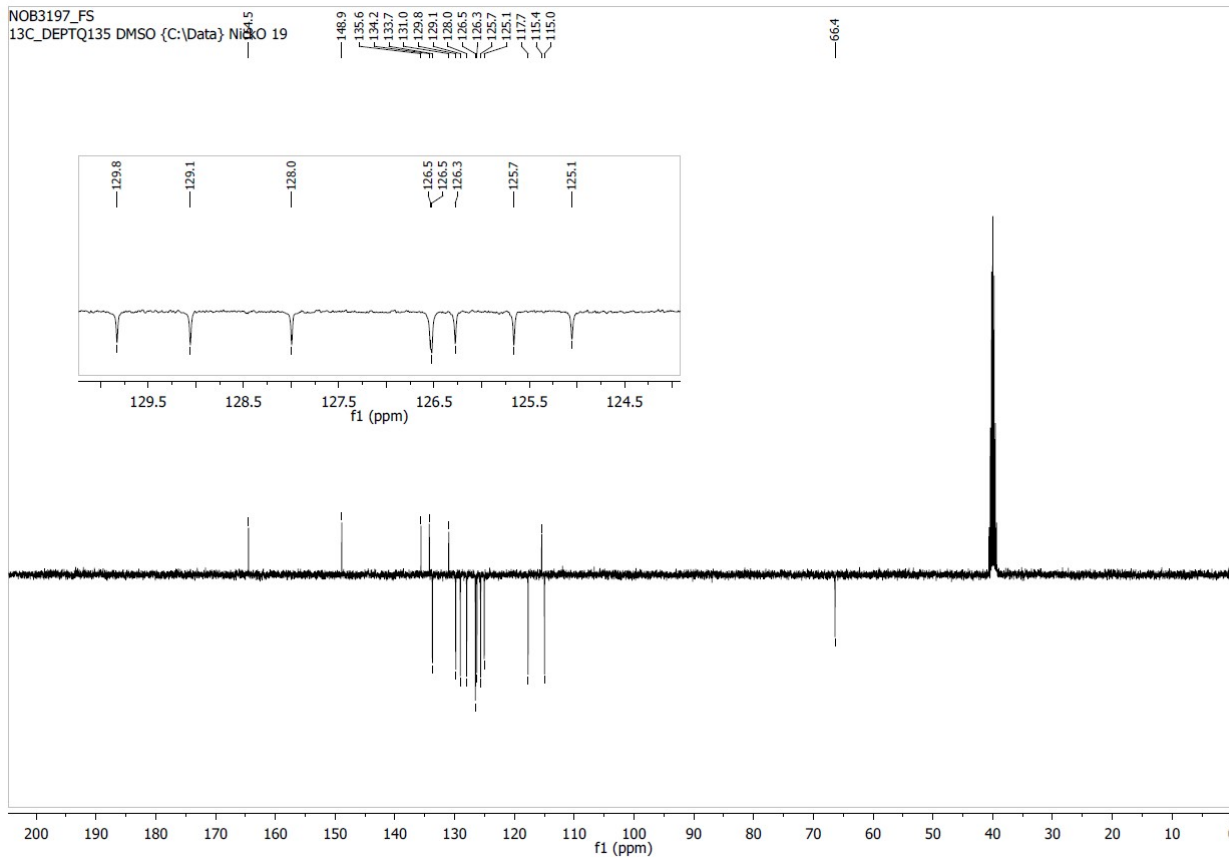

2-(benzofuran-2-yl)-2,3-dihydroquinazolin-4(1H)-one (40)

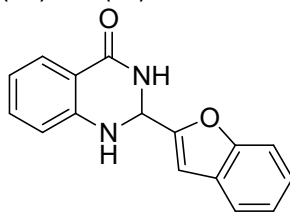

Chemical Formula:  $C_{16}H_{12}N_2O_2$

Exact Mass: 264.09

Molecular Weight: 264.28

IR (neat):  $\nu_{\max}$  = 3269 (NH), 3178 (NH), 3010, 1662 (C=O)  $cm^{-1}$

$^1H$  NMR (400 MHz, DMSO- $d_6$ )  $\delta$  8.59 (d,  $J$  = 2.9 Hz, 1H), 7.61 (ddd,  $J$  = 8.3, 7.7, 1.1 Hz, 2H), 7.52 (dd,  $J$  = 8.2, 0.6 Hz, 1H), 7.42 (s, 1H), 7.30 – 7.19 (m, 3H), 6.79 (d,  $J$  = 7.7 Hz, 1H), 6.72 – 6.67 (m, 2H), 5.93 (t,  $J$  = 2.9 Hz, 1H).

$^{13}C$  NMR (100 MHz, DMSO- $d_6$ )  $\delta$  163.2, 157.3, 154.2, 146.9, 133.4, 127.5, 127.3, 124.6, 123.0, 121.4, 117.4, 115.0, 114.6, 111.2, 104.0, 60.4.

LRMS (ESI+) 265.1 (M+H,  $C_{16}H_{13}N_2O_2$ , 100%); (ESI-): 263.1 (M-H,  $C_{16}H_{11}N_2O_2$ , 100%).

Mass: 171.4 mg

m.p. 192 – 198 °C

yield: 71%

colour: white solid

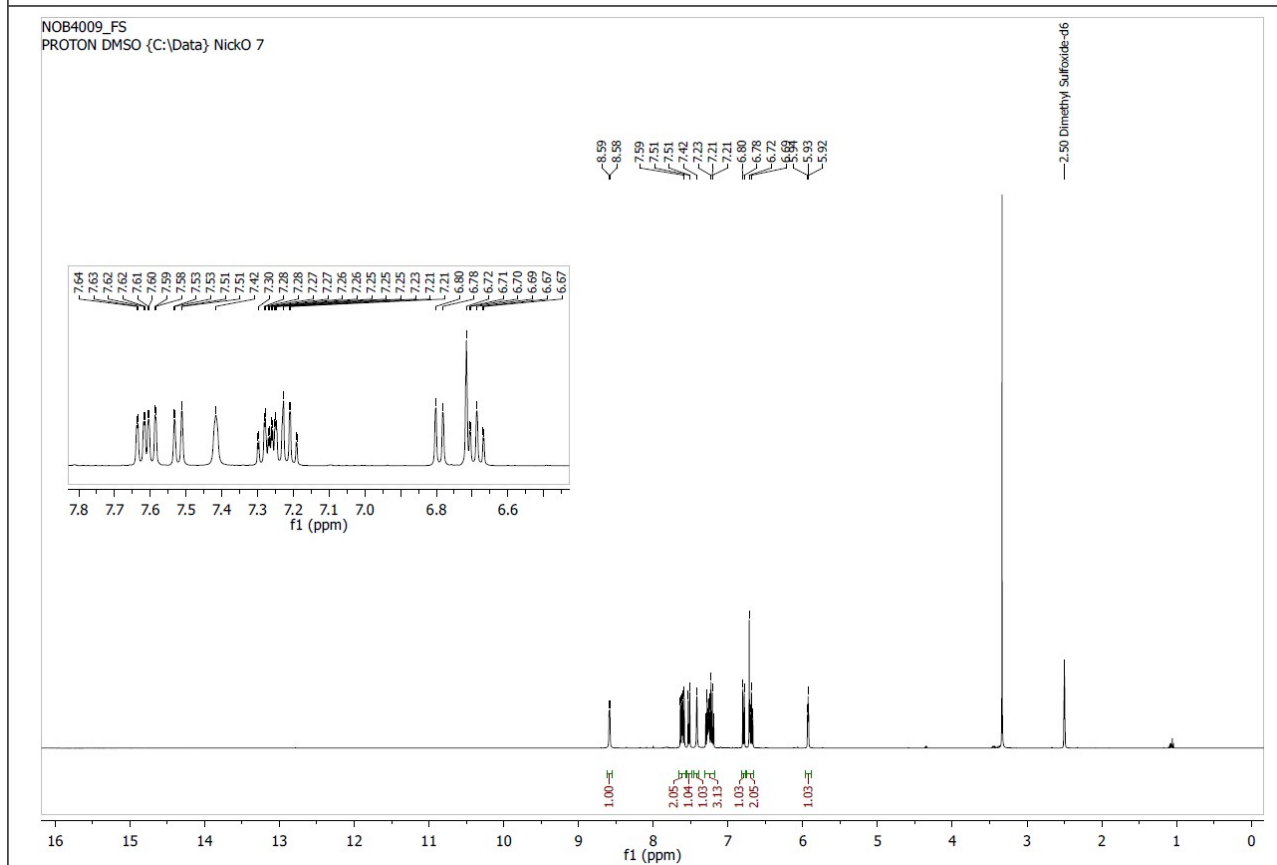

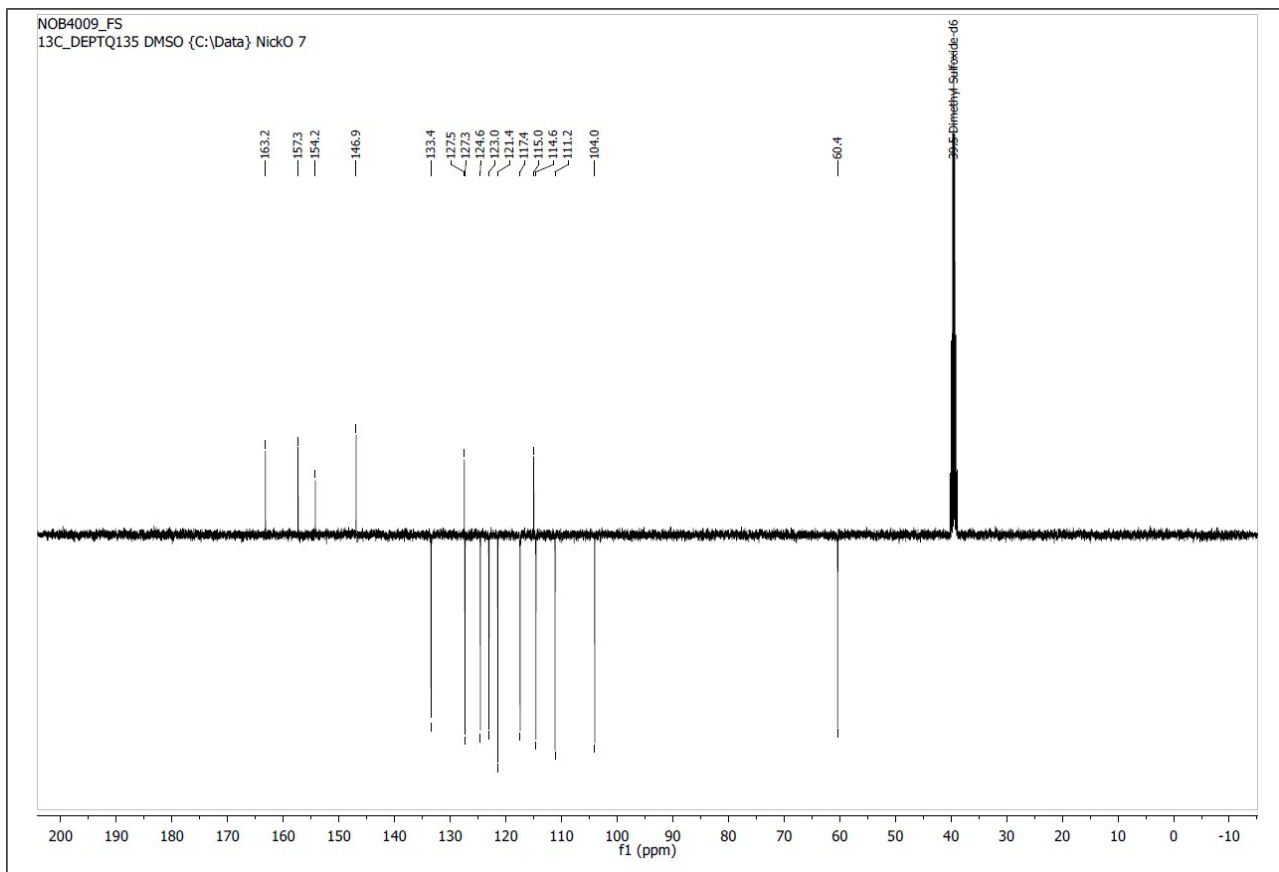

2-(1H-indol-3-yl)-2,3-dihydroquinazolin-4(1H)-one (**41**)

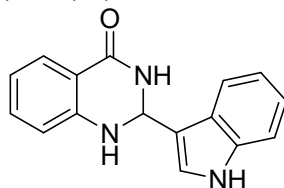

Chemical Formula: C<sub>16</sub>H<sub>13</sub>N<sub>3</sub>O

Exact Mass: 263.11

Molecular Weight: 263.29

**IR** (neat):  $\nu_{\max}$  = 3579, 3398, 3185 (NH), 2991, 1641 (C=O) cm<sup>-1</sup>

**<sup>1</sup>H NMR** (400 MHz, DMSO-d<sub>6</sub>)  $\delta$  11.09 (s, 1H), 8.09 (s, 1H), 7.78 – 7.76 (m, 1H), 7.66 (dd, *J* = 7.8, 1.4 Hz, 1H), 7.41 – 7.39 (m, 2H), 7.24 (dt, 1H), 7.11 – 7.10 (m, 1H), 7.01 – 6.98 (m, 1H), 6.92 (s, 1H), 6.76 (d, *J* = 8.0 Hz, 1H), 6.71 – 6.68 (m, 1H), 6.04 (s, 1H).

**<sup>13</sup>C NMR** (100 MHz, DMSO-d<sub>6</sub>)  $\delta$  164.2, 148.8, 136.6, 133.0, 127.5, 125.4, 124.7, 121.4, 120.0, 118.8, 117.0, 115.3, 114.40, 114.41, 111.7, 61.7.

**LRMS** (ESI+) 264.1 (M+H, C<sub>16</sub>H<sub>14</sub>N<sub>3</sub>O, 100%); (ESI-): 262 (M-H, C<sub>16</sub>H<sub>12</sub>N<sub>3</sub>O, 100%).

Mass 219.5 mg

m.p. 196 – 216°C

yield 53 %

colour Light orange solid

NOB3178\_fs  
PROTON DMSO {C:\Data} NickO 27

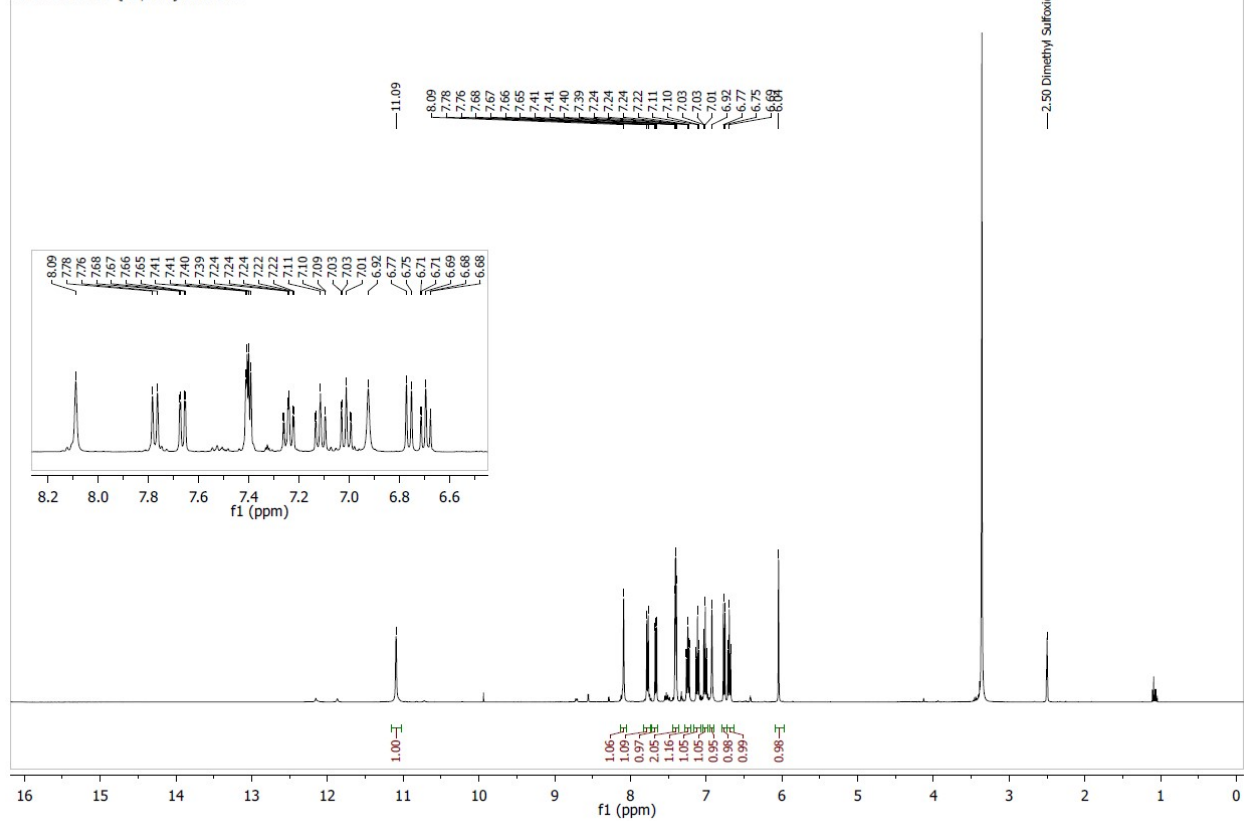

NOB3178\_fs  
13C\_DEPTQ135 DMSO {C:\Data} NickO 27

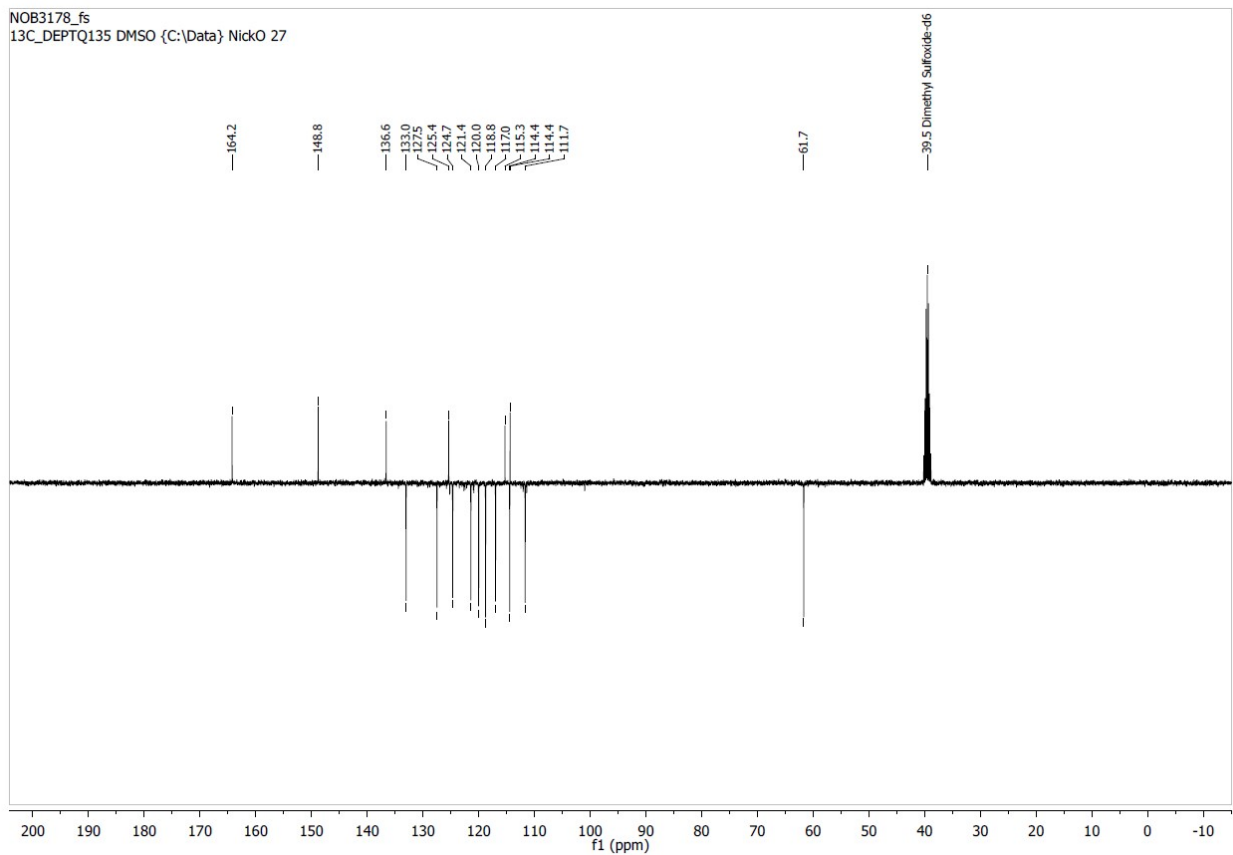

2-(benzo[c][1,2,5]thiadiazol-5-yl)-2,3-dihydroquinazolin-4(1H)-one (**42**)

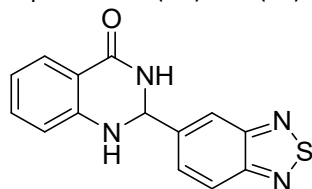

Chemical Formula: C<sub>14</sub>H<sub>10</sub>N<sub>4</sub>OS

Exact Mass: 282.06

Molecular Weight: 282.32

IR (neat):  $\nu_{\max}$  = 3243 (NH), 3029.1654 (C=O) cm<sup>-1</sup>

<sup>1</sup>H NMR (400 MHz, DMSO-d<sub>6</sub>)  $\delta$  8.54 (s, 1H), 8.13 (d, *J* = 9.2 Hz, 1H), 8.04 (s, 1H), 7.92 (dd, *J* = 9.1, 1.6 Hz, 1H), 7.63 (dd, *J* = 7.7, 1.3 Hz, 1H), 7.35 (s, 1H), 7.29 – 7.25 (m, 1H), 6.79 (d, *J* = 8.0 Hz, 1H), 6.72 – 6.65 (m, 1H), 6.01 (s, 1H).

<sup>13</sup>C NMR (10 MHz, DMSO-d<sub>6</sub>)  $\delta$  163.4, 154.2, 154.0, 147.4, 143.6, 133.6, 129.2, 127.4, 121.5, 118.5, 117.4, 114.9, 114.5, 65.8.

LRMS (ESI+) 283.1 (M+H, C<sub>14</sub>H<sub>11</sub>N<sub>4</sub>OS, 100%); (ESI-): 281.1 (M-H, C<sub>14</sub>H<sub>9</sub>N<sub>4</sub>OS, 100%).

Mass: 112.4 mg

m.p. 216-218 °C

yield: 48 %

colour: fine brown solid

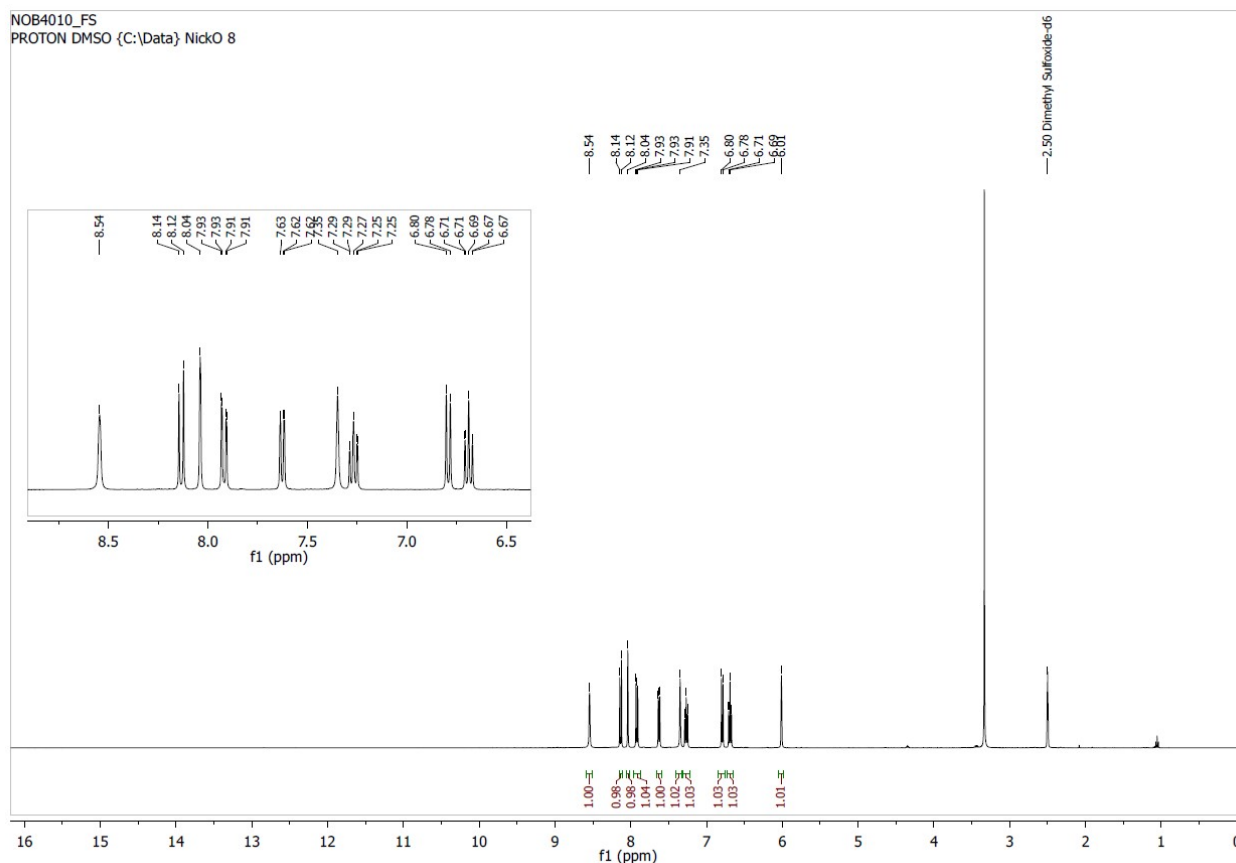

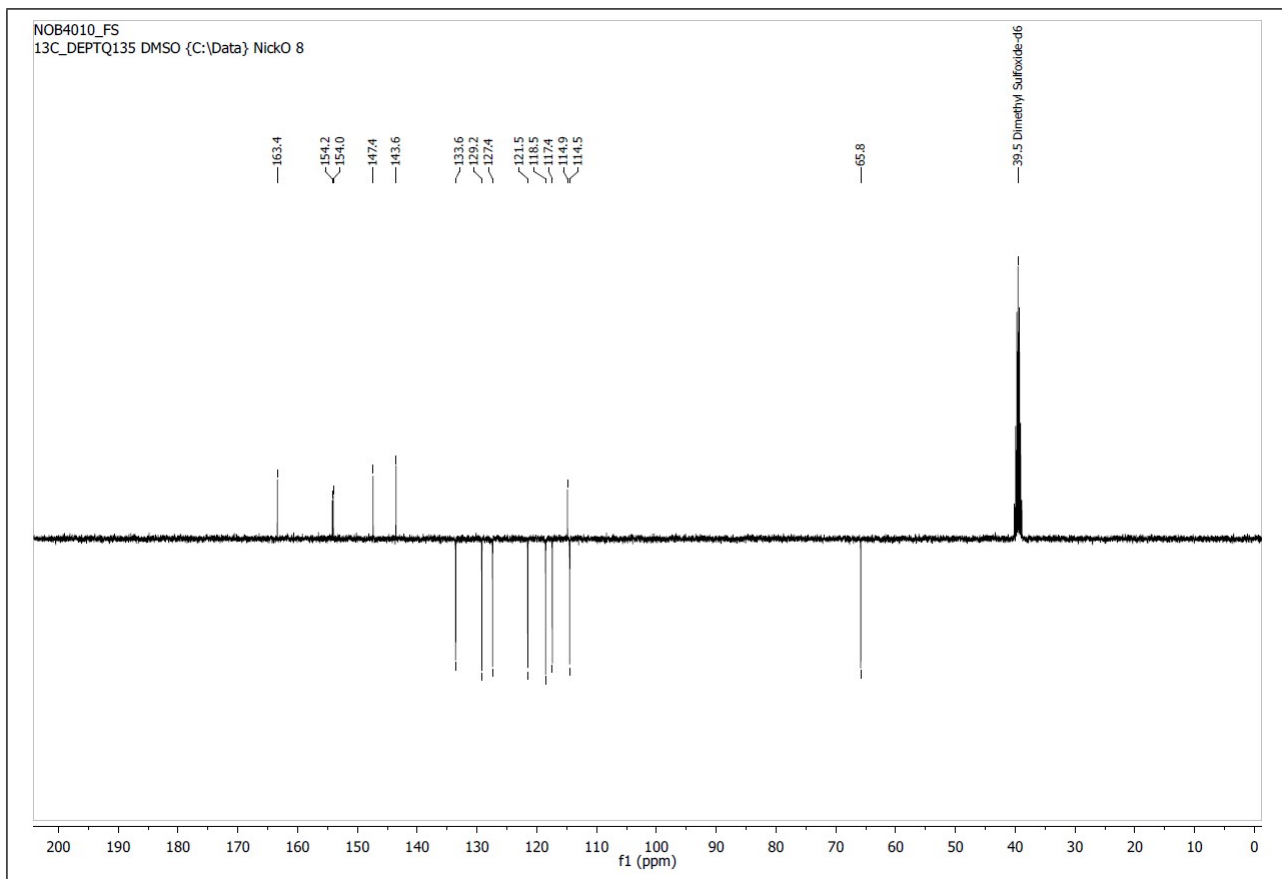

2-phenethyl-2,3-dihydroquinazolin-4(1H)-one (**43**)

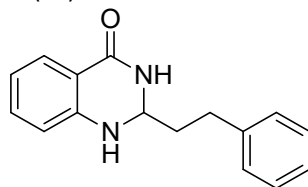

Chemical Formula:  $C_{16}H_{16}N_2O$

Exact Mass: 252.13

Molecular Weight: 252.31

**IR** (neat):  $\nu_{max}$  = 3302 (NH), 3175 (NH), 3000 ( $CH_2$ ), 1647 (C=O)  $cm^{-1}$

**$^1H$  NMR** (400 MHz, DMSO- $d_6$ )  $\delta$  8.02 (s, 1H, NH, H<sub>3</sub>), 7.60 (dd,  $J$  = 7.7, 1.5 Hz, 1H), 7.32 – 7.15 (m, 6H), 6.77 – 6.73 (m, 1H), 6.71 – 6.65 (m, 2H), 4.74 (t,  $J$  = 5.0 Hz, 1H, H<sub>2</sub>), 2.79 – 2.72 (m, 2H), 1.97 – 1.89 (m, 2H).

**$^{13}C$  NMR** (100 MHz, DMSO- $d_6$ )  $\delta$  164.1, 148.6, 141.6, 133.1, 128.4 (2C), 128.3 (2C), 127.4, 125.8, 117.1, 115.1, 114.4, 64.0, 36.7, 29.3.

**LRMS** (ESI+)  $m/z$ : 253.2 (M+H,  $C_{16}H_{17}N_2O$ , 100%); (ESI-), 251.1 (M-H,  $C_{16}H_{15}N_2O$ , 100%), 297.2 (M+FA-H,  $C_{16}H_{15}N_2O$ , 100%).

Mass: 158.5 mg

m.p. >128°C (decomp.)

Yield: 39 %

Yellow solid

NOB2138\_FS

1H DMSO {C:\Data} NickO 25

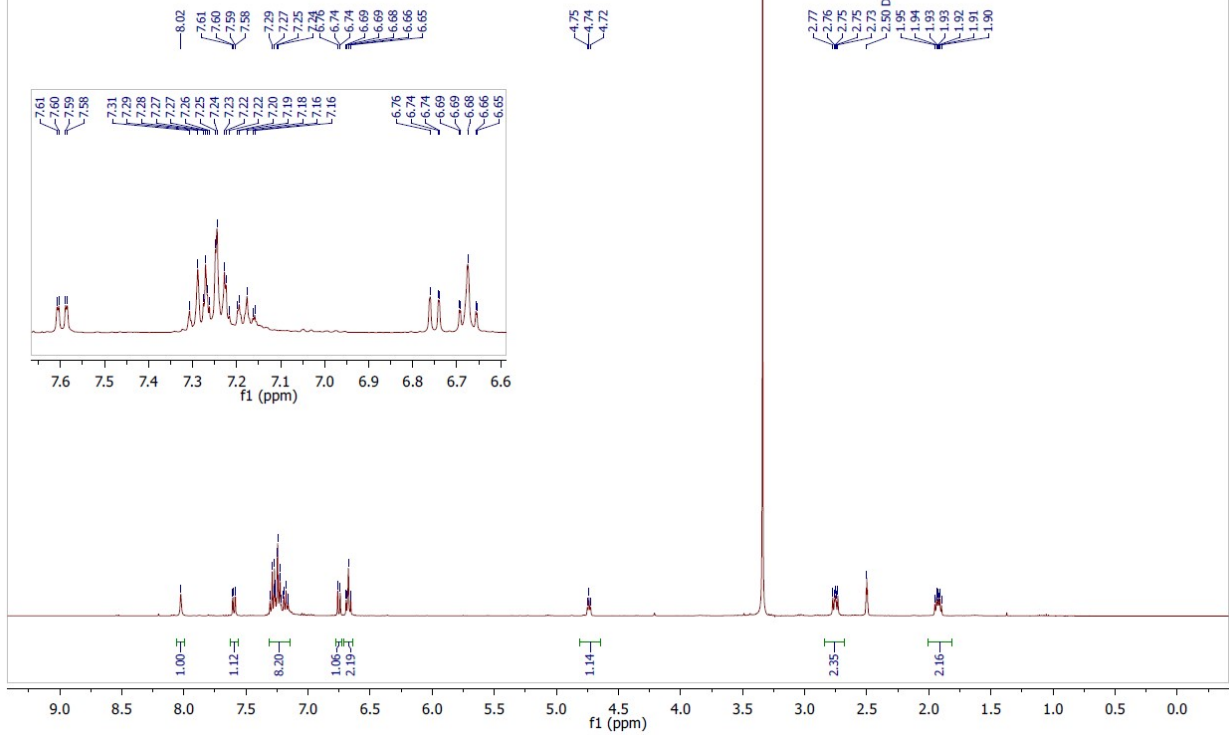

NOB2138\_FS

13C\_3hours DMSO {C:\Data} NickO 25

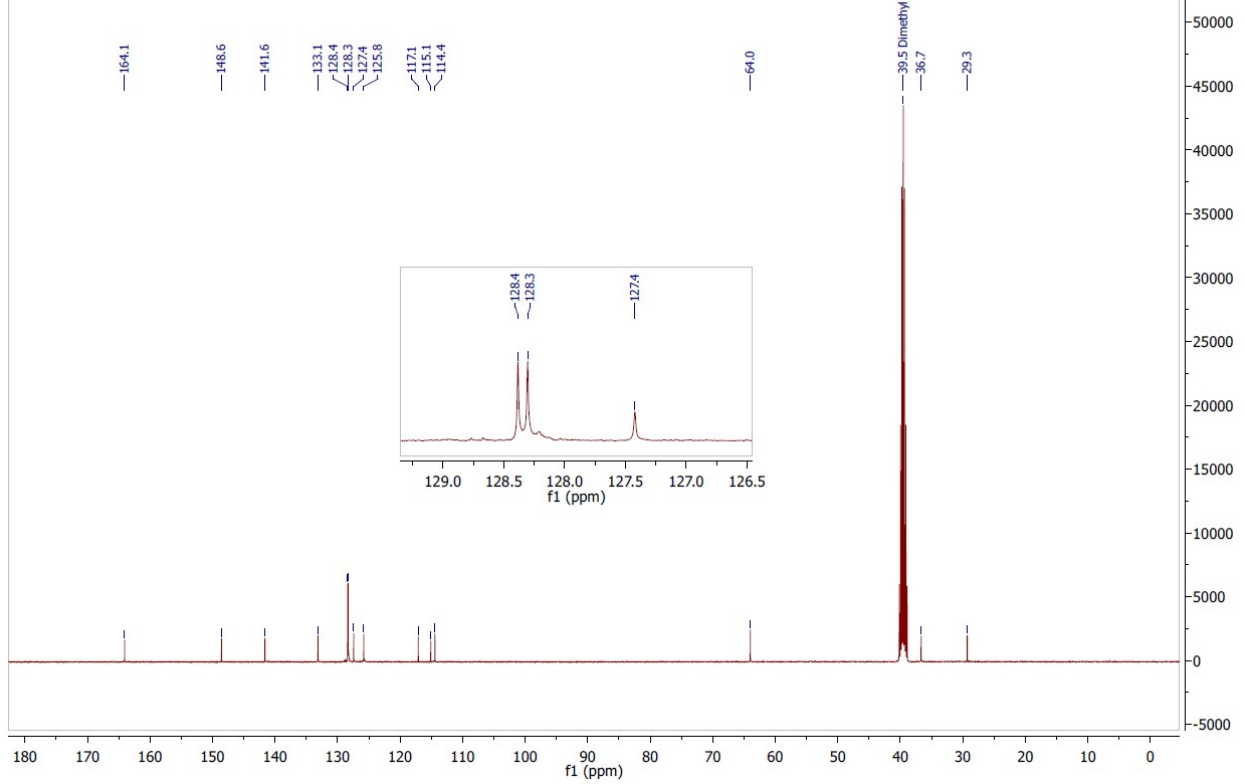



2-(1-bromo-2-phenylvinyl)-2,3-dihydroquinazolin-4(1H)-one (**44**)

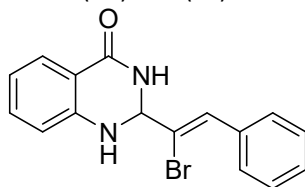

Chemical Formula:  $C_{16}H_{13}BrN_2O$

Exact Mass: 328.02

Molecular Weight: 329.19

IR (neat):  $\nu_{max}$  = 3263 (NH), 3178 (NH), 3053 (CH), 1646 (C=O)  $cm^{-1}$

$^1H$  NMR (400 MHz, DMSO- $d_6$ )  $\delta$  8.30 (d,  $J$  = 1.3 Hz, 1H), 7.64 – 7.63 (m, 2H), 7.58 (dd,  $J$  = 7.7, 1.4 Hz, 1H), 7.43 – 7.39 (m, 2H), 7.37 (dd,  $J$  = 4.9, 3.6 Hz, 1H), 7.25 – 7.19 (m, 3H), 6.72 (d,  $J$  = 8.0 Hz, 1H), 6.62 (t, 1H), 5.64 (s, 1H).

$^{13}C$  NMR (100 MHz, DMSO- $d_6$ )  $\delta$  162.6, 146.9, 134.3, 133.4, 129.6, 129.0 (2C), 128.6, 128.5, 128.5, 128.4 (2C), 127.0, 116.6, 113.6, 113.4, 70.6,

LRMS (ESI+): 329.1 (M+H,  $C_{16}H_{13}^{79}BrN_2O$ , 100%) 331.1 (M+H,  $C_{16}H_{13}^{81}BrN_2O$ , 95%).

Mass 211.8 mg

m.p. 180 – 183 °C

yield 40 %

colour light yellow solid

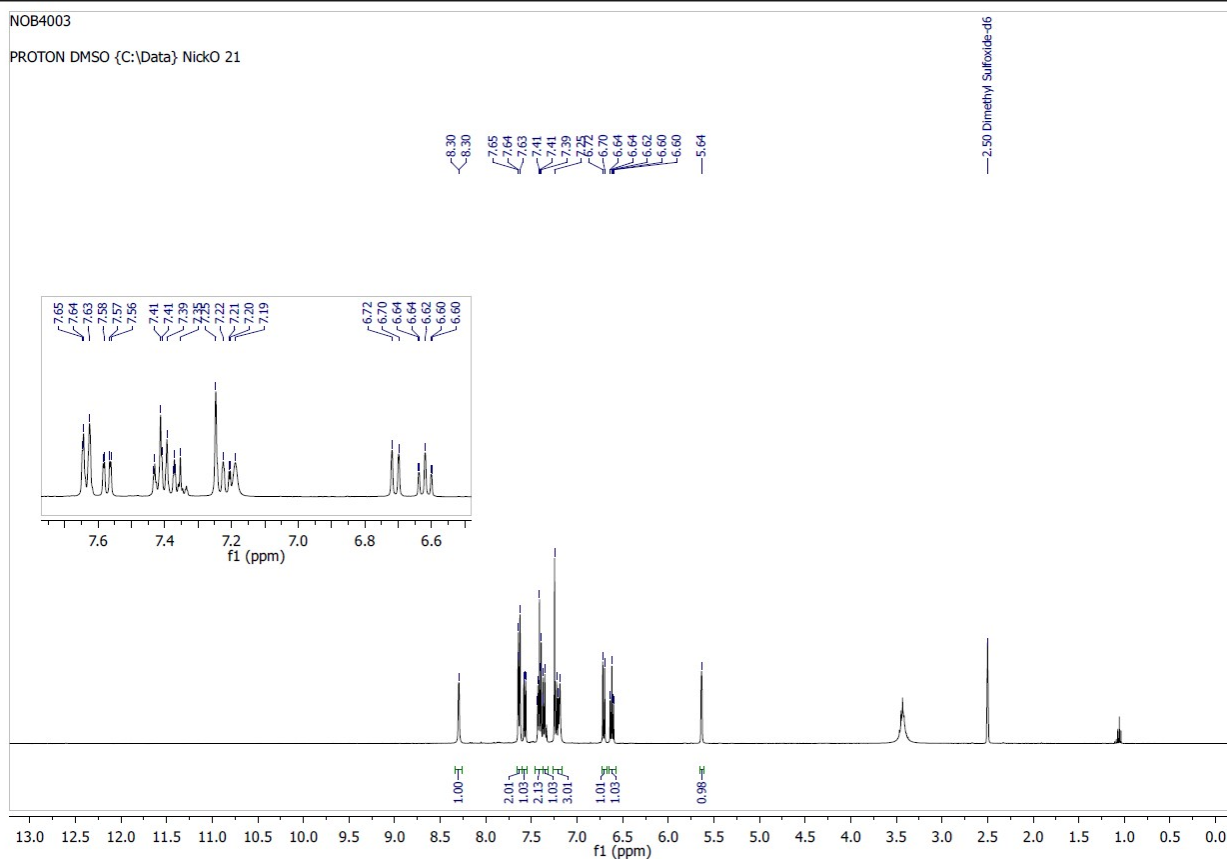

2-(2-nitrostyryl)-2,3-dihydroquinazolin-4(1H)-one (45)

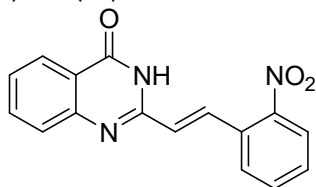

Chemical Formula: C<sub>16</sub>H<sub>11</sub>N<sub>3</sub>O<sub>3</sub>

Exact Mass: 293.08

Molecular Weight: 293.28

IR (neat):  $\nu_{\max}$  = 3249 (NH), 2971 (NH), 1668 (C=O), 1519 (NO), 1349 (NO) cm<sup>-1</sup>

<sup>1</sup>H NMR (400 MHz, DMSO-d<sub>6</sub>)  $\delta$  8.50 (d, *J* = 8.9 Hz, 1H), 8.35 (s, 1H), 8.09 (d, *J* = 7.0 Hz, 1H), 8.05 (dd, *J* = 8.1, 1.1 Hz, 1H), 7.94 (dd, *J* = 7.8, 1.5 Hz, 1H), 7.81 – 7.76 (m, 1H), 7.74 (d, *J* = 15.8 Hz, 1H), 7.68 – 7.62 (m, 2H), 7.53 (td, *J* = 7.7, 1.6 Hz, 1H), 7.37 – 7.31 (m, 2H), 7.23 – 7.21 (m, 1H).

<sup>13</sup>C NMR (100 MHz, DMSO-d<sub>6</sub>)  $\delta$  167.1, 163.2, 149.0, 148.2, 139.3, 133.6, 132.4, 131.9, 130.6, 129.9, 129.7, 128.7, 128.1, 126.3, 124.6, 118.9.

LRMS (ESI<sup>+</sup>): 296.1 (M+H, C<sub>16</sub>H<sub>14</sub>N<sub>3</sub>O<sub>3</sub>, 100%).

Mass 289 mg

m.p. 127 - 134 °C

yield 59 %

yellow solid

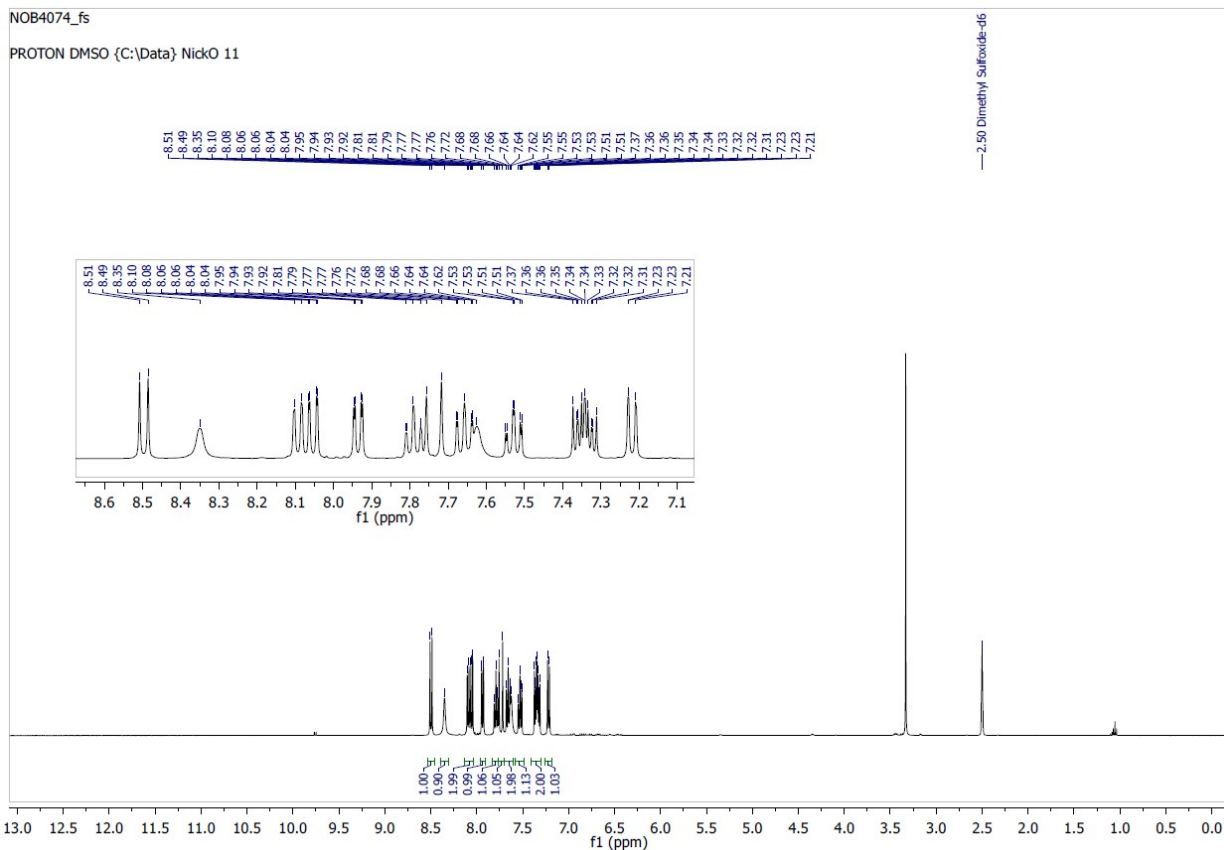

NOB4074\_fs

13C\_DEPTQ135 DMSO (C:\Data) NickO 11

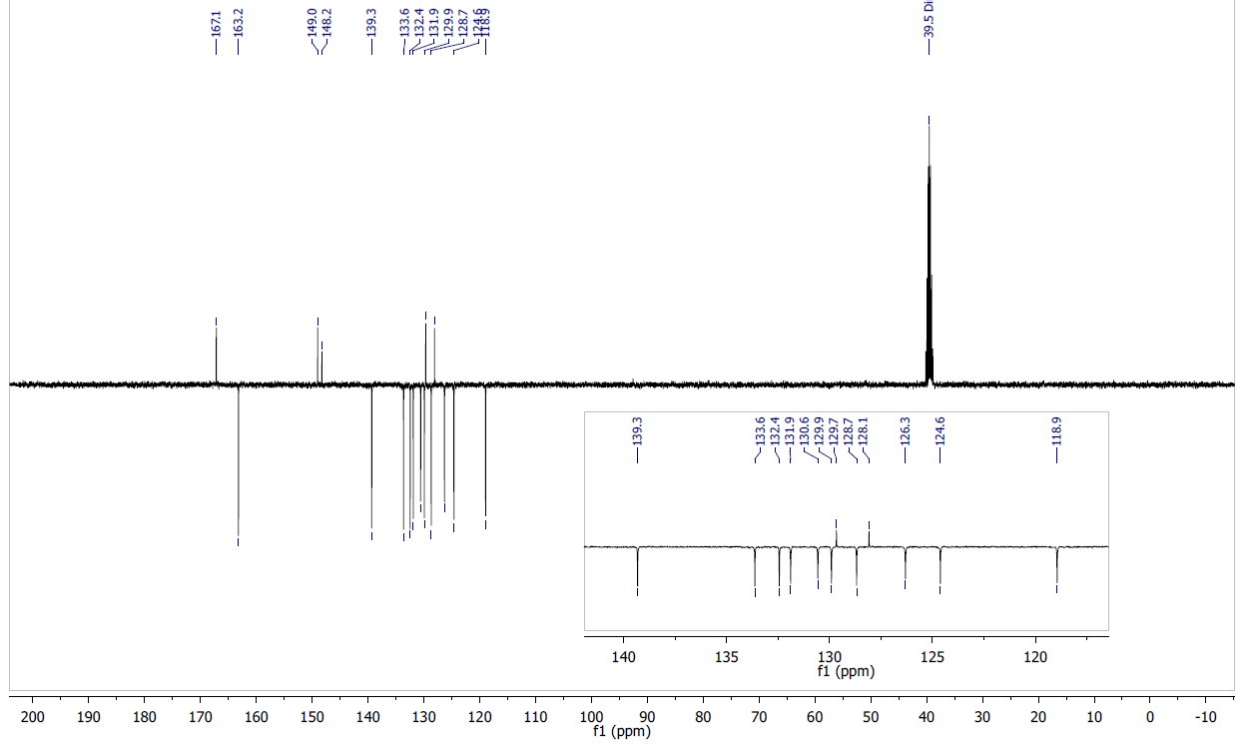

NOB4003\_FS

13C\_DEPTQ135 DMSO (C:\Data) NickO 21

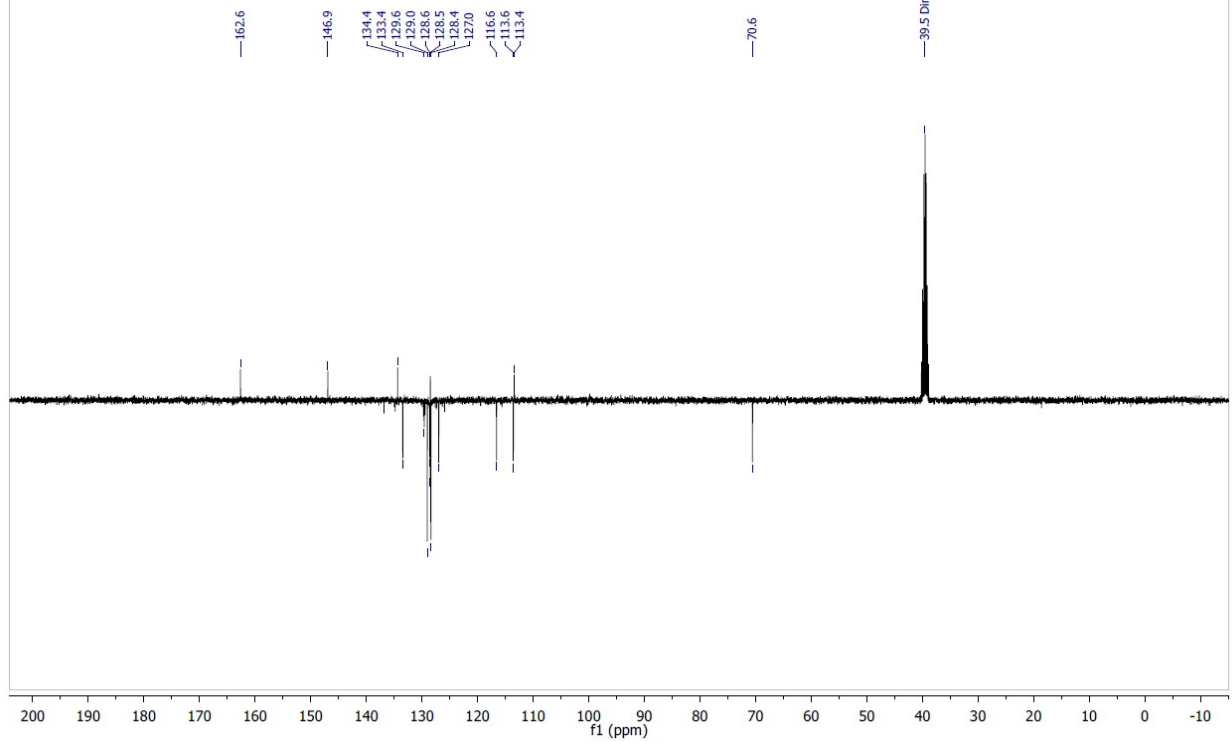

2-(2-(furan-2-yl)vinyl)-2,3-dihydroquinazolin-4(1H)-one (**46**)

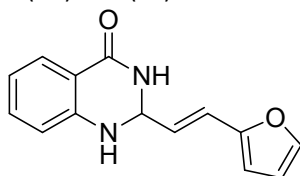

Chemical Formula: C<sub>14</sub>H<sub>12</sub>N<sub>2</sub>O<sub>2</sub>

Exact Mass: 240.09

Molecular Weight: 240.26

IR (neat):  $\nu_{\max}$  = 3236 (NH), 2971 (NH), 1634 (C=O). cm<sup>-1</sup>

<sup>1</sup>H NMR (400 MHz, DMSO-d<sub>6</sub>)  $\delta$  8.13 (s, 1H), 7.63 – 7.59 (m, 2H), 7.27 – 7.22 (m, 1H), 6.87 (s, 1H), 6.74 (d, *J* = 8.1 Hz, 1H), 6.71 – 6.65 (m, 1H), 6.54 – 6.48 (m, 3H), 6.12 (dd, *J* = 15.8, 6.5 Hz, 1H), 5.26 (d, *J* = 6.5 Hz, 1H).

<sup>13</sup>C NMR (100 MHz, DMSO-d<sub>6</sub>)  $\delta$  163.3, 151.1, 147.6, 143.2, 133.3, 127.3, 126.7, 119.9, 117.2, 114.9, 114.6, 111.8, 109.6, 65.0.

LRMS (ESI+): 241.1 (M+H, C<sub>14</sub>H<sub>13</sub>N<sub>2</sub>O<sub>2</sub>, 100%).

Mass 109 mg

m.p. 148 - 151 °C

yield 28 %

white solid

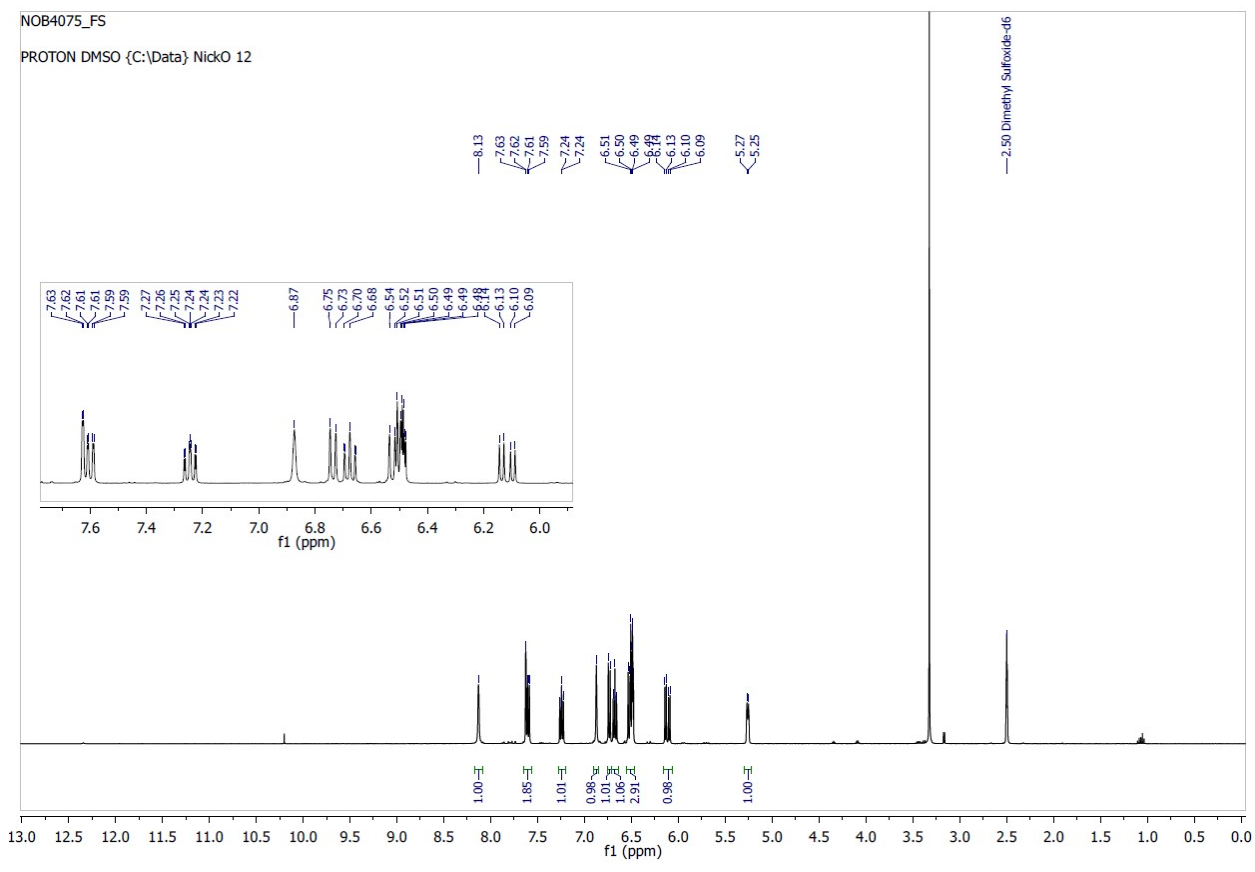

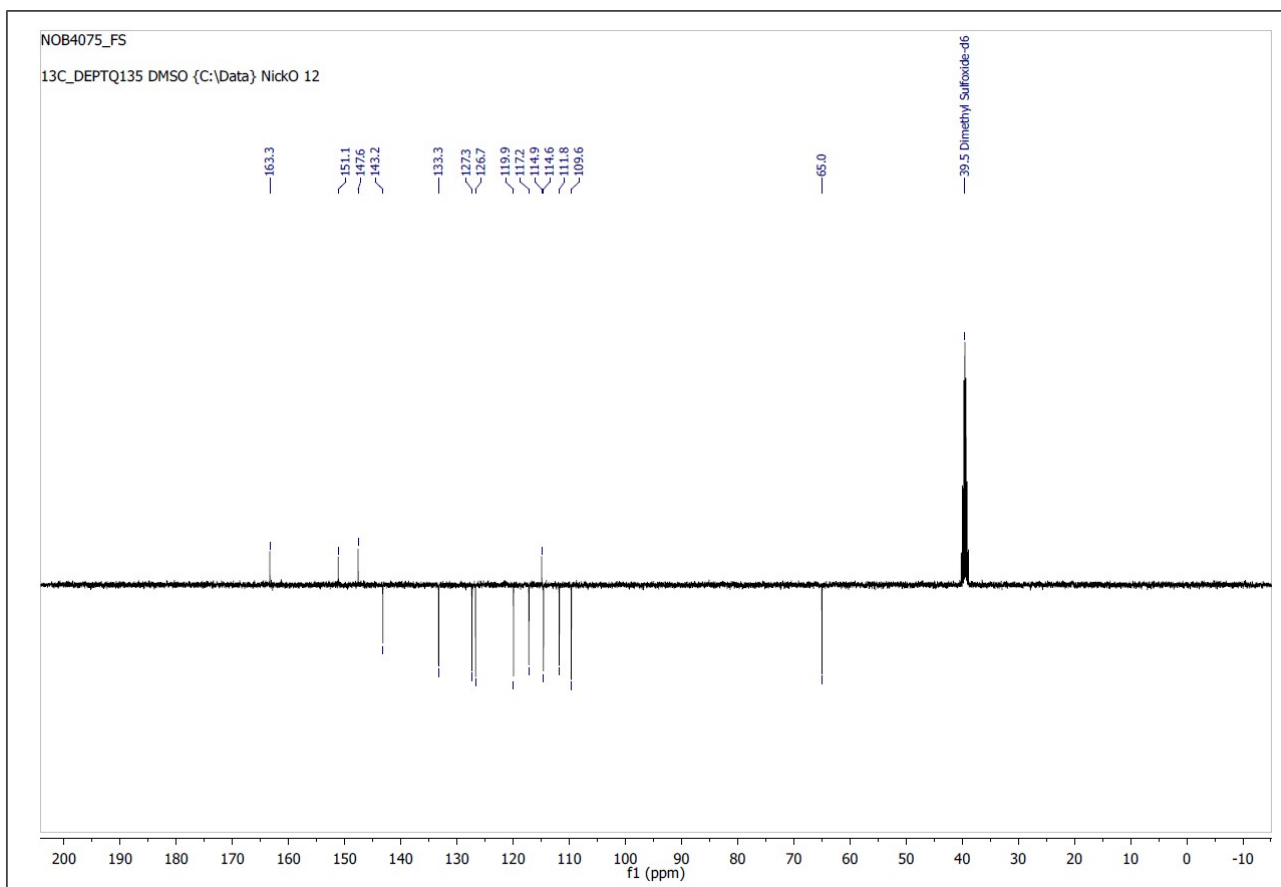

2-(5-methyl-1H-indol-3-yl)quinazolin-4(3H)-one (**47**)

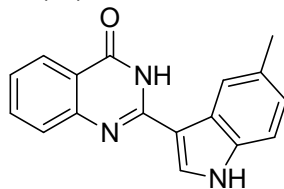

Chemical Formula: C<sub>17</sub>H<sub>13</sub>N<sub>3</sub>O

Exact Mass: 275.11

Molecular Weight: 275.30

**IR** (neat):  $\nu_{\max}$  = 3385 (NH), 3114 (NH), 2965, 1663 (C=O) cm<sup>-1</sup>

**<sup>1</sup>H NMR** (400 MHz, DMSO-d<sub>6</sub>)  $\delta$  12.09 (s, 1H), 11.74 (s, 1H), 8.50 - 8.49 (m, 2H), 8.10 (dd, *J* = 7.9, 1.0 Hz, 1H), 7.79–7.75 (m, 2H), 7.41 – 7.35 (m, 2H), 7.06 (dd, *J* = 8.3, 1.4 Hz, 1H), 2.47 (s, 3H).

**<sup>13</sup>C NMR** (100 MHz, DMSO-d<sub>6</sub>)  $\delta$  162.1, 150.4, 149.8, 135.2, 134.3, 129.6, 129.1, 127.0, 125.81, 125.80, 125.1, 124.1, 122.1, 120.4, 111.6, 108.1, 21.5.

**LRMS** (ESI+) 276.2 (M+H, C<sub>17</sub>H<sub>14</sub>N<sub>3</sub>O, 100%); (ESI-) 274.1 (M-H, C<sub>17</sub>H<sub>12</sub>N<sub>3</sub>O, 100%)

Mass 73.4 mg

m.p. >155 °C (decomp).

Yield 17 %

Colour pale pink solid

NOB3185\_FS  
PROTON DMSO {C:\Data} NickO 30

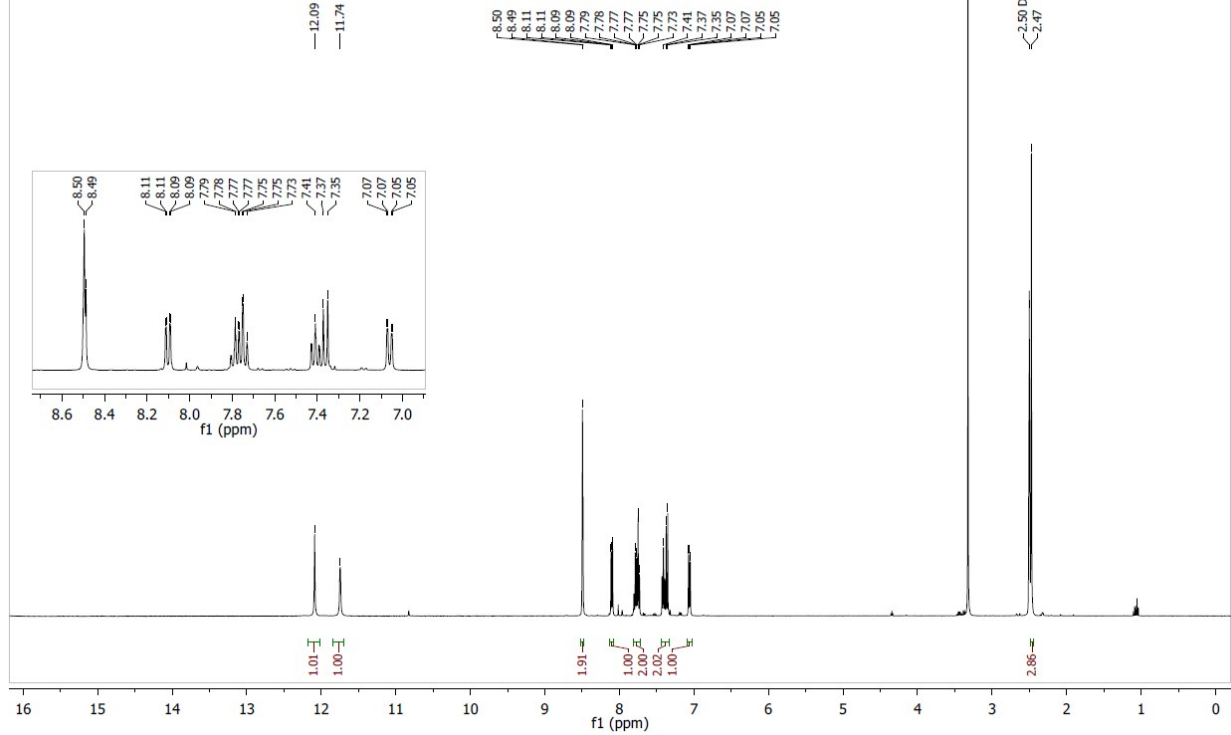

NOB3185\_FS  
13C\_DEPTQ135 DMSO {C:\Data} NickO 30

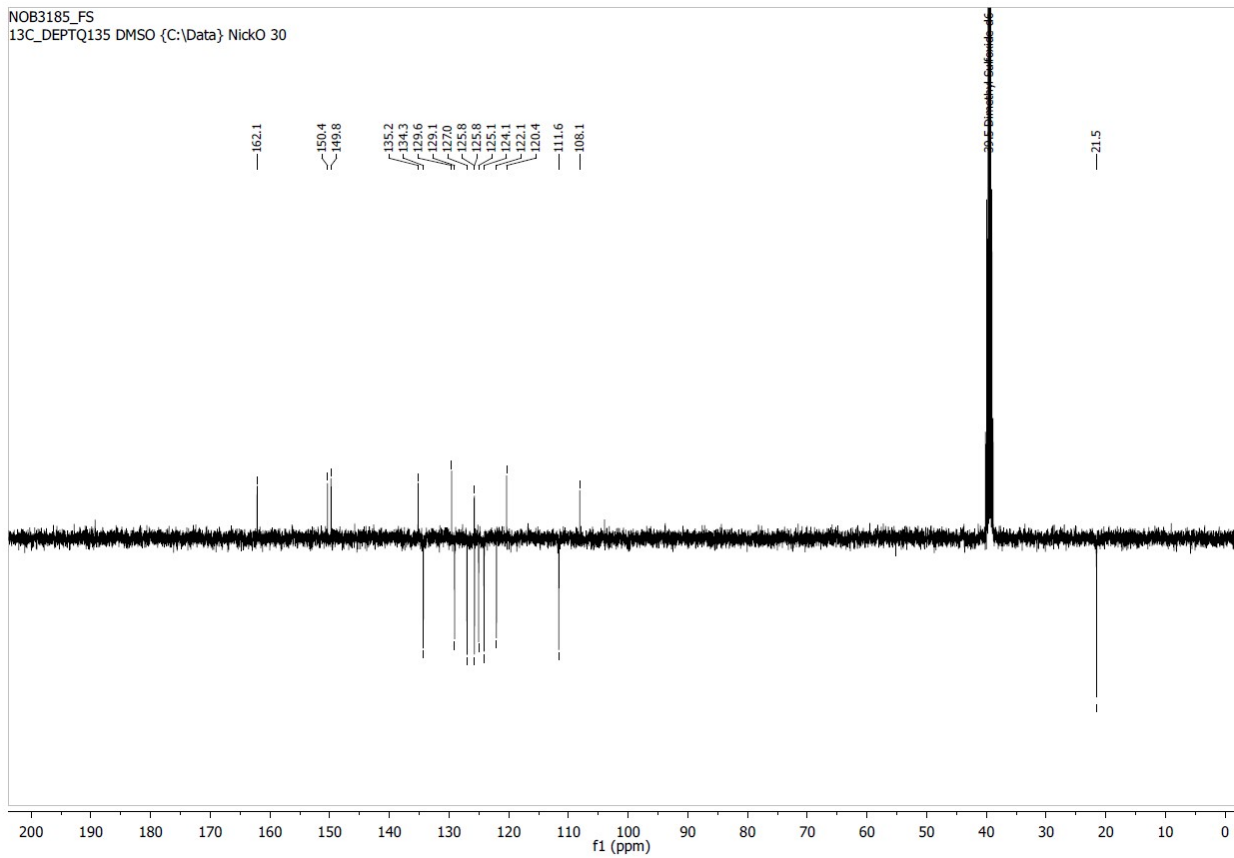

3-(4-oxo-3,4-dihydroquinazolin-2-yl)-1H-indole-5-carbonitrile (**48**)

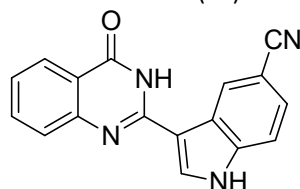

Chemical Formula: C<sub>17</sub>H<sub>10</sub>N<sub>4</sub>O

Exact Mass: 286.09

Molecular Weight: 286.29

IR (neat):  $\nu_{\max}$  = 3282 (NH), 3120 (NH), 2227 (CN), 1679 (C=O) cm<sup>-1</sup>

<sup>1</sup>H NMR (400 MHz, DMSO-d<sub>6</sub>)  $\delta$  12.35 (s, 1H), 12.30 (s, 1H), 9.10 (s, 1H), 8.71 (d, *J* = 2.5 Hz, 1H), 8.12 (d, *J* = 7.7 Hz, 1H), 7.80 (dt, *J* = 14.9, 7.5 Hz, 2H), 7.67 (t, *J* = 7.4 Hz, 1H), 7.61 (d, *J* = 8.2 Hz, 1H), 7.44 (dd, *J* = 15.9, 9.2 Hz, 1H).

<sup>13</sup>C NMR (100 MHz, DMSO-d<sub>6</sub>)  $\delta$  162.0, 149.4, 149.3, 138.7, 134.5, 131.4, 127.6, 127.3, 125.8, 125.6, 125.5, 125.3, 120.6, 120.5, 113.6, 109.3, 103.2.

LRMS (ESI+): 287.1 (M+H, C<sub>17</sub>H<sub>11</sub>N<sub>4</sub>O, 100%); LRMS (ESI-): 285.1 (M-H, C<sub>17</sub>H<sub>9</sub>N<sub>4</sub>O, 100%).

Mass 102.6 mg

m.p. >250°C (decomp.)

yield 21 %

colour yellow solid

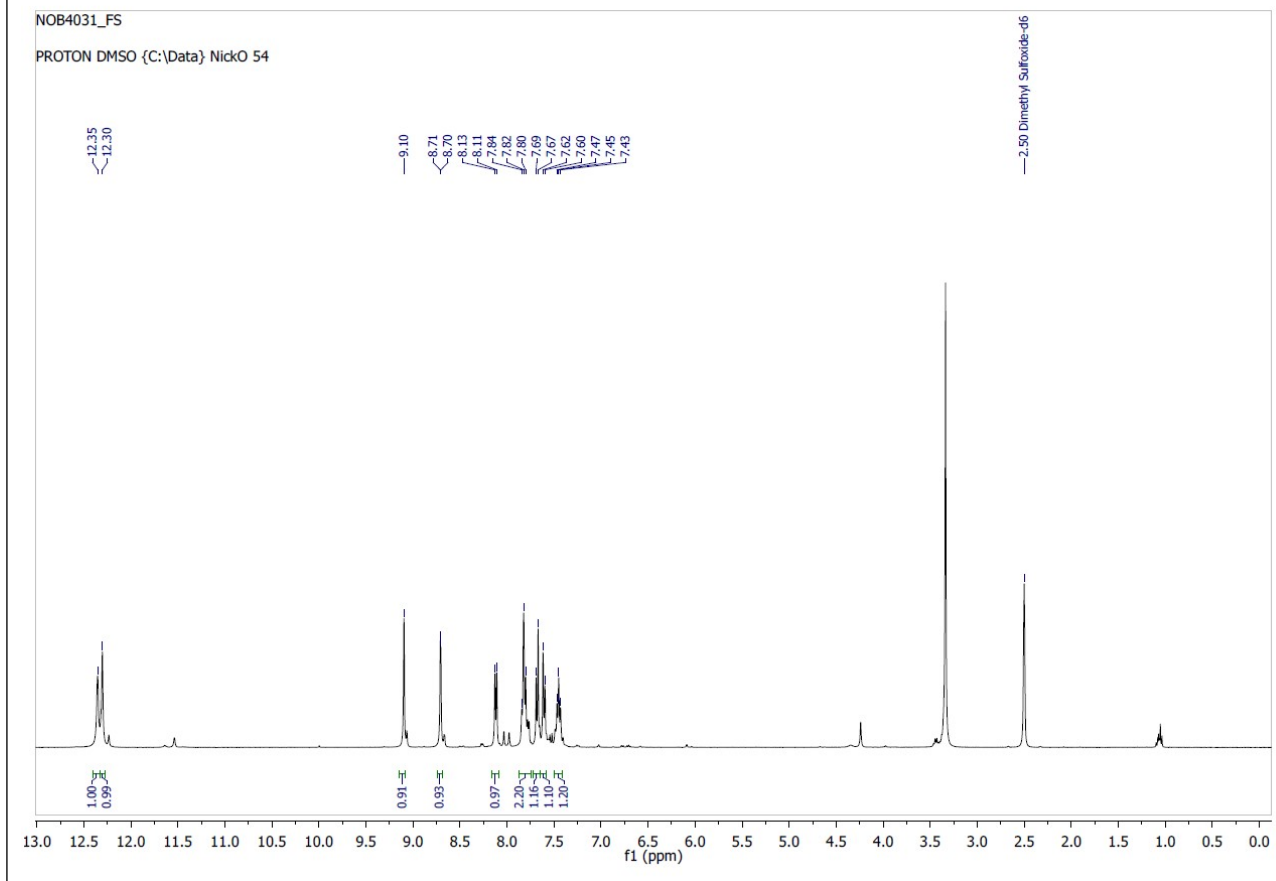

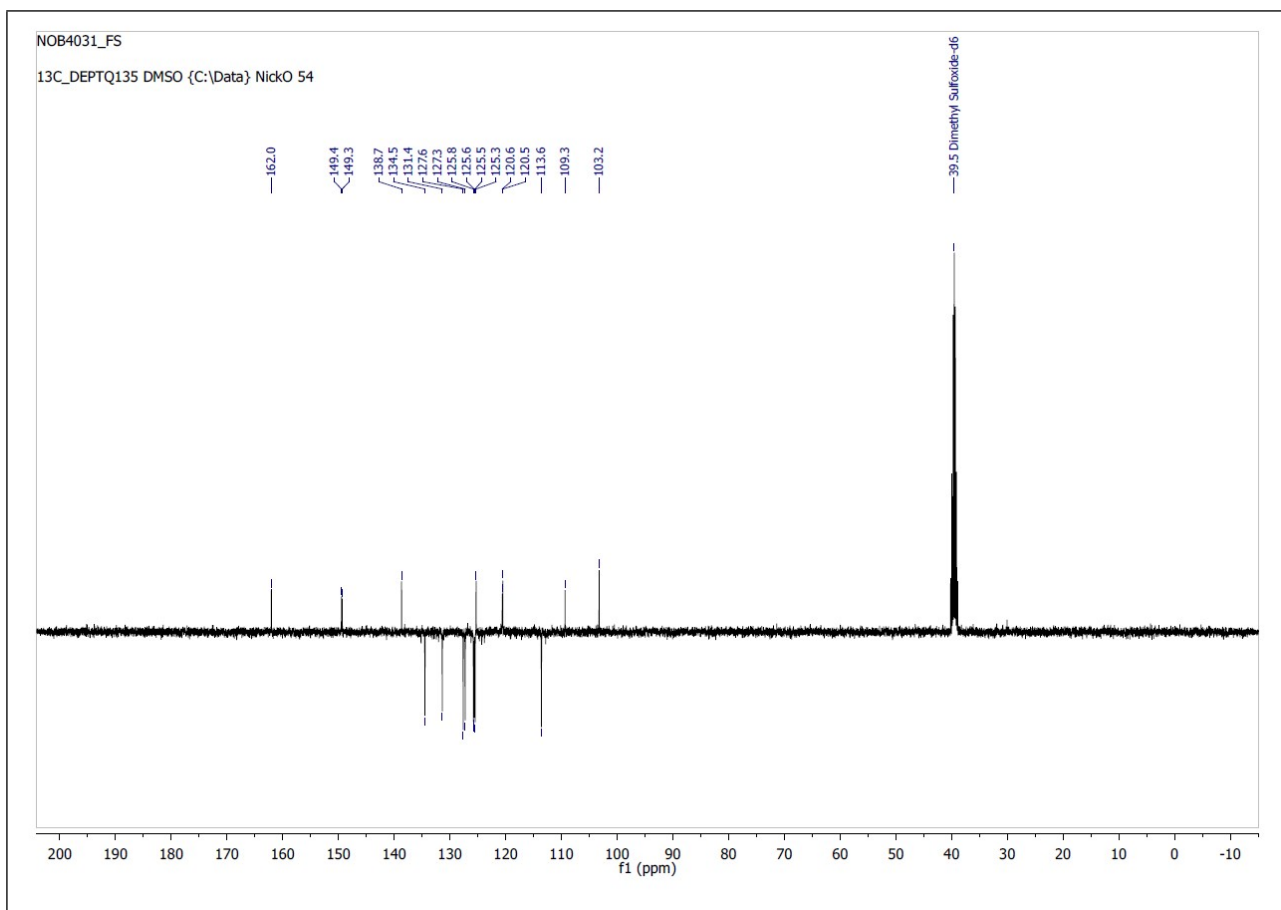

2-(Pyridin-4-yl)quinazolin-4(3H)-one (**49**)

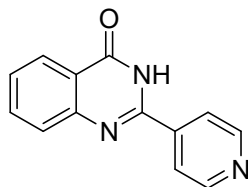

Chemical Formula:  $C_{13}H_9N_3O$

Exact Mass: 223.07

Molecular Weight: 223.23

**IR** (neat):  $\nu_{\max}$  = 2965 (CH), 1674 (C=O)

**$^1H$  NMR** (400 MHz, DMSO- $d_6$ )  $\delta$  12.77 (s, 1H), 8.80 (dd,  $J$  = 4.6, 1.5 Hz, 2H), 8.19 (dd,  $J$  = 7.9, 1.1 Hz, 1H), 8.12 (dd,  $J$  = 4.6, 1.6 Hz, 2H), 7.92 – 7.84 (m, 1H), 7.80 (d,  $J$  = 7.9 Hz, 1H), 7.66 – 7.53 (m, 1H).

**$^{13}C$  NMR** (100 MHz, DMSO- $d_6$ )  $\delta$  162.5, 151.0, 150.7, 148.7, 140.4, 135.3, 128.3, 127.9, 126.4, 122.1, 122.0.

224 (M+H,  $C_{13}H_{10}N_3O$ , 100%);

**LRMS** (ESI-): 222 (M-H,  $C_{13}H_8N_3O$ , 100%)

Mass: 110 mg

m.p. >250 °C

yield: 43 %

pale brown solid



NOB4062\_FS

PROTON DMSO {C:\Data} NickO 33

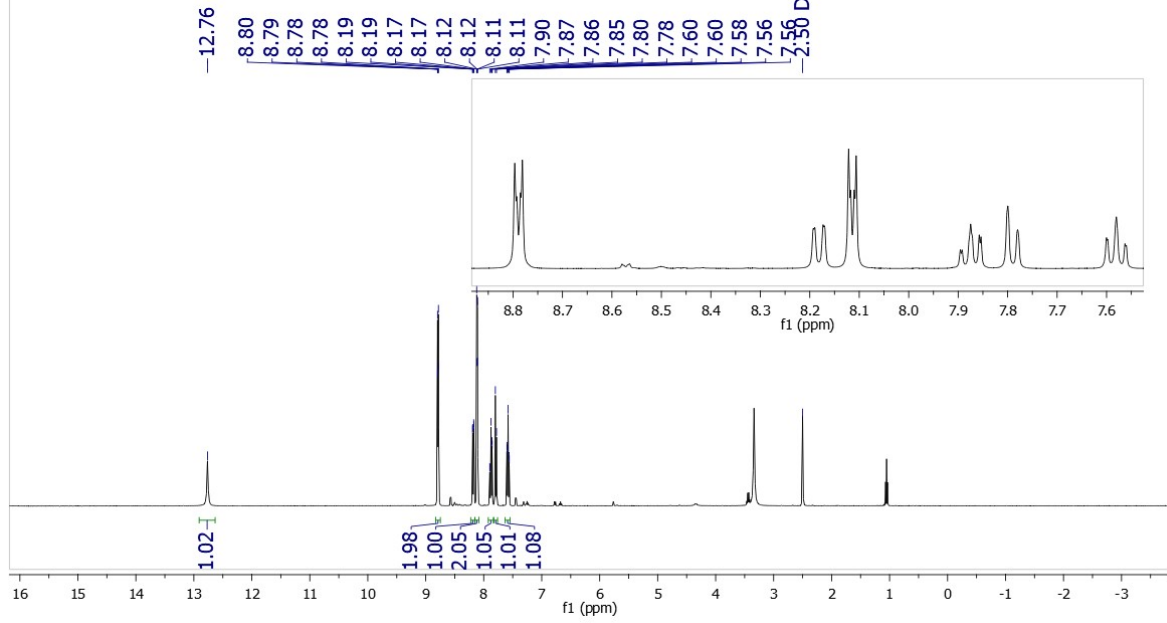

NOB4062\_FS

<sup>13</sup>C DEPTQ135 DMSO {C:\Data} NickO 33

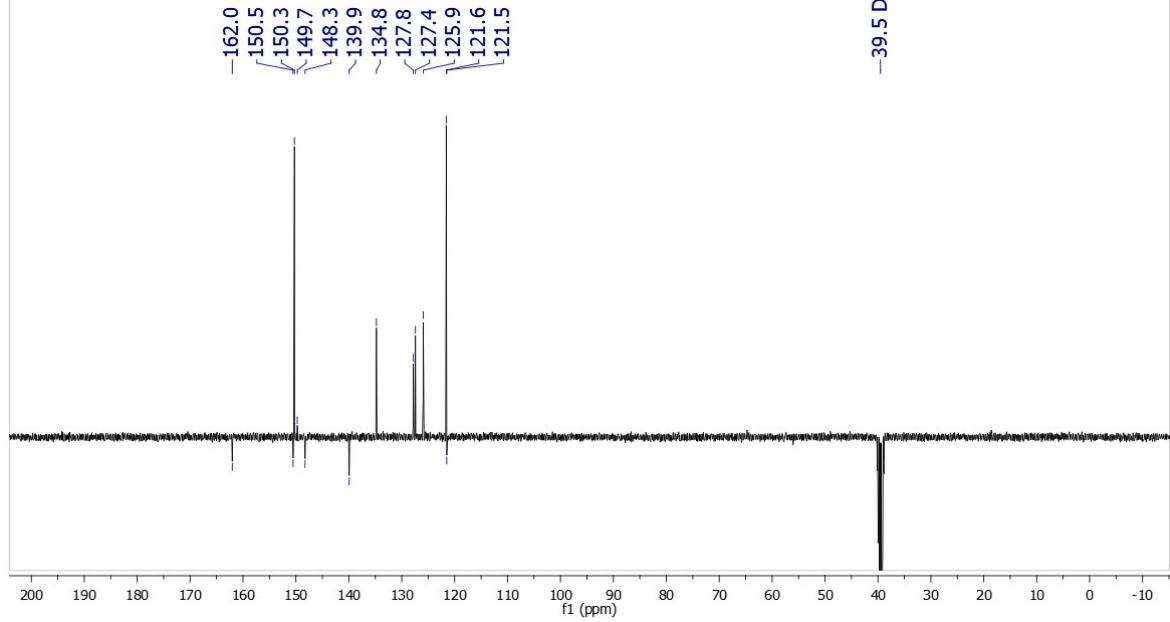

2-(4-methoxystyryl)quinazolin-4(3H)-one (50)

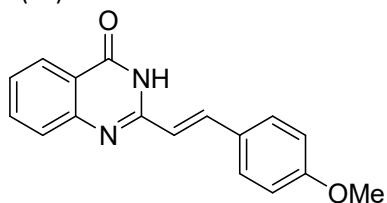

Chemical Formula: C<sub>17</sub>H<sub>14</sub>N<sub>2</sub>O<sub>2</sub>

Exact Mass: 278.11

Molecular Weight: 278.31

IR (neat):  $\nu_{\max}$  = 3100 (NH), 3049, 1668 (C=O) cm<sup>-1</sup>

<sup>1</sup>H NMR (400 MHz, DMSO-d<sub>6</sub>)  $\delta$  12.25 (s, 1H), 8.10 (dd, *J* = 7.9, 1.1 Hz, 1H), 7.91 (d, *J* = 16.1 Hz, 1H), 7.81 – 7.77 (m, 1H), 7.66 – 7.60 (m 3H), 7.47 – 7.43 (m, 1H), 7.02 (d, *J* = 8.7 Hz, 2H), 6.85 (d, *J* = 16.1 Hz, 1H), 3.81 (s, 3H).

<sup>13</sup>C NMR (100 MHz, DMSO-d<sub>6</sub>)  $\delta$  161.8, 160.6, 151.7, 149.2, 138.0, 134.5, 129.3 (2C), 127.6, 127.0, 125.9, 125.8, 121.0, 118.5, 114.6 (2C), 55.3.

LRMS (ESI+) 279.1 (M+H, C<sub>17</sub>H<sub>15</sub>N<sub>2</sub>O<sub>2</sub>, 100%); (ESI-) 277.1 (M-H, C<sub>17</sub>H<sub>13</sub>N<sub>2</sub>O<sub>2</sub>, 100%).

Mass 165 mg

m.p. >210 °C (dec.)

yield 37 %

pale yellow solid

NOB4004\_FS  
PROTON DMSO {C:\Data} NickO 22

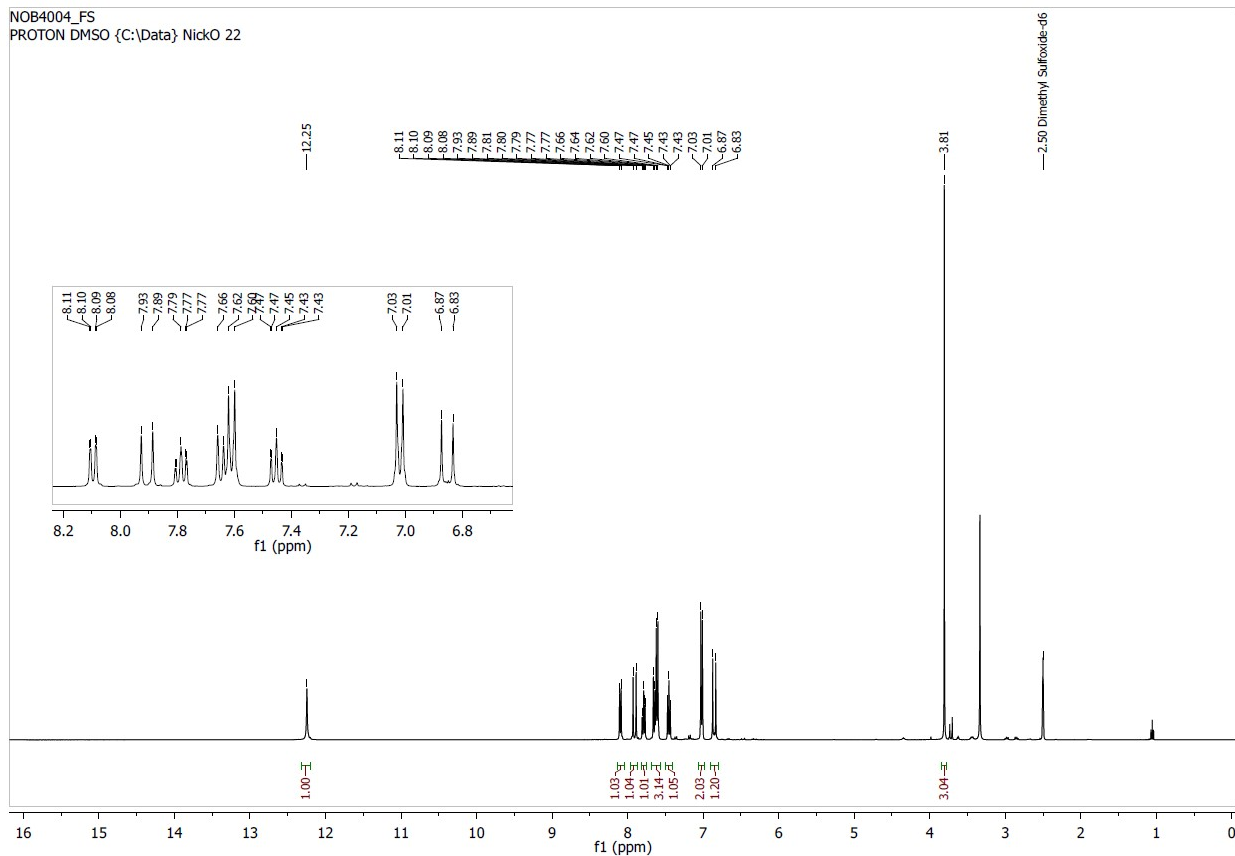

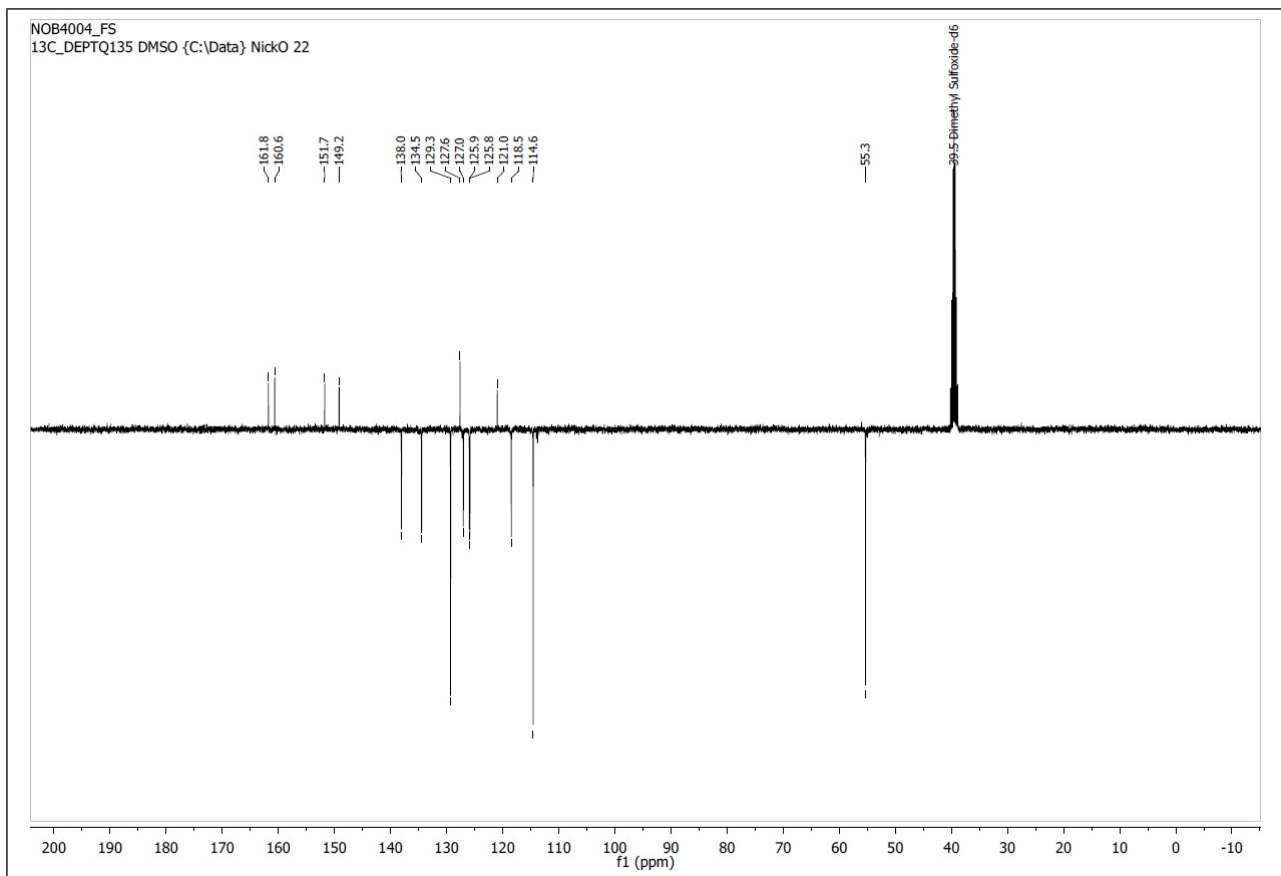

2-styrylquinazolin-4(3H)-one (**51**)

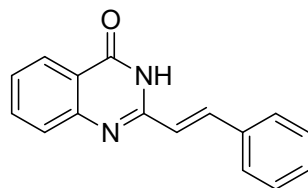

Chemical Formula: C<sub>16</sub>H<sub>12</sub>N<sub>2</sub>O

Exact Mass: 248.09

Molecular Weight: 248.28

**IR** (neat):  $\nu_{\max}$  = 3105 (NH), 3042 (CH), 1668 (C=O) cm<sup>-1</sup>

**<sup>1</sup>H NMR** (400 MHz, DMSO-d<sub>6</sub>)  $\delta$  12.33 (s, 1H), 8.11 (d,  $J$  = 7.4 Hz, 1H), 7.95 (d,  $J$  = 16.2 Hz, 1H), 7.81 (t,  $J$  = 7.1 Hz, 1H), 7.72 – 7.63 (m, 3H), 7.50 – 7.40 (m, 4H), 7.01 (d,  $J$  = 16.2 Hz, 1H).

**<sup>13</sup>C NMR** (100 MHz, DMSO-d<sub>6</sub>)  $\delta$  161.7, 151.4, 149.0, 138.3, 135.0, 134.5, 129.8, 129.1 (2C), 127.6 (2C), 127.1, 126.2, 125.9, 121.1. Quaternary carbon not observed.

**LRMS** (ESI<sup>+</sup>): 249.1 (M+H, C<sub>16</sub>H<sub>13</sub>N<sub>2</sub>O, 100%); **LRMS** (ESI<sup>-</sup>): 247.2 (M-H, C<sub>16</sub>H<sub>11</sub>N<sub>2</sub>O, 100%).

Mass: 248 mg

m.p. 243 – 256 °C

yield 59 %

colour off white solid

NOB4049\_FS

PROTON DMSO {C:\Data} NickO 60

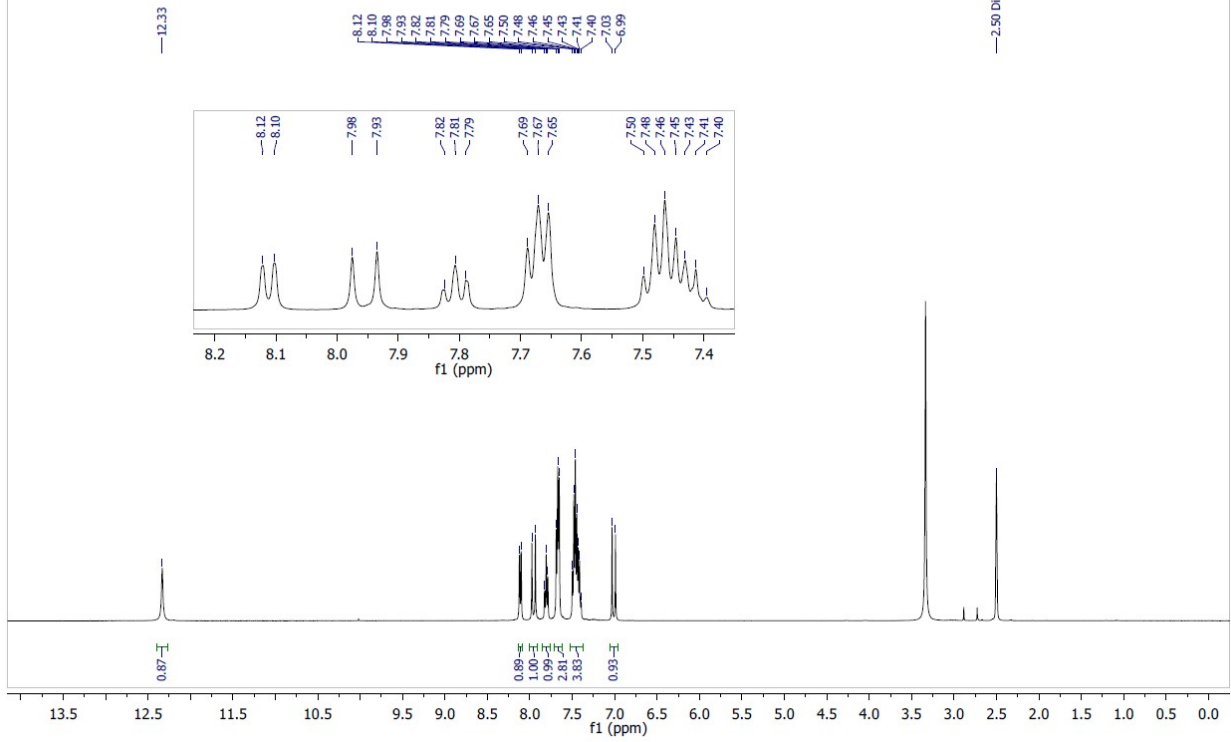

NOB4049\_FS

13C\_DEPTQ135 DMSO {C:\Data} NickO 60

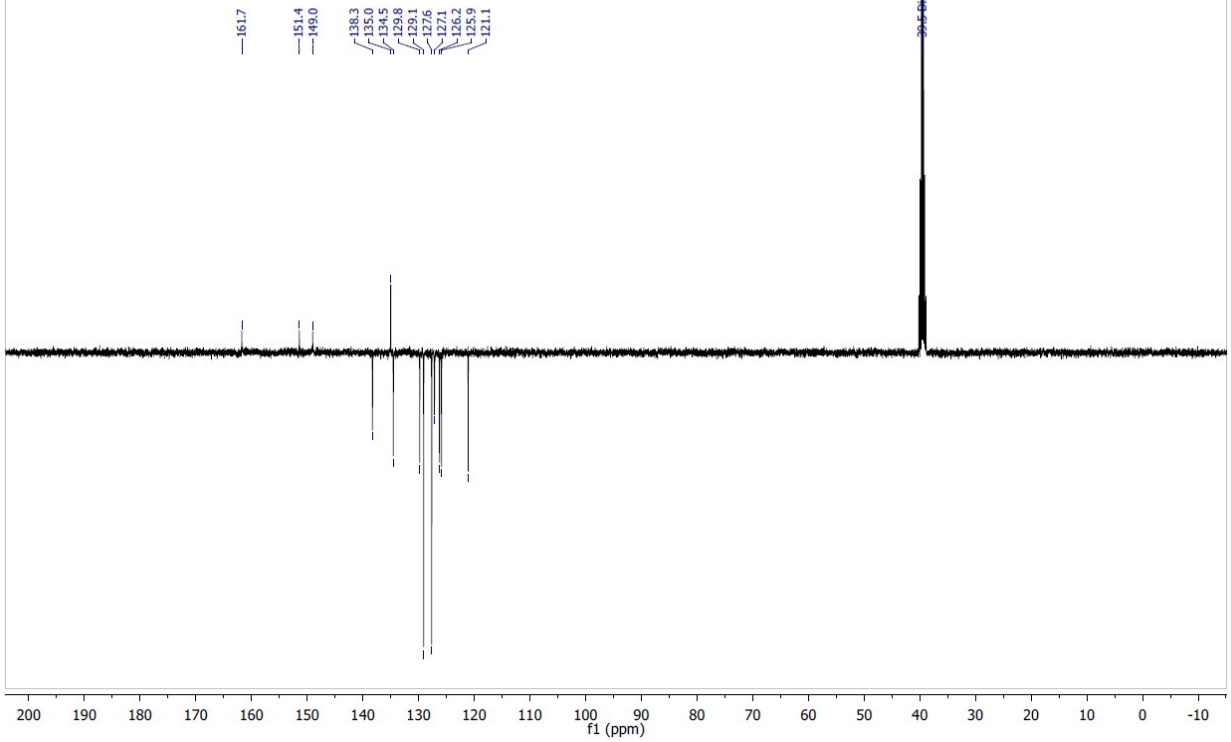

4-(bromostyryl)quinazolin-4(3H)-one (52)

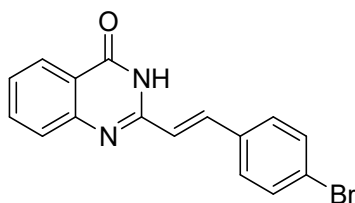

Chemical Formula:  $C_{16}H_{11}BrN_2O$

Exact Mass: 326.01

Molecular Weight: 327.18

IR (neat):  $\nu_{\max} = 3004, 1665$  (C=O),  $770$  (C-Br)  $cm^{-1}$

$^1H$  NMR (400 MHz, DMSO- $d_6$ )  $\delta$  12.34 (s, 1H), 8.12 (dd,  $J = 7.9, 1.0$  Hz, 1H), 7.92 (d,  $J = 16.2$  Hz, 1H), 7.84 – 7.80 (m, 1H), 7.67 (dd,  $J = 8.1, 6.1$  Hz, 3H), 7.62 (d,  $J = 8.6$  Hz, 2H), 7.49 (t,  $J = 7.5$  Hz, 1H), 7.03 (d,  $J = 16.2$  Hz, 1H).

$^{13}C$  NMR (100 MHz, DMSO- $d_6$ )  $\delta$  162.2, 151.7, 149.4, 137.4, 135.0, 134.8, 132.5 (2C), 130.0 (2C), 127.6, 126.8, 126.3, 123.4, 122.4, 121.6. 2D confirms 2C assignment

LRMS (ESI+) 327 (M+H,  $C_{16}H_{12}Br^{79}N_2O$ , 100%) 329 (M+H,  $C_{16}H_{12}Br^{81}N_2O$ , 85%); (ESI-): 325 (M-H,  $C_{16}H_{10}Br^{79}N_2O$ , 100%), 327 (M-H,  $C_{16}H_{10}Br^{81}N_2O$ , 95%)

Mass 81.7 mg

m.p. 296 – 310°C

yield 39 %

colour Off-white solid

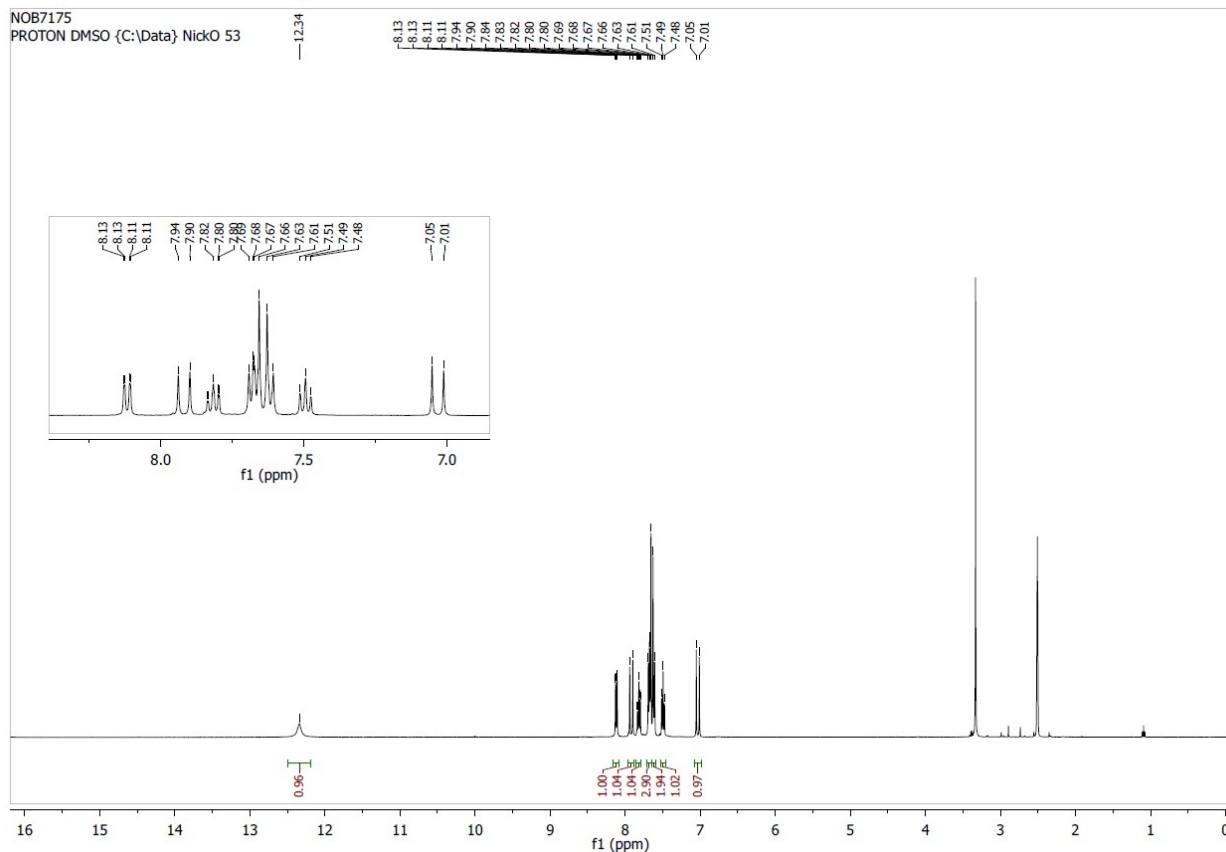

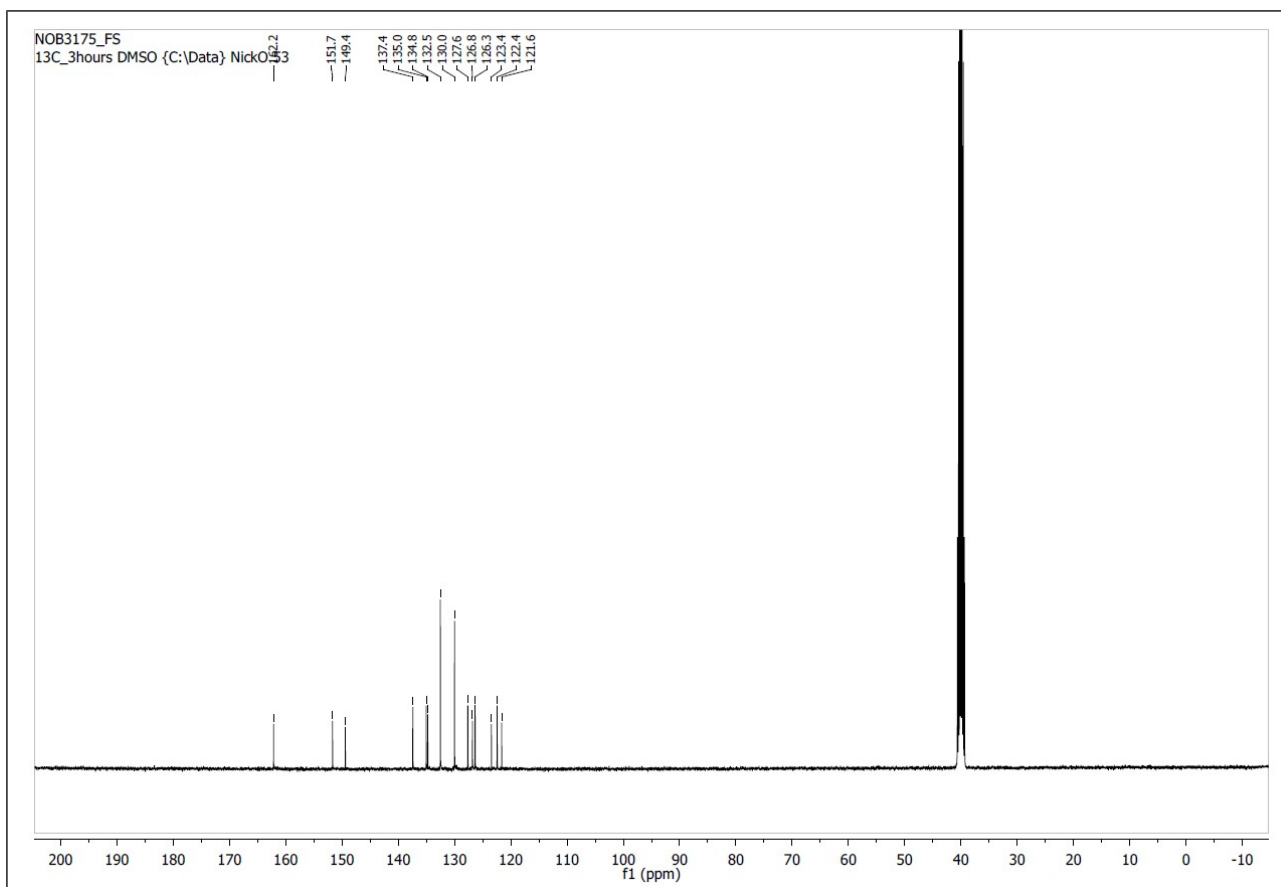

2-(hex-1-en-yl)quinazolin-4(3H)-one (**53**)

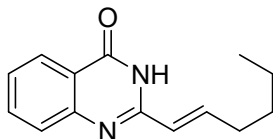

Chemical Formula: C<sub>14</sub>H<sub>16</sub>N<sub>2</sub>O

Exact Mass: 228.13

Molecular Weight: 228.29

**IR** (neat):  $\nu_{\max}$  = 2908 (CH), 1708 (C=O) cm<sup>-1</sup>

**<sup>1</sup>H NMR** (400 MHz, DMSO-d<sub>6</sub>)  $\delta$  8.14 (s, 1H), 7.94-7.88 (m, 2H), 7.64 (s, 1H), 2.85 (s, 1H), 2.64 (s, 1H), 1.79 (s, 1H), 1.36-1.28 (m, 4H), 0.89 (m, 4H).

**<sup>13</sup>C NMR** (100 MHz, DMSO-d<sub>6</sub>)  $\delta$  160.8, 135.9, 128.1, 126.8, 120.4, 32.9, 31.2, 29.6, 28.5, 27.5, 22.3, 22.1, 14.4.

**LRMS** (ESI<sup>+</sup>): 229.1 (M+H, C<sub>14</sub>H<sub>17</sub>N<sub>2</sub>O, 100%); **LRMS** (ESI<sup>-</sup>): 227.1 (M-H, C<sub>14</sub>H<sub>15</sub>N<sub>2</sub>O, 100%).

Mass 109 mg

m.p. 148 - 151 °C

yield 28 %

white solid

NOB4043\_FS

PROTON DMSO (C:\Data) NickO 19

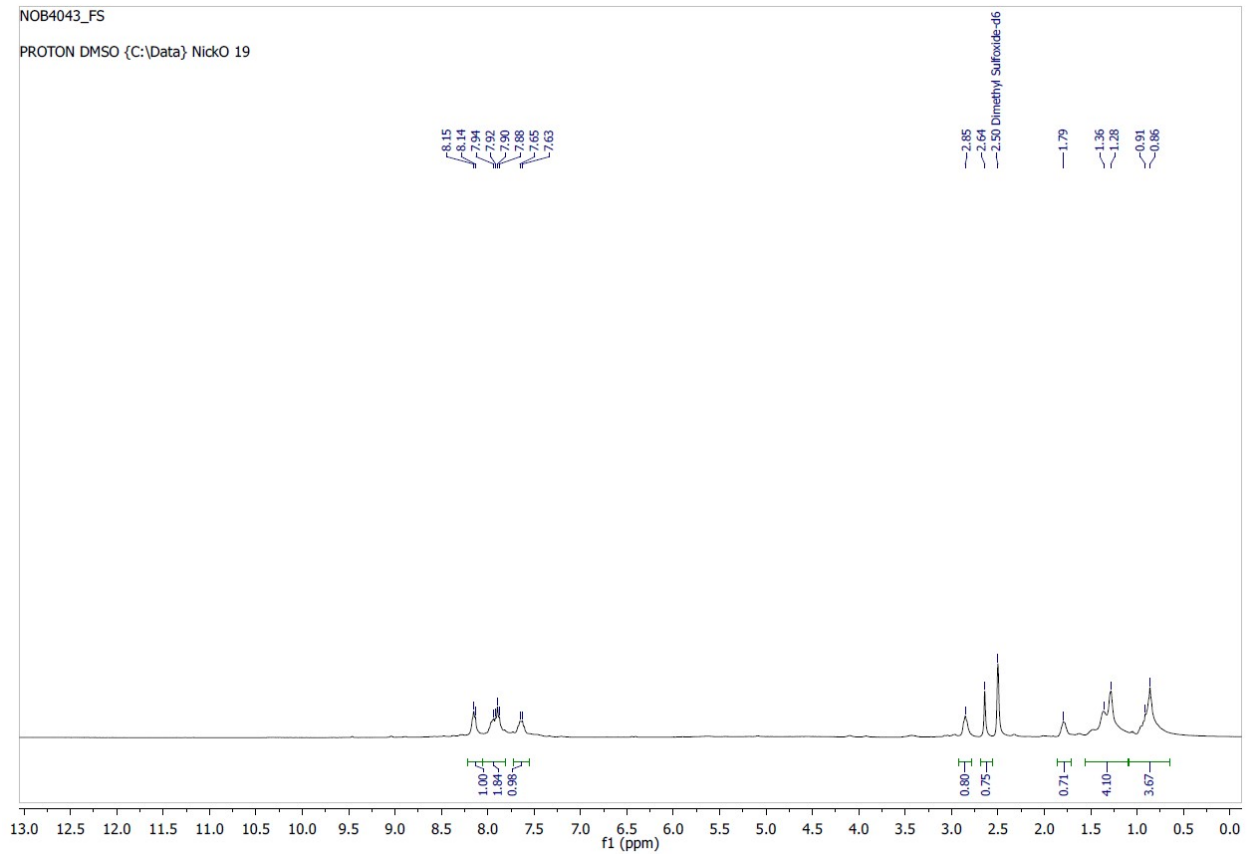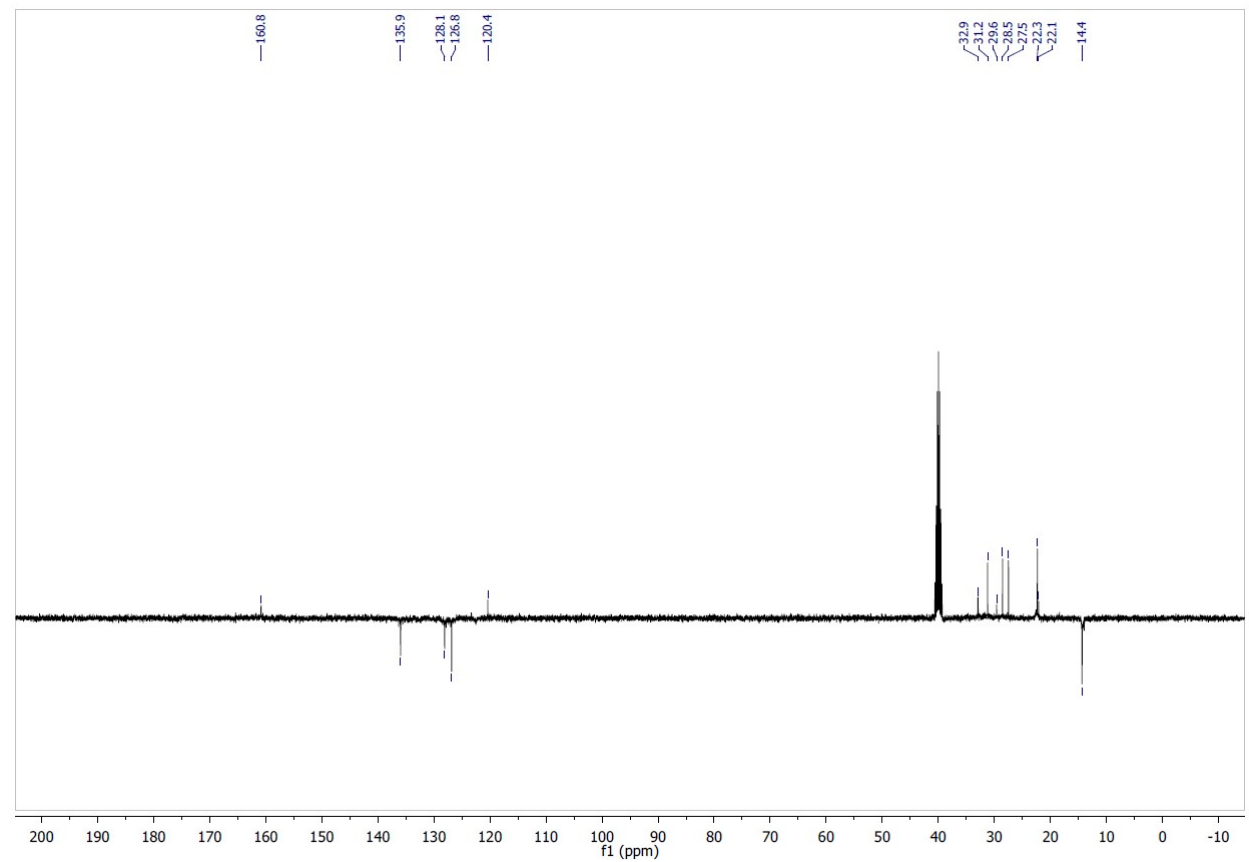

2-phenylquinazolin-4(3H)-one (54)

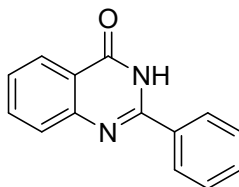

Chemical Formula: C<sub>14</sub>H<sub>10</sub>N<sub>2</sub>O

Exact Mass: 222.08

Molecular Weight: 222.24

IR (neat):  $\nu_{\max}$  = 3060 (N-H stretch), 1661 (C=O), 766.5 (C=C) cm<sup>-1</sup>

<sup>1</sup>H NMR (400 MHz, CDCl<sub>3</sub>)  $\delta$  8.34 (dd,  $J$  = 7.9, 0.9 Hz, 1H), 8.27 (m, 2H), 7.87 – 7.77 (m, 2H), 7.64 – 7.55 (m, 3H), 7.51 (dt, 1H). NH proton not observed.

<sup>13</sup>C NMR (100 MHz, CDCl<sub>3</sub>)  $\delta$  164.0, 151.9, 149.7, 135.0, 133.0, 131.8, 129.2 (2C), 128.2, 127.6 (2C), 126.9, 126.5, 121.0.

LRMS (ESI+): 223.2 (M+H, C<sub>14</sub>H<sub>11</sub>N<sub>2</sub>O, 100%); (ESI-): 221.1 (M-H, C<sub>14</sub>H<sub>9</sub>N<sub>2</sub>O, 100%).

Mass 115.5 mg

m.p. >223 °C (dec.)

yield 81 %

white crystals

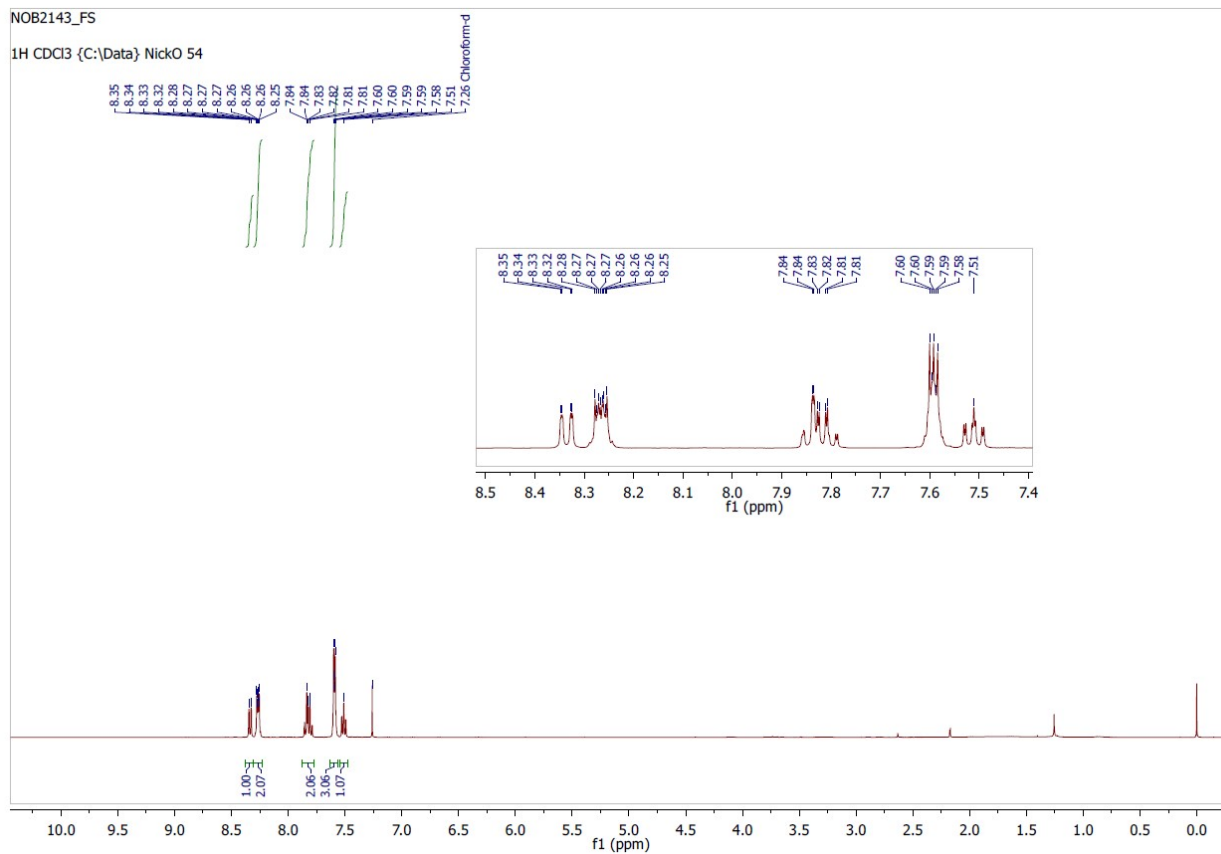



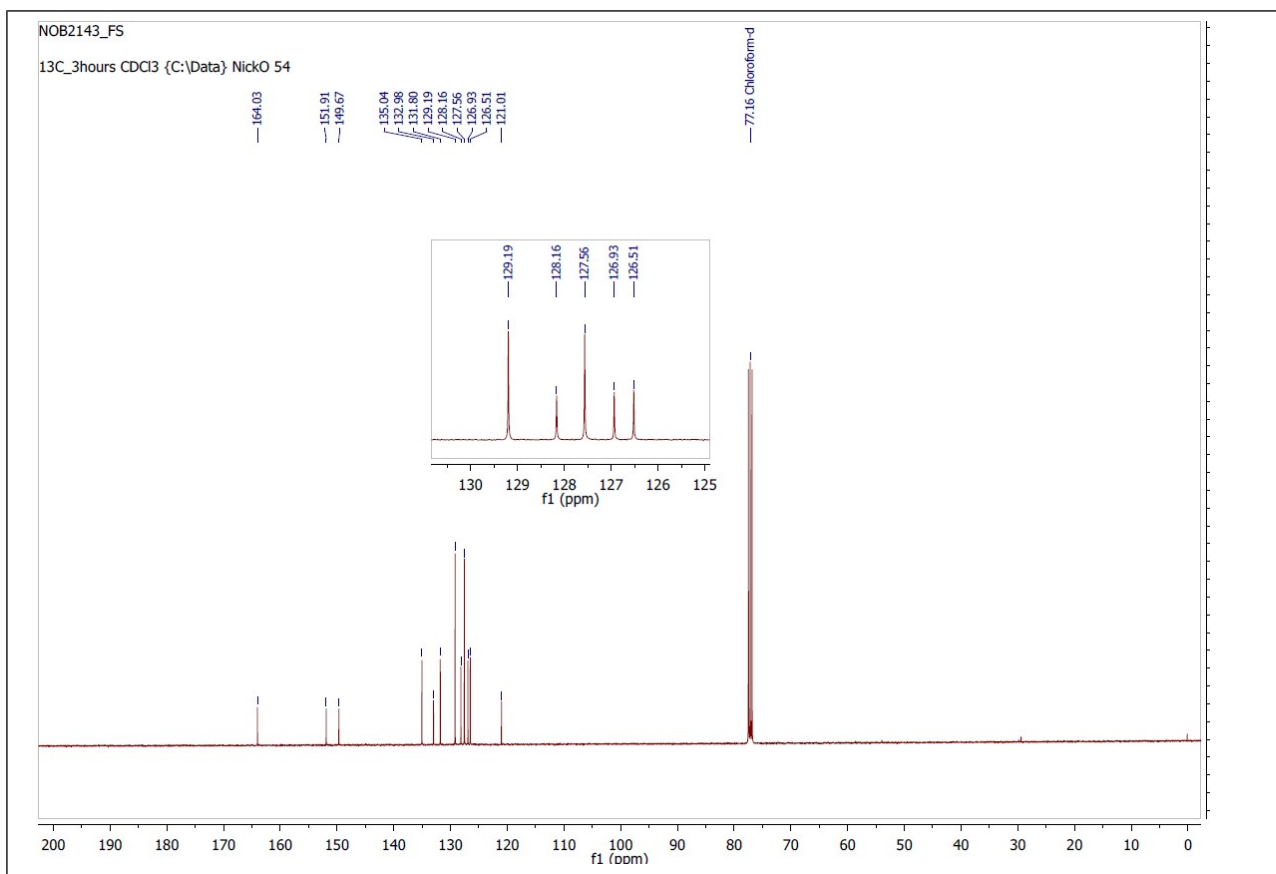

2-(2-bromophenyl)quinazolin-4(1H)-one (**55**)

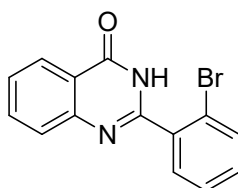

Chemical Formula:  $C_{14}H_9BrN_2O$

Exact Mass: 299.99

Molecular Weight: 301.14

**IR** (neat):  $\nu_{max}$  = 3282 (NH), 3159 (NNH), 1666 (C=O)  $cm^{-1}$

**$^1H$  NMR** (400 MHz, DMSO- $d_6$ )  $\delta$  8.27 (s, 1H), 8.17 (dd,  $J$  = 8.0, 1.1 Hz, 1H), 7.89 – 7.82 (m, 1H), 7.76 (dd,  $J$  = 7.9, 1.1 Hz, 1H), 7.70 (dd,  $J$  = 8.1, 0.5 Hz, 1H), 7.65 – 7.45 (m, 3H).

**$^{13}C$  NMR** (100 MHz, DMSO- $d_6$ )  $\delta$  162.0, 153.9, 148.9, 136.3, 135.1, 133.1, 132.2, 131.2, 128.2, 127.9, 127.6, 126.3, 121.6, 121.4.

**LRMS** (ESI +)  $m/z$ : 301 (M+H,  $C_{14}H_{10}^{79}BrN_2O$ , 100%), 303 (M+H,  $C_{14}H_{10}^{81}BrN_2O$ , 95%); (ESI-)  $m/z$ : 199 (M-H,  $C_{14}H_8^{79}BrN_2O$ , 100%), 301 (M-H,  $C_{14}H_8^{81}BrN_2O$ , 95%).

Mass 93 mg

m.p. >165 °C (dec.)

yield 65 %

white crystals



2-(4-bromophenyl)quinazolin-4(1H)-one (56)

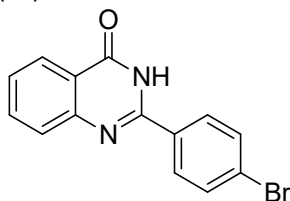

Chemical Formula:  $C_{14}H_9BrN_2O$

Exact Mass: 299.99

Molecular Weight: 301.14

IR (neat):  $\nu_{\max} = 2928$  (CH), 1670 (C=O)  $cm^{-1}$

$^1H$  NMR (400 MHz, DMSO- $d_6$ )  $\delta$  8.19 – 8.10 (m, 3H), 7.85-7.83 (m, 1H), 7.78-7.74 (m, 3H), 7.58 – 7.50 (m, 1H).

$^{13}C$  NMR (100 MHz, DMSO- $d_6$ )  $\delta$  162.1, 151.5, 148.6, 134.7, 131.9, 131.6 (2C), 129.8 (2C), 127.5, 126.9, 125.8, 125.3, 121.0.

LRMS (ESI+): 301 (M+H,  $C_{14}H_9^{79}BrN_2O$ , 100%), 303.1 (M+H,  $C_{14}H_9^{81}BrN_2O$ , 100%); (ESI-): 299 (M-H,  $C_{14}H_8^{79}BrN_2O$ , 95%), 301 (M-H,  $C_{14}H_8^{81}BrN_2O$ , 95%).

Mass 147 mg

m.p. >300 °C

yield 84 %

white crystals

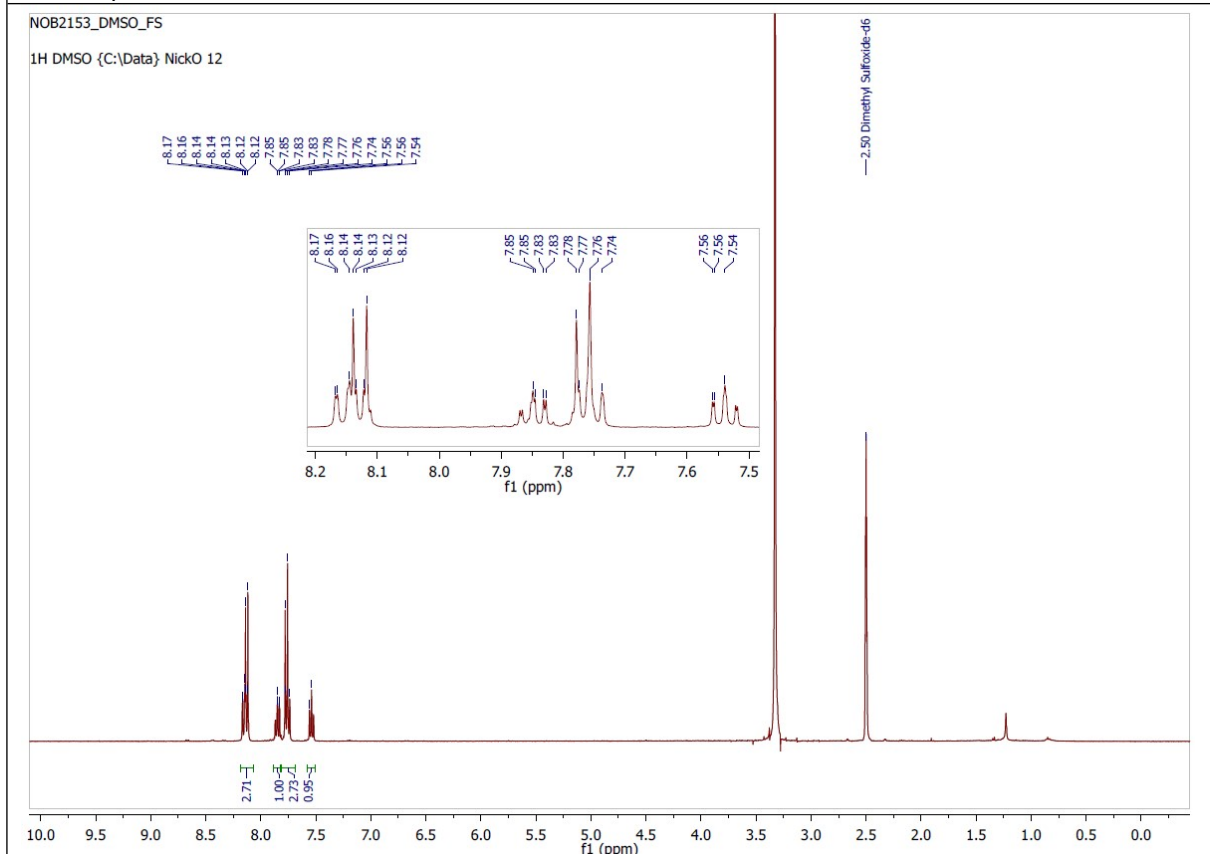

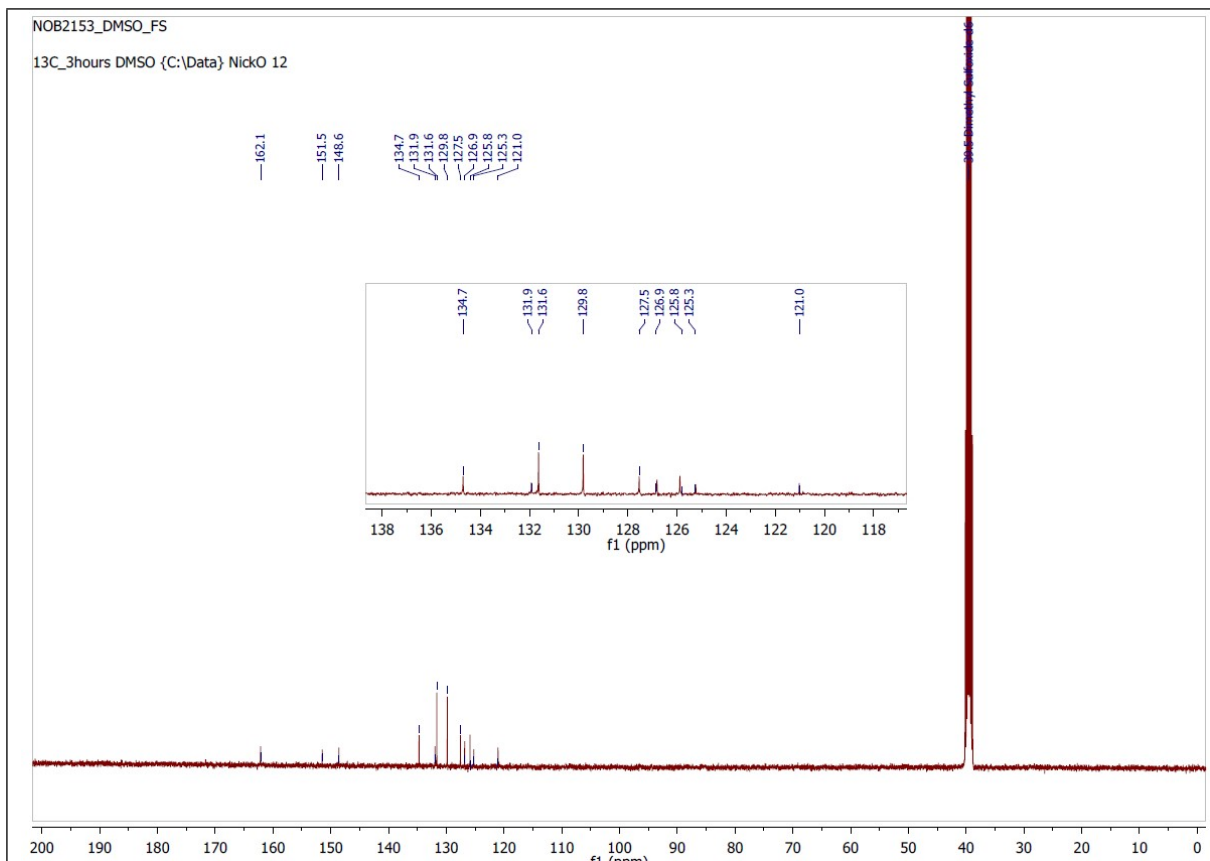

2-(3-hydroxyphenyl)quinazolin-4(3H)-one (**57**)

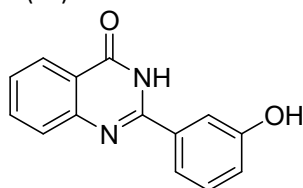

Chemical Formula:  $C_{14}H_{10}N_2O_2$

Exact Mass: 238.07

Molecular Weight: 238.24

**IR** (neat):  $\nu_{\max}$  = 3228 (OH) 1657 (C=O)  $cm^{-1}$

**$^1H$  NMR** (400 MHz, DMSO- $d_6$ )  $\delta$  12.43 (s, 1H), 9.79 (s, 1H), 8.15 (d,  $J$  = 7.7 Hz, 1H), 7.84 (t,  $J$  = 7.3 Hz, 1H), 7.73 (d,  $J$  = 8.1 Hz, 1H), 7.60 (m, 2H), 7.52 (t,  $J$  = 7.4 Hz, 1H), 7.34 (t,  $J$  = 8.1 Hz, 1H), 6.99 (d,  $J$  = 7.3 Hz, 1H).

**$^{13}C$  NMR** (100 MHz, DMSO- $d_6$ )  $\delta$  157.97, 135.05, 134.50, 130.14, 127.91, 126.99, 126.32, 121.44, 118.98, 118.82, 115.03.

**LRMS** (ESI-): 237.1 (M-H,  $C_{14}H_{10}N_2O_2$ , 100%).

Mass 225 mg

m.p. >250 °C

yield 71 %

white solid

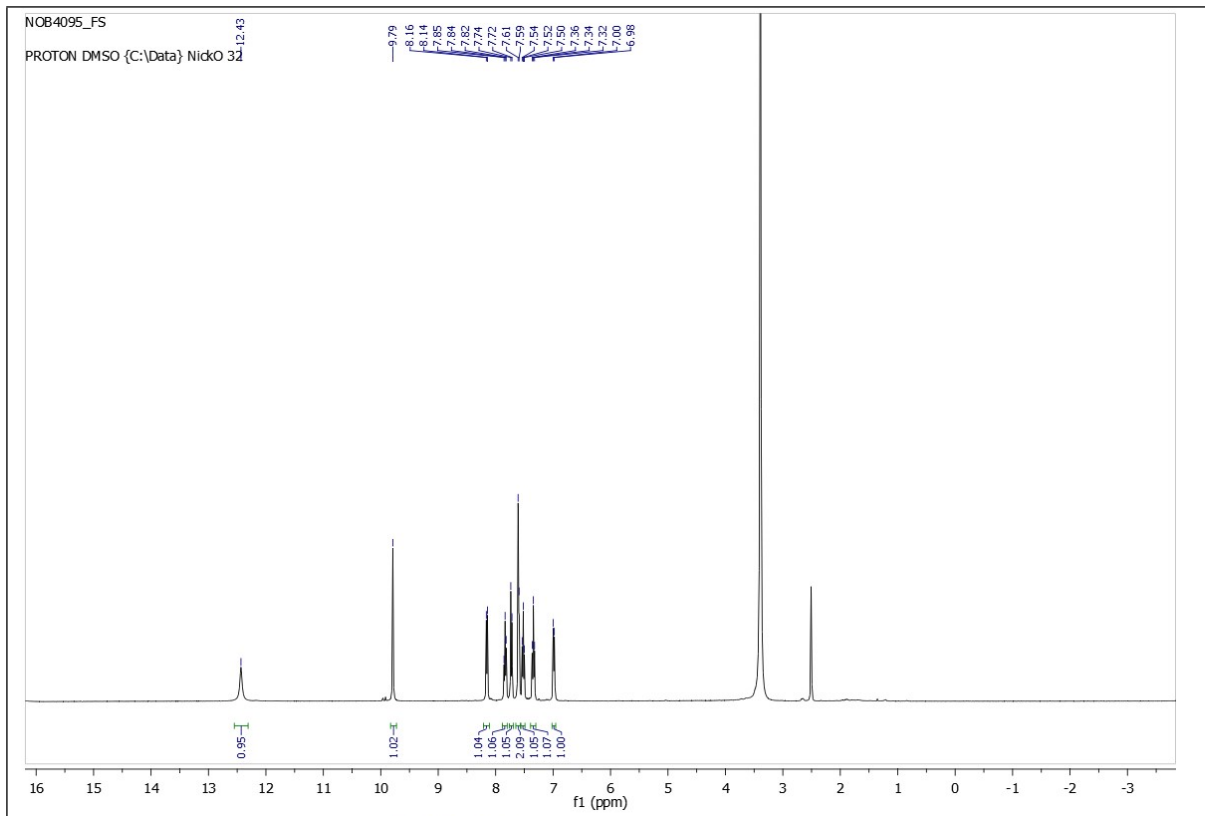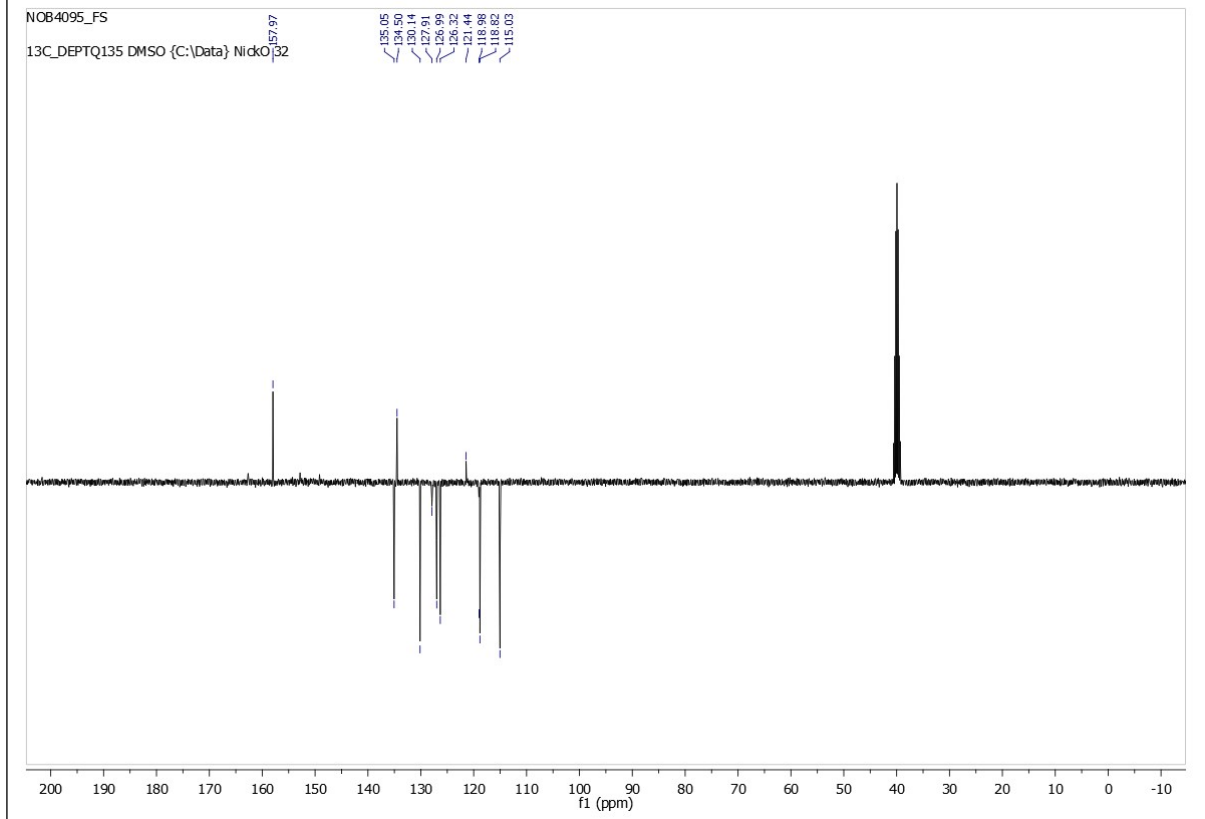

methyl 3-(2-(4-oxo-3,4-dihydroquinazolin-2-yl)vinyl)benzoate (**60**)

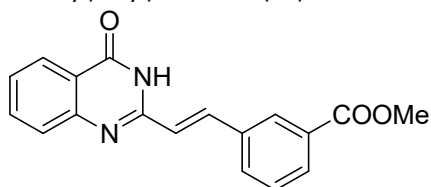

Chemical Formula: C<sub>18</sub>H<sub>14</sub>N<sub>2</sub>O<sub>3</sub>

Exact Mass: 306.10

Molecular Weight: 306.32

IR (neat):  $\nu_{\max}$  = 2990 (CH), 1725 (C=O) cm<sup>-1</sup>

<sup>1</sup>H NMR (400 MHz, DMSO-d<sub>6</sub>)  $\delta$  12.33 (s, 1H), 8.22 (s, 1H), 8.15 – 8.07 (m, 1H), 8.04 – 7.95 (m, 3H), 7.86 – 7.78 (m, 1H), 7.69 (d, J = 8.0 Hz, 1H), 7.64 – 7.58 (m, 2H), 7.52 – 7.47 (m, 1H), 7.12 (d, J = 16.2 Hz, 1H), 3.90 (s, 3H).

<sup>13</sup>C NMR (101 MHz, DMSO-d<sub>6</sub>)  $\delta$  165.9, 137.1, 135.6, 134.6, 132.4, 130.5, 130.1, 129.7, 127.8, 126.5, 125.9, 122.4, 121.2, 52.4, 39.5.

LRMS (ESI+): 307.1 (M+H, C<sub>18</sub>H<sub>15</sub>N<sub>2</sub>O<sub>3</sub>, 100%), (ESI-): 305.1 (M-H, C<sub>18</sub>H<sub>13</sub>N<sub>2</sub>O<sub>3</sub>, 100%),

Mass 88 mg

m.p. >183 °C (dec.)

yield 31 %

yellow solid

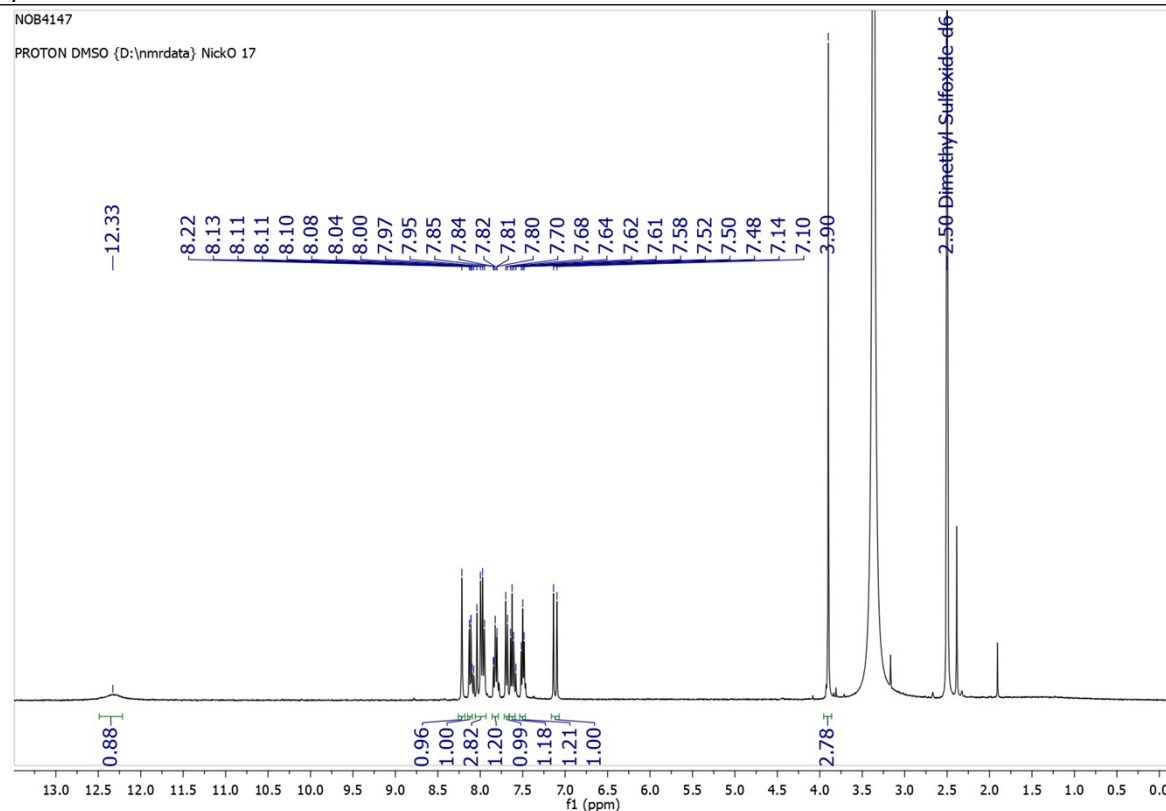

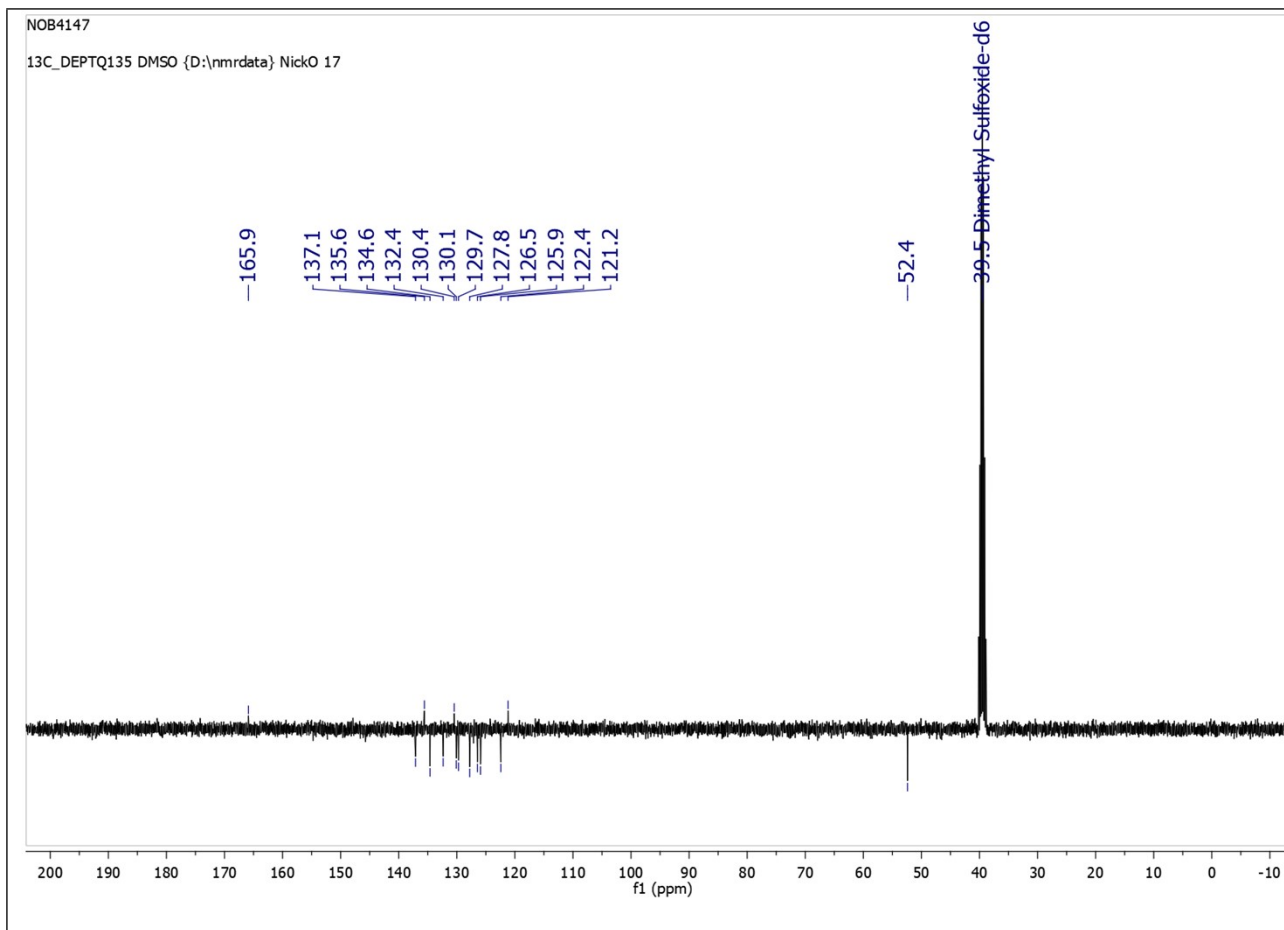

2-(4-methylstyryl)quinazolin-4(3H)-one (**61**)

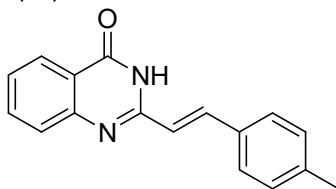

Chemical Formula:  $C_{17}H_{14}N_2O$

Exact Mass: 262.11

Molecular Weight: 262.31

**IR** (neat):  $\nu_{\max}$  3049 (CH), 1674 (C=O)  $cm^{-1}$

**$^1H$  NMR** (400 MHz, DMSO- $d_6$ )  $\delta$  12.29 (s, 1H), 8.11 (dd,  $J = 7.9, 1.3$  Hz, 1H), 7.92 (d,  $J = 16.2$  Hz, 1H), 7.85 – 7.78 (m, 1H), 7.67 (d,  $J = 7.9$  Hz, 1H), 7.56 (d,  $J = 8.1$  Hz, 2H), 7.51 – 7.44 (m, 1H), 7.28 (d,  $J = 8.0$  Hz, 2H), 6.95 (d,  $J = 16.2$  Hz, 1H), 2.35 (s, 3H).

**$^{13}C$  NMR** (100 MHz, DMSO- $d_6$ )  $\delta$  140.15, 138.76, 134.98, 132.72, 130.15, 128.09, 127.54, 126.59, 126.32, 121.49, 120.43, 21.47.

**LRMS** (ESI+): 263.1 (M+H,  $C_{17}H_{15}N_2O$ , 100%); LRMS (ESI-): 261.1 (M-H,  $C_{17}H_{13}N_2O$ , 100%).

Mass: 49.8 mg

m.p. >250 °C

yield 20 %

white solid

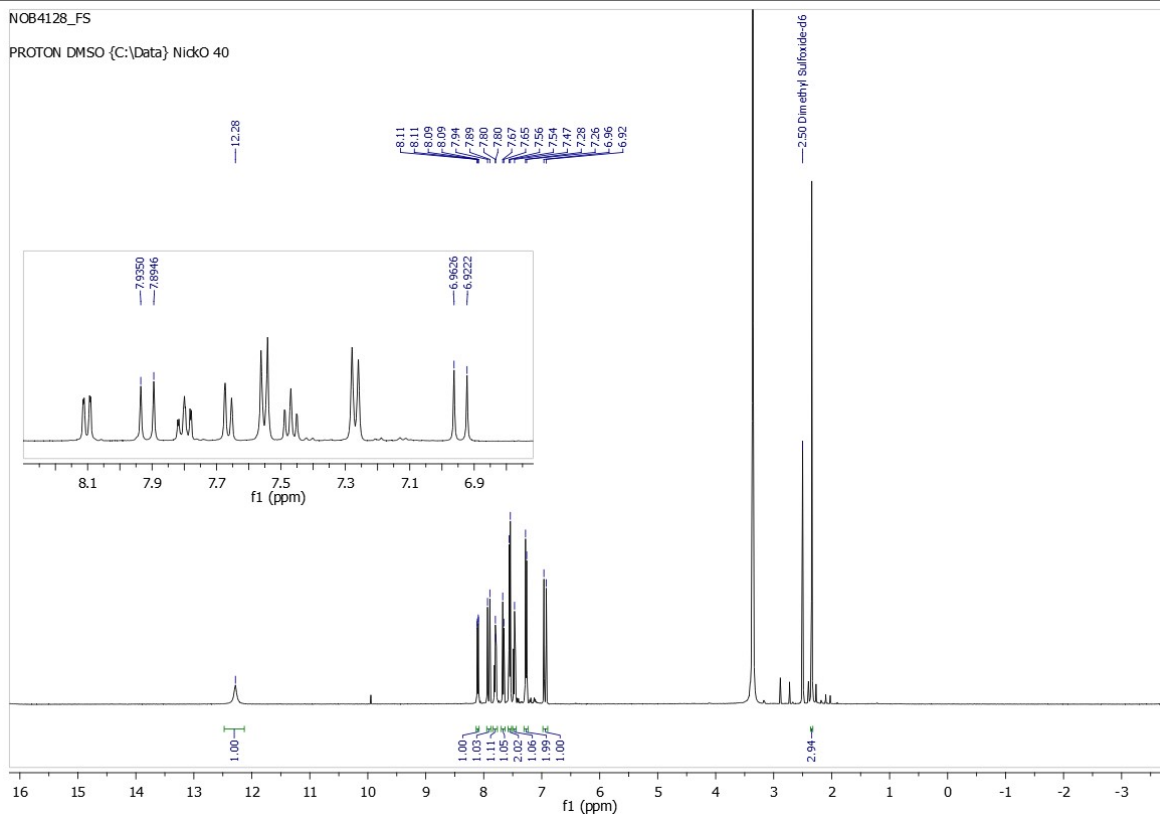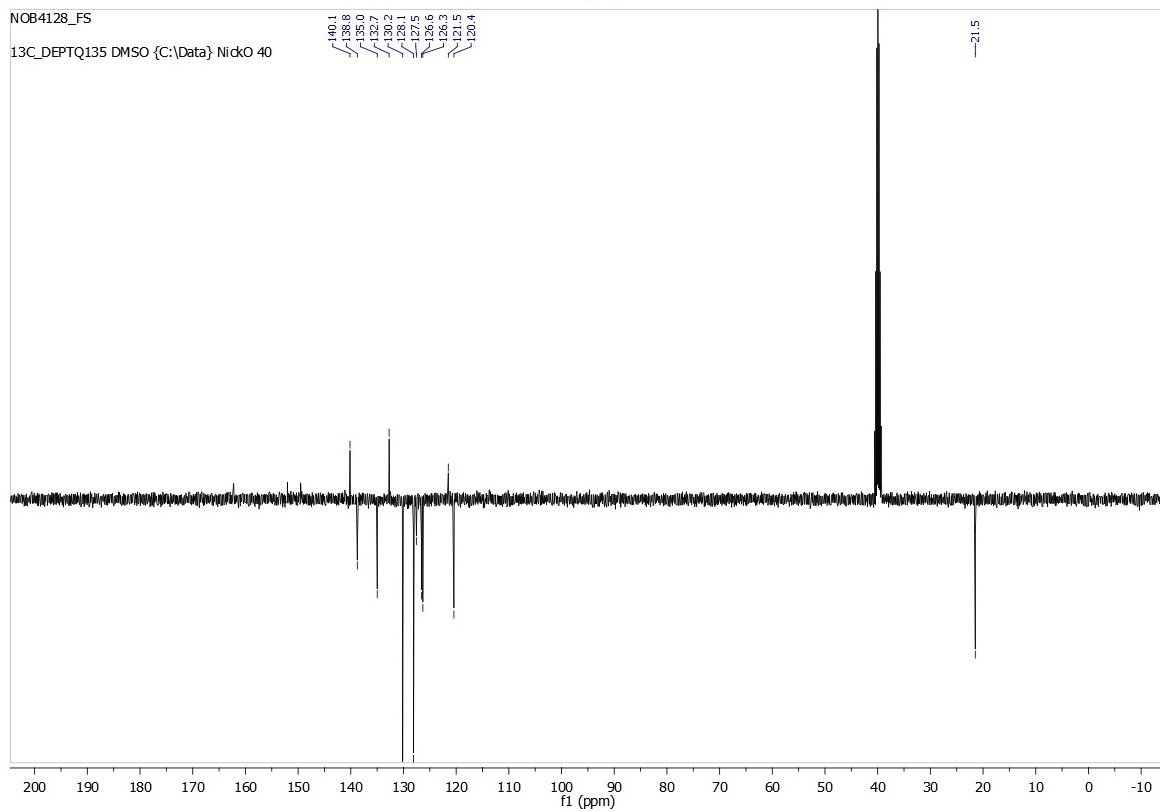



2-(3-hydroxystyryl)quinazolin-4(3H)-one (**62**)

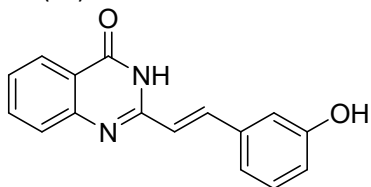

Chemical Formula: C<sub>16</sub>H<sub>12</sub>N<sub>2</sub>O<sub>2</sub>

Exact Mass: 264.09

Molecular Weight: 264.28

IR (neat):  $\nu_{\max}$  = 3053 (OH), 1680 (C=O) cm<sup>-1</sup>

<sup>1</sup>H NMR (400 MHz, DMSO-d<sub>6</sub>)  $\delta$  12.32 (s, 1H), 9.67 (s, 1H), 8.11 (dd, *J* = 7.9, 1.0 Hz, 1H), 7.87 (d, *J* = 16.1 Hz, 1H), 7.84 – 7.78 (m, 1H), 7.68 (d, *J* = 8.0 Hz, 1H), 7.48 (t, *J* = 7.1 Hz, 1H), 7.26 (t, *J* = 7.8 Hz, 1H), 7.09 (d, *J* = 7.7 Hz, 1H), 7.03 (s, 1H), 6.92 (d, *J* = 16.1 Hz, 1H), 6.83 (dd, *J* = 8.0, 1.8 Hz, 1H).

<sup>13</sup>C NMR (100 MHz, DMSO-d<sub>6</sub>)  $\delta$  162.20, 158.25, 151.86, 149.48, 138.95, 136.71, 134.98, 130.55, 127.60, 126.66, 126.32, 121.56, 121.24, 119.32, 117.53, 114.21.

LRMS (ESI<sup>+</sup>): 265.1 (M+H, C<sub>16</sub>H<sub>13</sub>N<sub>2</sub>O<sub>2</sub>, 100%); LRMS (ESI<sup>-</sup>): 263.1 (M-H, C<sub>16</sub>H<sub>11</sub>N<sub>2</sub>O<sub>2</sub>, 100%).

Mass 67.1 mg

m.p. >250 °C

yield 28 %; brown solid

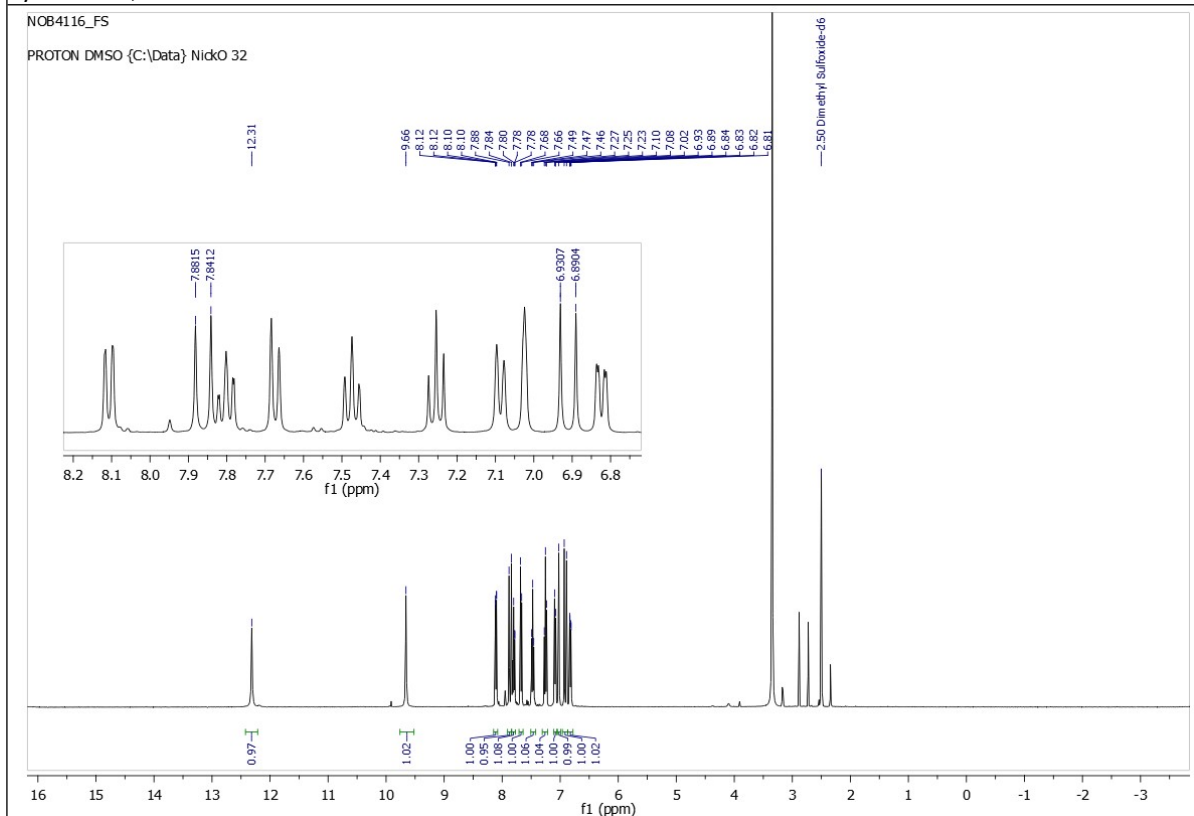

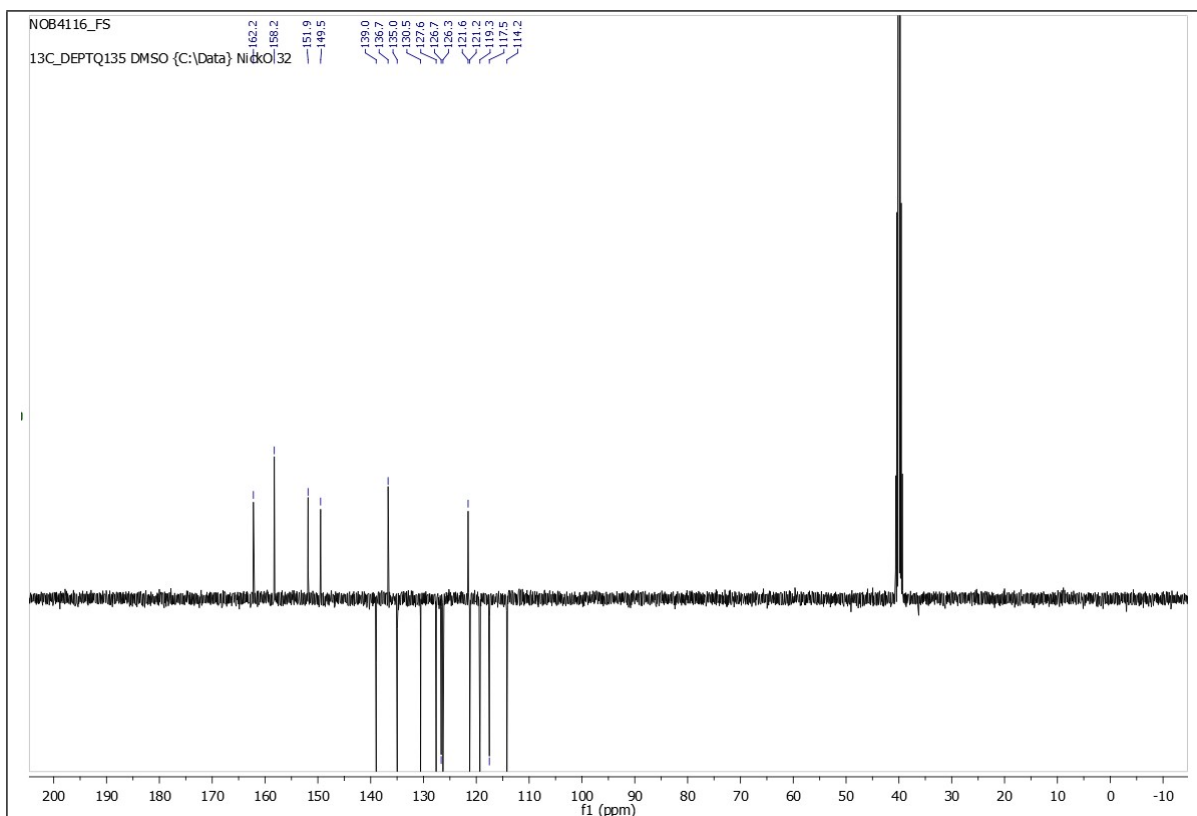

2-(4-hydroxystyryl)quinazolin-4(3H)-one (**63**)

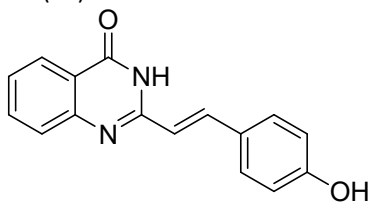

Chemical Formula:  $C_{16}H_{12}N_2O_2$

Exact Mass: 264.09

Molecular Weight: 264.28

**IR** (neat):  $\nu_{\max} = 3064$  (OH),  $1674$  (C=O)  $cm^{-1}$

**$^1H$  NMR** (400 MHz, DMSO- $d_6$ )  $\delta$  12.22 (s, 1H), 9.99 (s, 1H), 8.09 (dd,  $J = 7.9, 1.2$  Hz, 1H), 7.87 (d,  $J = 16.1$  Hz, 1H), 7.83 – 7.73 (m, 1H), 7.64 (d,  $J = 7.8$  Hz, 1H), 7.51 (d,  $J = 8.6$  Hz, 2H), 7.45 (ddd,  $J = 8.1, 7.2, 1.1$  Hz, 1H), 6.85 (dd,  $J = 9.1, 2.2$  Hz, 2H), 6.78 (d,  $J = 16.1$  Hz, 1H).

**$^{13}C$  NMR** (100 MHz, DMSO- $d_6$ )  $\delta$  162.27, 159.74, 152.36, 149.67, 138.99, 134.93, 129.95, 127.41, 126.52, 126.30, 121.34, 117.77, 116.41.

**LRMS** (ESI+): 265.1 (M+H,  $C_{16}H_{13}N_2O_2$ , 100%); LRMS (ESI-): 263.1 (M-H,  $C_{16}H_{11}N_2O_2$ , 100%).

Mass 92.9 mg

m.p. >250 °C

yield 43 %

white solid

NOB4112\_FS

1H DMSO {C:\Data} NickO 8

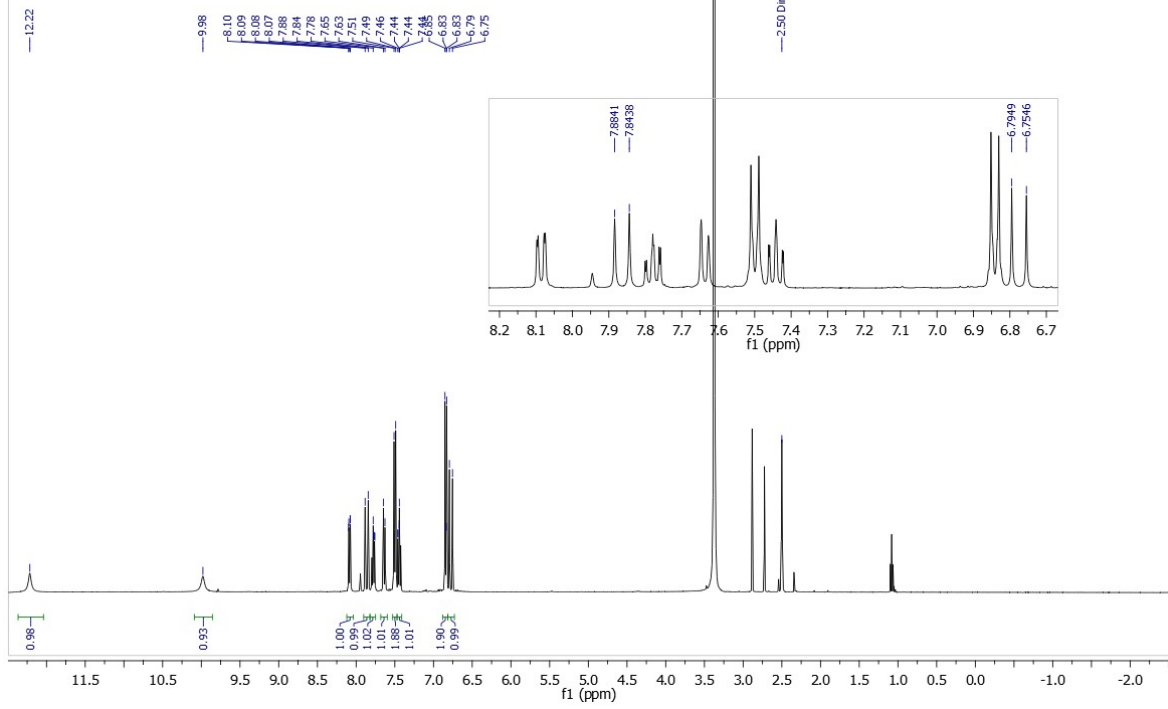

NOB4112\_FS

13C DEPTQ135 DMSO {C:\Data} NickO 8

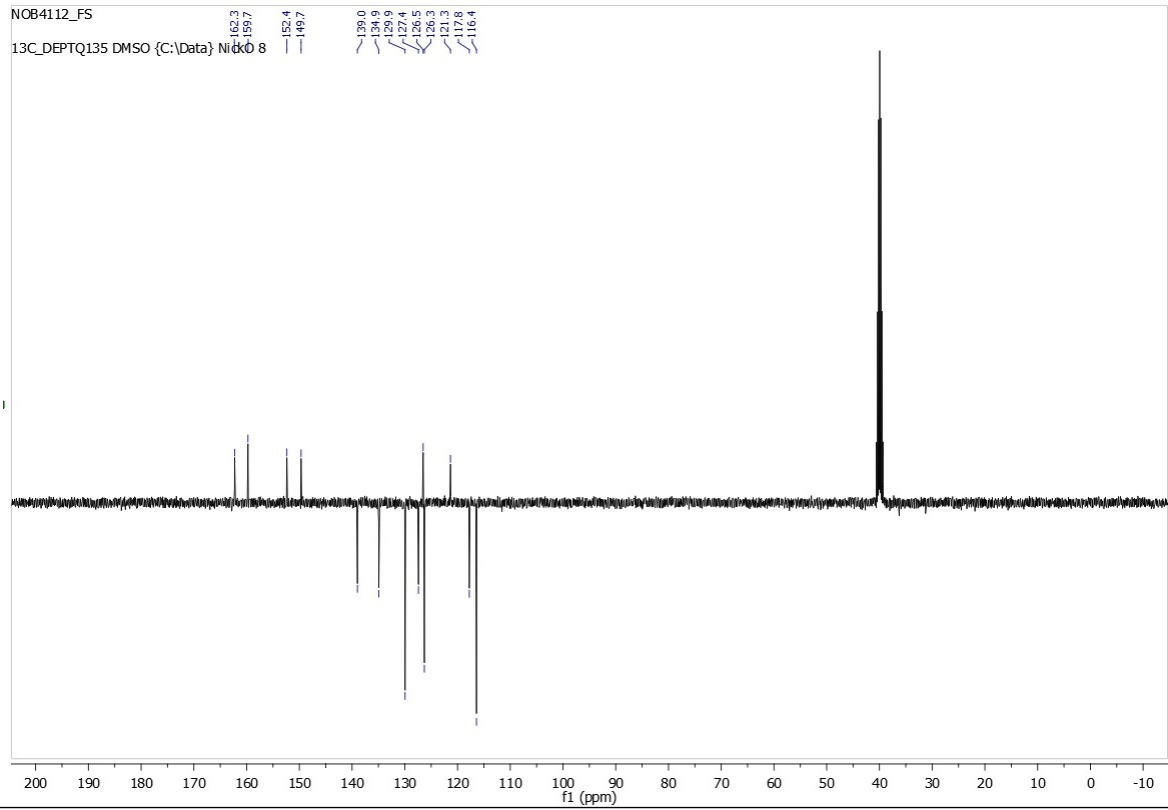

2-(2-methoxystyryl)quinazolin-4(3H)-one (**64**)

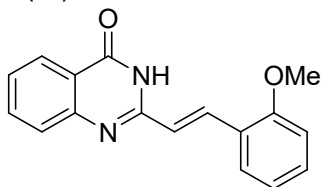

Chemical Formula: C<sub>17</sub>H<sub>14</sub>N<sub>2</sub>O<sub>2</sub>

Exact Mass: 278.11

Molecular Weight: 278.31

IR (neat):  $\nu_{\max}$  = 3087 (NH), 1677 (C=O) cm<sup>-1</sup>

<sup>1</sup>H NMR (400 MHz, DMSO-d<sub>6</sub>)  $\delta$  12.35 (s, 1H), 8.17 (d, *J* = 16.2 Hz, 1H), 8.11 (dd, *J* = 7.9, 1.2 Hz, 1H), 7.85 – 7.75 (m, 1H), 7.69 (d, *J* = 7.9 Hz, 1H), 7.62 (dd, *J* = 7.7, 1.3 Hz, 1H), 7.50 – 7.44 (m, 1H), 7.44 – 7.37 (m, 1H), 7.16 –

<sup>13</sup>C NMR (100 MHz, DMSO-d<sub>6</sub>)  $\delta$  162.24, 158.23, 152.27, 149.56, 134.94, 134.08, 131.68, 128.65, 127.60, 126.49, 126.29, 123.88, 121.85, 121.51, 121.31, 112.30, 56.09.

LRMS (ESI+): 279.1 (M+H, C<sub>17</sub>H<sub>15</sub>N<sub>2</sub>O<sub>2</sub>, 100%);

LRMS (ESI-): 277.1 (M-H, C<sub>17</sub>H<sub>13</sub>N<sub>2</sub>O<sub>2</sub>, 100%).

Mass 88.7 mg

m.p. >225 °C (dec.)

yield 34 %

white solid

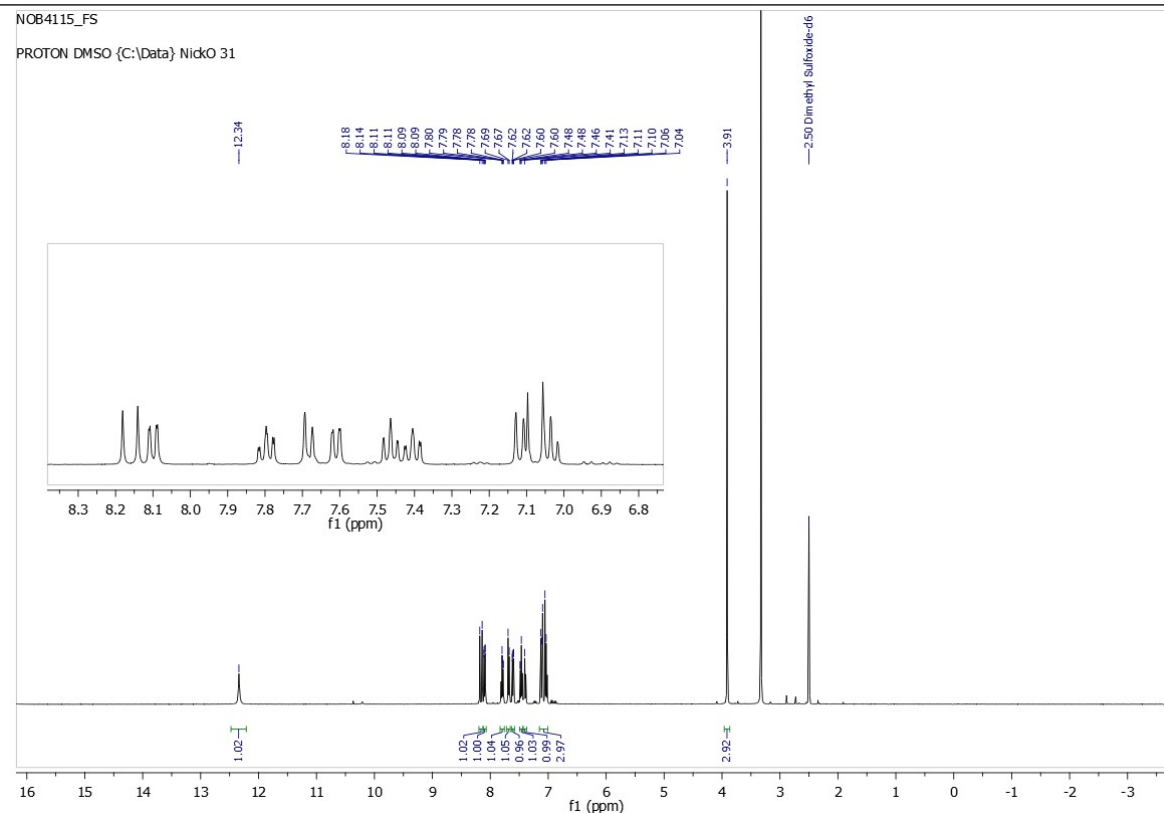

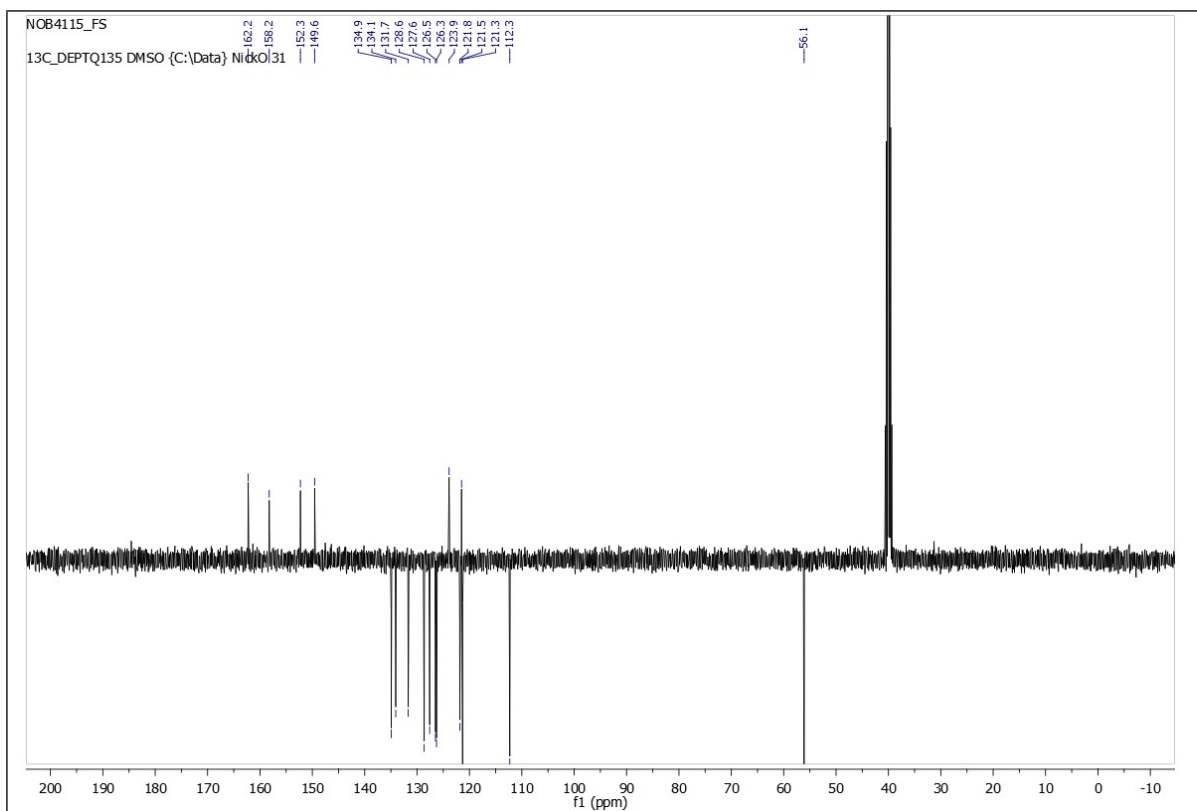

2-(3-methoxystyryl)quinazolin-4(3H)-one (**65**)

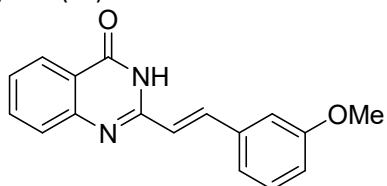

Chemical Formula:  $C_{17}H_{14}N_2O_2$

Exact Mass: 278.11

Molecular Weight: 278.31

**IR** (neat):  $\nu_{\max}$  = 3022 (CH), 1674 (C=O)  $cm^{-1}$

**$^1H$  NMR** (400 MHz, DMSO- $d_6$ )  $\delta$  12.30 (s, 1H), 8.12 (d,  $J$  = 7.1 Hz, 1H), 7.92 (d,  $J$  = 16.2 Hz, 1H), 7.85 – 7.76 (m, 1H), 7.67 (d,  $J$  = 8.1 Hz, 1H), 7.48 (t,  $J$  = 7.4 Hz, 1H), 7.38 (t,  $J$  = 7.9 Hz, 1H), 7.24 (m, 2H), 7.01 (m, 2H), 3.82 (s, 3H).

**$^{13}C$  NMR** (100 MHz, DMSO- $d_6$ )  $\delta$  162.36, 160.14, 152.05, 149.45, 138.59, 136.92, 134.92, 130.57, 127.51, 126.65, 126.34, 122.08, 121.60, 120.48, 116.08, 113.08, 55.64.

**LRMS** (ESI+): 279.1 (M+H,  $C_{17}H_{15}N_2O_2$ , 100%); **LRMS** (ESI-): 277.1 (M-H,  $C_{17}H_{13}N_2O_2$ , 100%).

Mass 54 mg

m.p. >250 °C

yield 31 %

white solid

NOB4114\_FS

PROTON DMSO {C:\Data} NickO 30

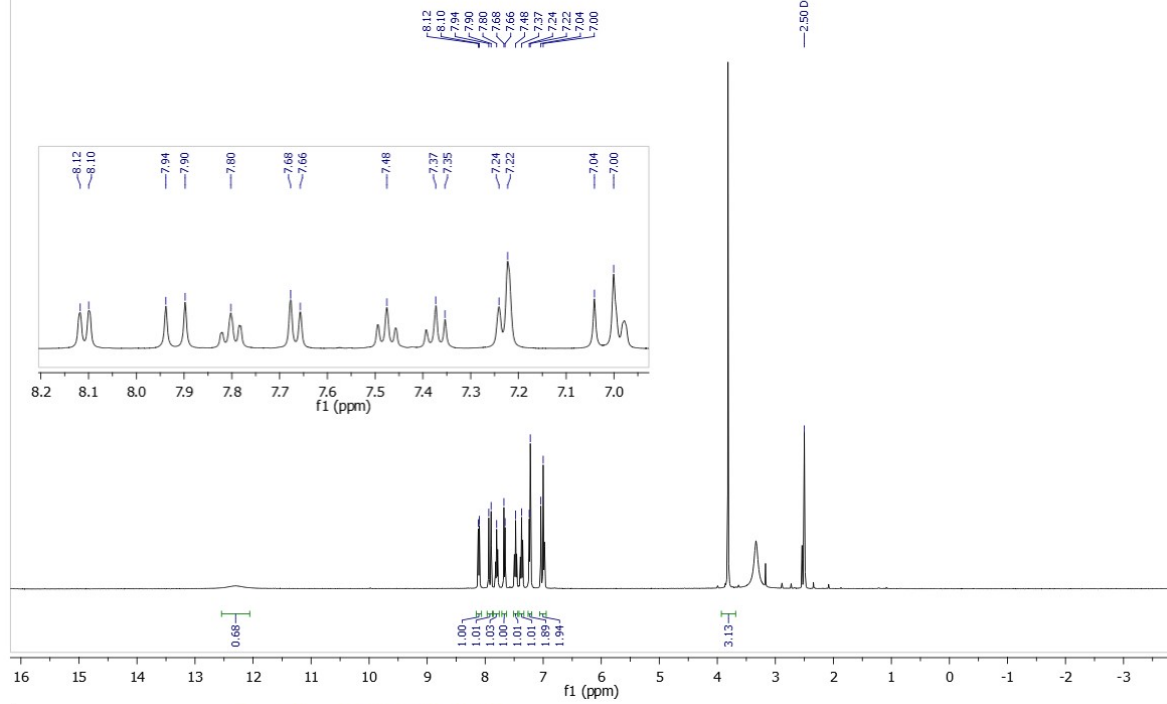

NOB4114\_FS

13C\_DEPTQ135 DMSO {C:\Data} NickO 30

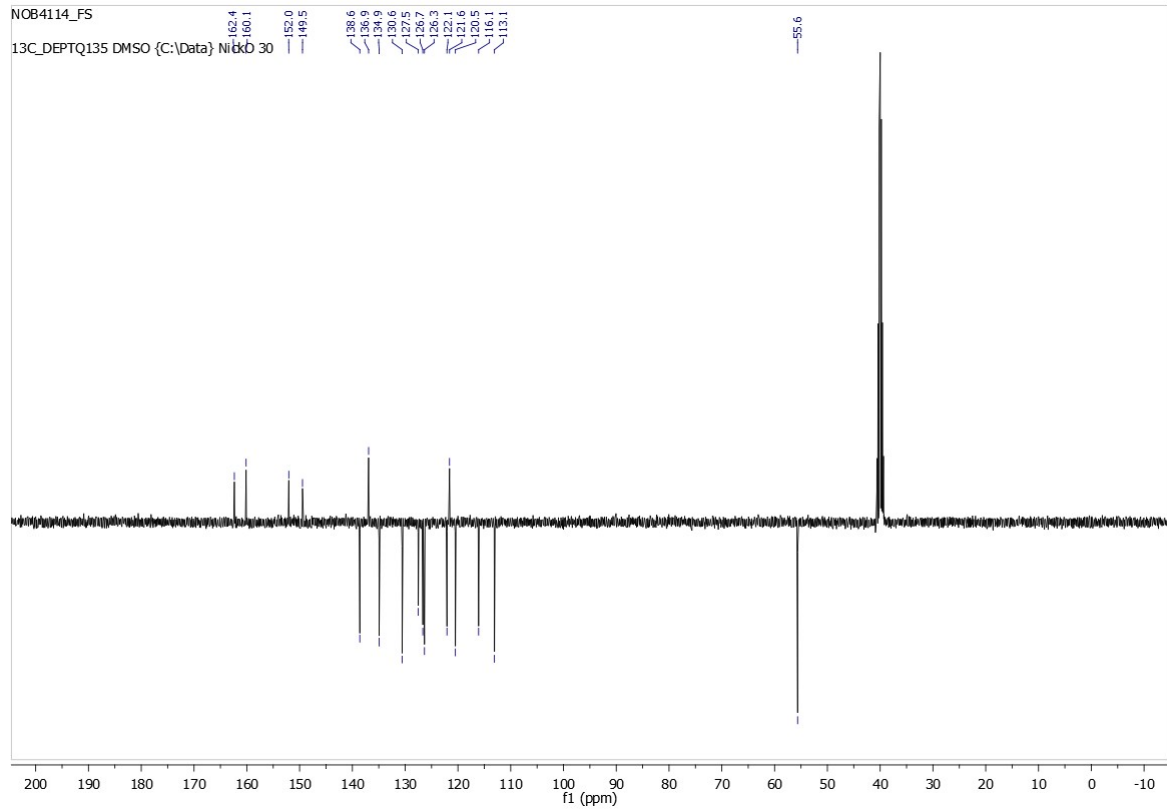

Supplement: d3md00600j1.pdf [file d3md00600j1.pdf]
